# Supplementary material for: Pd/Xiang-Phos-catalyzed enantioselective intermolecular carboheterofunctionalization under mild conditions
Source: PubMed Central journal article supplement (PMC7473404; doi:10.1039/d0sc01391a), 2020-05-29

## Supporting Information

---

# **Pd/Xiang-Phos-Catalyzed                      Enantioselective                      Intermolecular Carboheterofunctionalizations Under Mild Conditions**

Mengna Tao<sup>[a]</sup>, Youshao Tu<sup>[b]</sup>, Yu Liu<sup>[b]</sup>, Haihong Wu<sup>[a]</sup>, Lu Liu<sup>\*, [a]</sup>, and Junliang Zhang<sup>\*, [c],[d]</sup>

<sup>[a]</sup> Shanghai Key Laboratory of Green Chemistry and Chemical Processes, School of Chemistry and Molecular Engineering, East China Normal University, 3663 N. Zhongshan Road, Shanghai 200062, P. R. China.

<sup>[b]</sup> College of Chemistry and Life Science, Advanced Institute of Materials Science, Changchun University of Technology, Changchun, 130012, P. R. China.

<sup>[c]</sup> Department of Chemistry, Fudan University, 2005 Songhu Road, Shanghai 200438, P. R. China

<sup>[d]</sup> State Key Laboratory of Organometallic Chemistry, Shanghai Institute of Organic Chemistry, Chinese Academy of Science.

E-mail: lliu@chem.ecnu.edu.cn  
junliangzhang@fudan.edu.cn

## Supporting Information

---

### Table of Contents

|          |                                                                                                                                                                        |            |
|----------|------------------------------------------------------------------------------------------------------------------------------------------------------------------------|------------|
| <b>1</b> | <b>General Information.....</b>                                                                                                                                        | <b>S3</b>  |
| <b>2</b> | <b>Optimization of the intermolecular carboheterofunctionalizations.....</b>                                                                                           | <b>S4</b>  |
| 2.1      | Optimization of the intermolecular carboamination of 2,3-dihydrofuran.....                                                                                             | S4         |
| 2.2      | Optimization of the intermolecular carboetherification of 2,3-dihydrofuran.....                                                                                        | S6         |
| <b>3</b> | <b>Experimental procedures.....</b>                                                                                                                                    | <b>S8</b>  |
| 3.1      | General procedure for the synthesis of ( <i>S</i> , <i>R<sub>S</sub></i> )- <i>N</i> -Me- <b>X4/X5</b> .....                                                           | S8         |
| 3.2      | General procedure for the intermolecular carboamination of 2,3-dihydrofuran using 2-bromoaniline derivatives (GP1).....                                                | S9         |
| 3.3      | General procedure for the intermolecular carboetherification of 2,3-dihydrofuran using 2-bromophenol derivatives (GP2).....                                            | S9         |
| 3.4      | General procedure for the synthesis of 2-substituted-2,3-dihydrofurans.....                                                                                            | S10        |
| <b>4</b> | <b>General Data for (<i>S</i>, <i>R<sub>S</sub></i>)-<i>N</i>-Me-<b>X4/X5</b>, <b>3</b> and <b>6</b>.....</b>                                                          | <b>S11</b> |
| <b>5</b> | <b>Absolute Configuration of <b>3</b> and <b>6</b>.....</b>                                                                                                            | <b>S37</b> |
| <b>6</b> | <b>References.....</b>                                                                                                                                                 | <b>S39</b> |
| <b>7</b> | <b><sup>1</sup>H, <sup>13</sup>C, <sup>19</sup>F, <sup>31</sup>P Spectra for (<i>S</i>, <i>R<sub>S</sub></i>)-<i>N</i>-Me-<b>X4/X5</b>, <b>3</b> and <b>6</b>.....</b> | <b>S40</b> |

## Supporting Information

---

### 1. General Information

Unless otherwise noted, all reactions were carried out under a nitrogen atmosphere; materials obtained from commercial suppliers were used directly without further purification. The  $[\alpha]_D$  was recorded using PolAAr 3005 High Accuracy Polarimeter.  $^1\text{H}$  NMR spectra and  $^{13}\text{C}$  NMR spectra were recorded on a Bruker 400 MHz or 500 MHz spectrometer in chloroform- $d_3$ , and were calibrated with  $\text{CDCl}_3$  ( $\delta = 77.00$  ppm).  $^{19}\text{F}$  NMR spectra were recorded on a Bruker 400 MHz spectrometer in chloroform- $d_3$ . Chemical shifts (in ppm) were referenced to tetramethylsilane ( $\delta = 0$  ppm) in  $\text{CDCl}_3$  as an internal standard. The data is being reported as (s = singlet, d = doublet, dd = doublet of doublet, t = triplet, m = multiplet or unresolved, br = broad signal, coupling constant(s) in Hz, integration).

Trichloromethane ( $\text{CHCl}_3$ ), dichloromethane, dichloroethane and acetonitrile were freshly distilled from  $\text{CaH}_2$ ; tetrahydrofuran (THF), toluene and ether were dried with sodium benzophenone and distilled before use.

Reactions were monitored by thin layer chromatography (TLC) using silicycle pre-coated silica gel plates. Flash column chromatography was performed on silica gel 60 (particle size 200-400 mesh ASTM, purchased from Yantai, China) and eluted with petroleum ether/ethyl acetate. All reagents and solvents were used as received from commercial sources (*Energy Chemical*, *J&K*<sup>®</sup>, *Adamas-beta*<sup>®</sup>, *Bidepharm*) without further purification. The substrates **2b-f** were synthesized according to published procedures<sup>1</sup>. The spectral data of the substrates were consisted with that reported in the literature<sup>2</sup>. The enantiomeric excesses of the products were determined by chiral stationary phase HPLC using a Chiralpak IA, IB, IC, IF, ADH, ODH, OJH, OJ3.

# Supporting Information

## 2. Optimization of the intermolecular carboheterofunctionalizations

### 2.1 Table S1. Detailed optimization of the enantioselective intermolecular carboamination of 2,3-dihydrofuran and **1a**<sup>[a]</sup>

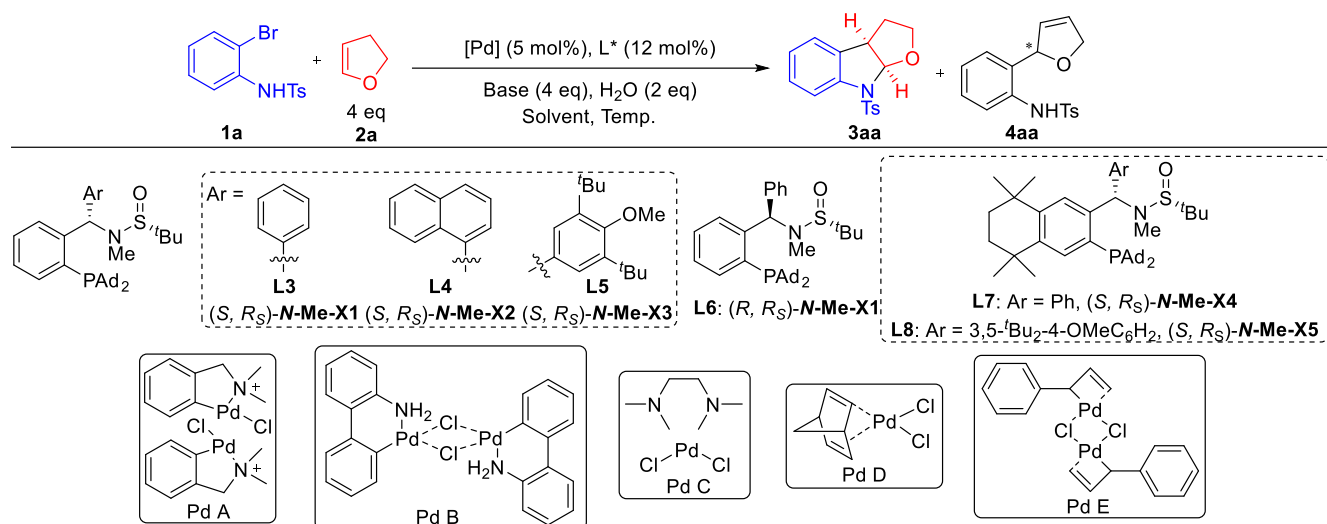

| Entry | Pd                                 | L*        | Base                            | Solvent           | Temp. (°C) | Yield (Ee) (%) <sup>[b,c]</sup> | r.r. <sup>[d]</sup> |
|-------|------------------------------------|-----------|---------------------------------|-------------------|------------|---------------------------------|---------------------|
| 1     | Pd <sub>2</sub> (dba) <sub>3</sub> | <b>L3</b> | CH <sub>3</sub> ONa             | DCM               | 100        | 81(48)                          | 13:2                |
| 2     | Pd <sub>2</sub> (dba) <sub>3</sub> | <b>L3</b> | NaO <sup>t</sup> Bu             | DCM               | 100        | 73(47.3)                        | 5:1                 |
| 3     | Pd <sub>2</sub> (dba) <sub>3</sub> | <b>L3</b> | LiO <sup>t</sup> Bu             | DCM               | 100        | trace                           | -                   |
| 4     | Pd <sub>2</sub> (dba) <sub>3</sub> | <b>L3</b> | KO <sup>t</sup> Bu              | DCM               | 100        | mix                             | -                   |
| 5     | Pd <sub>2</sub> (dba) <sub>3</sub> | <b>L3</b> | NaOEt                           | DCM               | 100        | 52(40.3)                        | 2:1                 |
| 6     | Pd <sub>2</sub> (dba) <sub>3</sub> | <b>L3</b> | NaOPh                           | DCM               | 100        | 63(77.5)                        | 2:1                 |
| 7     | Pd <sub>2</sub> (dba) <sub>3</sub> | <b>L3</b> | Cs <sub>2</sub> CO <sub>3</sub> | DCM               | 100        | mix                             | -                   |
| 8     | Pd <sub>2</sub> (dba) <sub>3</sub> | <b>L3</b> | NaOPh                           | MTBE              | 100        | 44(60)                          | 1:1                 |
| 9     | Pd <sub>2</sub> (dba) <sub>3</sub> | <b>L3</b> | NaOPh                           | THF               | 100        | 41(23)                          | 1:2                 |
| 10    | Pd <sub>2</sub> (dba) <sub>3</sub> | <b>L3</b> | NaOPh                           | 1,2-DCE           | 100        | 81(76)                          | 9:1                 |
| 11    | Pd <sub>2</sub> (dba) <sub>3</sub> | <b>L3</b> | NaOPh                           | CHCl <sub>3</sub> | 100        | mix                             | -                   |
| 12    | Pd <sub>2</sub> (dba) <sub>3</sub> | <b>L3</b> | NaOPh                           | Toluene           | 100        | 42(53)                          | 1:1                 |
| 13    | Pd <sub>2</sub> (dba) <sub>3</sub> | <b>L3</b> | NaOPh                           | MeOH              | 100        | 39(59)                          | 1:1                 |
| 14    | Pd <sub>2</sub> (dba) <sub>3</sub> | <b>L3</b> | NaOPh                           | MeCN              | 100        | mix                             | -                   |
| 15    | Pd <sub>2</sub> (dba) <sub>3</sub> | <b>L3</b> | NaOPh                           | DMF               | 100        | 69(0)                           | 6:1                 |
| 16    | Pd <sub>2</sub> (dba) <sub>3</sub> | <b>L4</b> | NaOPh                           | 1,2-DCE           | 100        | 78(87)                          | 9:1                 |
| 17    | Pd <sub>2</sub> (dba) <sub>3</sub> | <b>L5</b> | NaOPh                           | 1,2-DCE           | 100        | 81(93.1)                        | >30:1               |
| 18    | Pd <sub>2</sub> (dba) <sub>3</sub> | <b>L6</b> | NaOPh                           | 1,2-DCE           | 100        | trace                           | -                   |
| 19    | Pd <sub>2</sub> (dba) <sub>3</sub> | <b>L7</b> | NaOPh                           | 1,2-DCE           | 100        | 77(77)                          | 15:1                |
| 20    | Pd <sub>2</sub> (dba) <sub>3</sub> | <b>L8</b> | NaOPh                           | 1,2-DCE           | 100        | 83(93)                          | >30:1               |
| 21    | Pd(dba) <sub>2</sub>               | <b>L8</b> | NaOPh                           | 1,2-DCE           | 100        | 79(93.7)                        | >30:1               |

## Supporting Information

|                   |                                                                                               |           |       |         |     |          |       |
|-------------------|-----------------------------------------------------------------------------------------------|-----------|-------|---------|-----|----------|-------|
| 22                | Pd <sub>2</sub> (dba) <sub>3</sub> •CHCl <sub>3</sub>                                         | <b>L8</b> | NaOPh | 1,2-DCE | 100 | 81(93.9) | >30:1 |
| 23                | Pd(OAc) <sub>2</sub>                                                                          | <b>L8</b> | NaOPh | 1,2-DCE | 100 | 74(94.1) | >30:1 |
| 24                | (η <sup>3</sup> -C <sub>3</sub> H <sub>5</sub> ) <sub>2</sub> Pd <sub>2</sub> Cl <sub>2</sub> | <b>L8</b> | NaOPh | 1,2-DCE | 100 | 69(93.7) | >30:1 |
| 25                | Pd A                                                                                          | <b>L8</b> | NaOPh | 1,2-DCE | 100 | 82(94.1) | >30:1 |
| 26                | Pd B                                                                                          | <b>L8</b> | NaOPh | 1,2-DCE | 100 | 74(86.9) | >30:1 |
| 27                | Pd C                                                                                          | <b>L8</b> | NaOPh | 1,2-DCE | 100 | N.D.     | -     |
| 28                | Pd D                                                                                          | <b>L8</b> | NaOPh | 1,2-DCE | 100 | 77(81.3) | >30:1 |
| 29                | Pd E                                                                                          | <b>L8</b> | NaOPh | 1,2-DCE | 100 | trace    | -     |
| 30                | Pd A                                                                                          | <b>L8</b> | NaOPh | 1,2-DCE | 80  | 81(93.1) | >30:1 |
| 31                | Pd A                                                                                          | <b>L8</b> | NaOPh | 1,2-DCE | 50  | 81(95.3) | >30:1 |
| 32                | Pd A                                                                                          | <b>L8</b> | NaOPh | 1,2-DCE | 20  | 84(95.5) | >30:1 |
| 34 <sup>[e]</sup> | Pd A                                                                                          | <b>L8</b> | NaOPh | 1,2-DCE | 20  | 73(91.6) | >30:1 |
| 35 <sup>[f]</sup> | Pd A                                                                                          | <b>L8</b> | NaOPh | 1,2-DCE | 20  | 77(93.8) | >30:1 |
| 35 <sup>[g]</sup> | Pd A                                                                                          | <b>L8</b> | NaOPh | 1,2-DCE | 20  | 81(95.3) | >30:1 |
| 35 <sup>[h]</sup> | Pd A                                                                                          | <b>L8</b> | NaOPh | 1,2-DCE | 20  | 79(94.9) | >30:1 |
| 33 <sup>[i]</sup> | Pd A                                                                                          | <b>L8</b> | NaOPh | 1,2-DCE | 20  | 79(95.7) | >30:1 |

[a] Unless otherwise specified, all reactions were carried out with **1a** (0.2 mmol), **2a** (0.8 mmol, 4 eq), [Pd] source (0.01 mmol, 5 mol%), *N*-Me-Xiang-Phos (0.024 mmol, 12 mol%), Base (0.8 mmol, 4 eq), H<sub>2</sub>O (7.2 μL, 2 eq) in solvent (1 mL, 0.2 M). [b] Yield of isolated product. [c] Determined by chiral HPLC. [d] Reaction *r.r.s* of **3aa:4aa**, determined by chiral HPLC. [e] 2.5 mol% Pd A, 6 mol% **L8** were employed. [f] 2 eq NaOPh and 1 eq H<sub>2</sub>O were employed. [g] 1 eq H<sub>2</sub>O were employed. [h] 50 mol% H<sub>2</sub>O were employed. [i] 2 eq H<sub>2</sub>O was removed.

## Supporting Information

2.2 Table S2. Detailed optimization of the enantioselective intermolecular carbocyclization of 2,3-dihydrofuran and **5a**<sup>[a]</sup>

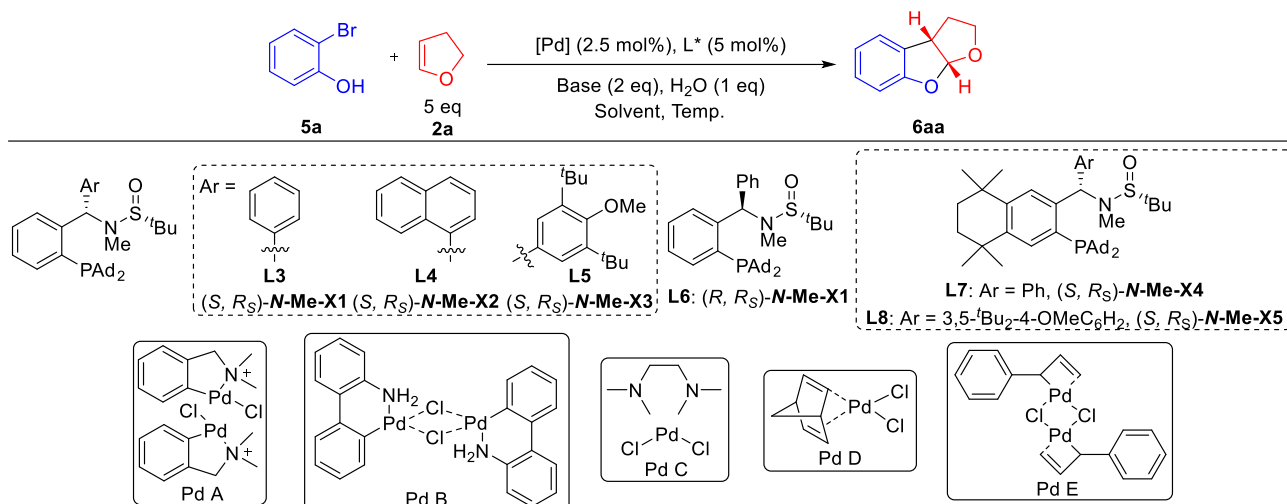

| Entry             | Pd                                                                                            | L*        | Base                            | Solvent | Temp. (°C) | Yield (Ee) (%) <sup>[b,c]</sup> |
|-------------------|-----------------------------------------------------------------------------------------------|-----------|---------------------------------|---------|------------|---------------------------------|
| 1                 | Pd <sub>2</sub> (dba) <sub>3</sub>                                                            | <b>L3</b> | NaO <sup>t</sup> Bu             | Toluene | 80         | 40(87.1)                        |
| 2                 | Pd <sub>2</sub> (dba) <sub>3</sub>                                                            | <b>L3</b> | NaOPh                           | Toluene | 80         | 30(37.9)                        |
| 3                 | Pd <sub>2</sub> (dba) <sub>3</sub>                                                            | <b>L3</b> | CH <sub>3</sub> ONa             | Toluene | 80         | trace                           |
| 4                 | Pd <sub>2</sub> (dba) <sub>3</sub>                                                            | <b>L3</b> | CH <sub>3</sub> OLi             | Toluene | 80         | trace                           |
| 5                 | Pd <sub>2</sub> (dba) <sub>3</sub>                                                            | <b>L3</b> | LiO <sup>t</sup> Bu             | Toluene | 80         | trace                           |
| 6                 | Pd <sub>2</sub> (dba) <sub>3</sub>                                                            | <b>L3</b> | KO <sup>t</sup> Bu              | Toluene | 80         | mix                             |
| 7                 | Pd <sub>2</sub> (dba) <sub>3</sub>                                                            | <b>L3</b> | Cs <sub>2</sub> CO <sub>3</sub> | Toluene | 80         | mix                             |
| 8 <sup>[d]</sup>  | Pd <sub>2</sub> (dba) <sub>3</sub>                                                            | <b>L3</b> | NaO <sup>t</sup> Bu             | THF     | 80         | 30(74.5)                        |
| 9 <sup>[d]</sup>  | Pd <sub>2</sub> (dba) <sub>3</sub>                                                            | <b>L3</b> | NaO <sup>t</sup> Bu             | MTBE    | 80         | 34(67.1)                        |
| 10 <sup>[d]</sup> | Pd <sub>2</sub> (dba) <sub>3</sub>                                                            | <b>L3</b> | NaO <sup>t</sup> Bu             | DCM     | 80         | 45(32.5)                        |
| 11 <sup>[d]</sup> | Pd <sub>2</sub> (dba) <sub>3</sub>                                                            | <b>L3</b> | NaO <sup>t</sup> Bu             | 1,2-DCE | 80         | 39(20.3)                        |
| 12 <sup>[d]</sup> | Pd <sub>2</sub> (dba) <sub>3</sub>                                                            | <b>L3</b> | NaO <sup>t</sup> Bu             | Toluene | 80         | 40(71.5)                        |
| 13                | Pd <sub>2</sub> (dba) <sub>3</sub>                                                            | <b>L3</b> | NaO <sup>t</sup> Bu             | Toluene | 20         | 55(95.3)                        |
| 14                | Pd <sub>2</sub> (dba) <sub>3</sub>                                                            | <b>L3</b> | NaO <sup>t</sup> Bu             | THF     | 20         | 30(97)                          |
| 15                | Pd(dba) <sub>2</sub>                                                                          | <b>L3</b> | NaO <sup>t</sup> Bu             | Toluene | 20         | 23(94.3)                        |
| 16                | Pd <sub>2</sub> (dba) <sub>3</sub> •CHCl <sub>3</sub>                                         | <b>L3</b> | NaO <sup>t</sup> Bu             | Toluene | 20         | 38(96.5)                        |
| 17                | Pd(OAc) <sub>2</sub>                                                                          | <b>L3</b> | NaO <sup>t</sup> Bu             | Toluene | 20         | 49(91.5)                        |
| 18                | (η <sup>3</sup> -C <sub>3</sub> H <sub>5</sub> ) <sub>2</sub> Pd <sub>2</sub> Cl <sub>2</sub> | <b>L3</b> | NaO <sup>t</sup> Bu             | Toluene | 20         | 53(94.3)                        |
| 19                | Pd A                                                                                          | <b>L3</b> | NaO <sup>t</sup> Bu             | Toluene | 20         | 51(94.7)                        |
| 20                | Pd B                                                                                          | <b>L3</b> | NaO <sup>t</sup> Bu             | Toluene | 20         | 42(83.1)                        |
| 21                | Pd C                                                                                          | <b>L3</b> | NaO <sup>t</sup> Bu             | Toluene | 20         | trace                           |
| 22                | Pd D                                                                                          | <b>L3</b> | NaO <sup>t</sup> Bu             | Toluene | 20         | 33(77.2)                        |
| 23                | Pd E                                                                                          | <b>L3</b> | NaO <sup>t</sup> Bu             | Toluene | 20         | mix                             |
| 24                | Pd <sub>2</sub> (dba) <sub>3</sub>                                                            | <b>L4</b> | NaO <sup>t</sup> Bu             | Toluene | 20         | 49(94.3)                        |

## Supporting Information

|                   |                                    |           |                     |         |    |          |
|-------------------|------------------------------------|-----------|---------------------|---------|----|----------|
| 25                | Pd <sub>2</sub> (dba) <sub>3</sub> | <b>L5</b> | NaO <sup>t</sup> Bu | Toluene | 20 | 44(85)   |
| 26                | Pd <sub>2</sub> (dba) <sub>3</sub> | <b>L6</b> | NaO <sup>t</sup> Bu | Toluene | 20 | trace    |
| 27                | Pd <sub>2</sub> (dba) <sub>3</sub> | <b>L7</b> | NaO <sup>t</sup> Bu | Toluene | 20 | 60(96.3) |
| 28                | Pd <sub>2</sub> (dba) <sub>3</sub> | <b>L8</b> | NaO <sup>t</sup> Bu | Toluene | 20 | 52(81.9) |
| 29 <sup>[e]</sup> | Pd <sub>2</sub> (dba) <sub>3</sub> | <b>L7</b> | NaO <sup>t</sup> Bu | Toluene | 20 | 21(91.1) |
| 30 <sup>[f]</sup> | Pd <sub>2</sub> (dba) <sub>3</sub> | <b>L7</b> | NaO <sup>t</sup> Bu | Toluene | 20 | 35(94.5) |

[a] Unless otherwise specified, all reactions were carried out with **5a** (0.2 mmol), **2a** (1 mmol, 5 eq), [Pd] source (0.005 mmol, 2.5 mol%), **N-Me-Xiang-Phos** (0.01 mmol, 5 mol%), Base (0.4 mmol, 2 eq), H<sub>2</sub>O (3.6 μL, 1 eq) in solvent (1 mL, 0.2 M). [b] Yield of isolated product. [c] Determined by chiral HPLC. [d] Pd<sub>2</sub>(dba)<sub>3</sub> was added to 5 mol%, also **L3** was added to 10 mol%. [e] 1 eq H<sub>2</sub>O was removed. [f] 4 eq NaO<sup>t</sup>Bu and 1 eq H<sub>2</sub>O were employed.

## Supporting Information

### 3. Experimental procedures

#### 3.1 General procedure for the synthesis of (*S*, *R*<sub>S</sub>)-*N*-Me-X4/X5.

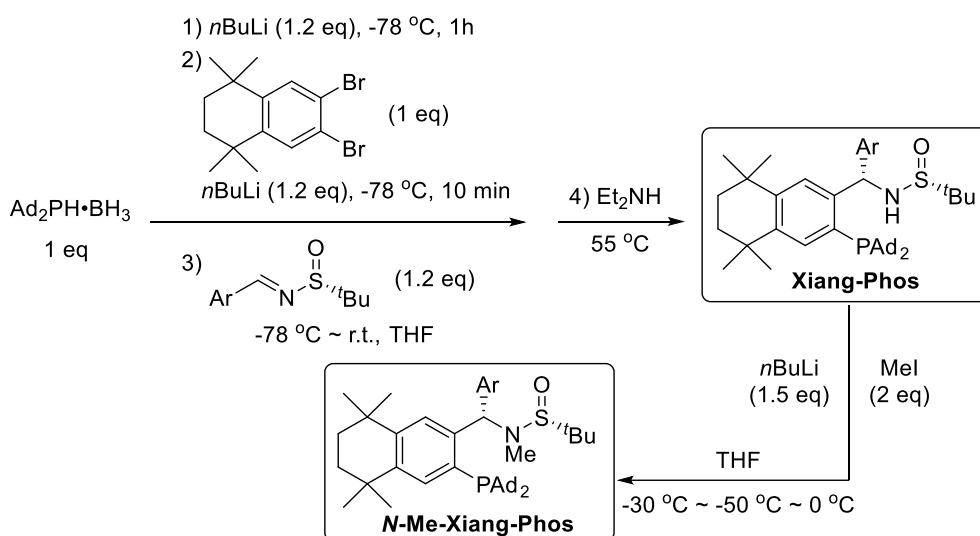

To a solution of di-1-adamantylphosphine borane (5 mmol) in dry THF (25 mL) was added *n*BuLi (1.2 eq, 1.6 M in hexane) dropwise under argon at -78 °C. The resulting solution at this temperature during 1 hour and 1,2-dibromo compound (5 mmol) was added dropwise followed by *n*BuLi (1.2 eq, 1.6 M in hexane). After 10 minutes at -78 °C, (*R*<sub>S</sub>)-sulfinyl imine (6 mmol) was added and the reaction mixture was warmed to room temperature overnight. The reaction mixture was quenched by the addition of NH<sub>4</sub>Cl (aq.) and diluted with EtOAc. The organic layer was separated, and the aqueous layer was extracted twice with EtOAc. The combined organic layers were dried over Na<sub>2</sub>SO<sub>4</sub>, filtered, concentrated. The crude product was dealt with Et<sub>2</sub>NH (15 mL) and the resulting solution was stirred under argon at 55 °C. After the reaction was complete (monitored by TLC), solvent was removed under reduced pressure. The crude product was then purified by flash column chromatography on silica gel (Petroleum ether : EtOAc = 10:1) to afford the desired **Xiang-Phos**.

To a solution of **Xiang-Phos** (2 mmol) in dry THF (5 mL) was added *n*BuLi (1.5 eq, 1.6 M in hexane) dropwise under argon at -30 °C. The resulting solution was stirred at this temperature for 1 hour and then MeI (2 eq) was added dropwise at -50 °C. The resulting solution was stirred at this temperature for 1.5 hours and then stirred at 0 °C for another 1.5 hours. The reaction mixture was quenched by the addition of NH<sub>4</sub>Cl (aq.) and diluted with EtOAc. The organic layer was separated, and the aqueous layer was extracted twice with EtOAc. The combined organic layers were dried over Na<sub>2</sub>SO<sub>4</sub>, filtered, concentrated. The crude product was then purified by flash column chromatography on silica gel (Petroleum ether: EtOAc = 10:1) to afford the desired ***N*-Me-Xiang-Phos**.



## Supporting Information

### 3.2 General procedure for the intermolecular carboamination of 2,3-dihydrofuran using 2-bromoaniline derivatives (GP1)

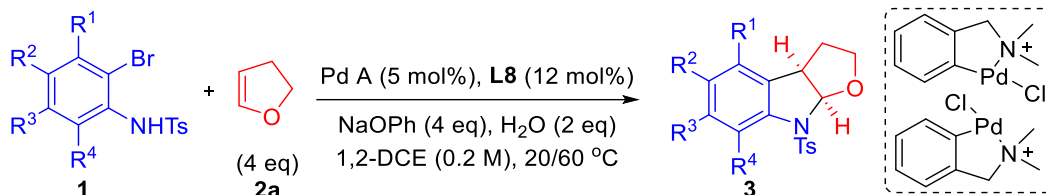

To a sealed tube was added Pd A (5 mol%), **N-Me-X5** (12 mol%). The flask was evacuated and refilled with argon. Then 2-Br-anilines **1** (0.2 mmol) and dry 1,2-DCE (1 mL) were added to the tube. NaOPh (4 eq) and H<sub>2</sub>O (2 eq) were subsequently added under a flow of argon, followed by **2a** (4 eq). The mixture was stirred at 20 or 60 °C for 12-36 h. After the reaction was complete (monitored by TLC), solvent was removed under reduced pressure. The crude product was then purified by flash column chromatography on silica gel using hexane/EtOAc as the eluent to afford the desired product **3**.

### 3.3 General procedure for the intermolecular carboetherification of 2,3-dihydrofuran using 2-bromophenol derivatives (GP2)

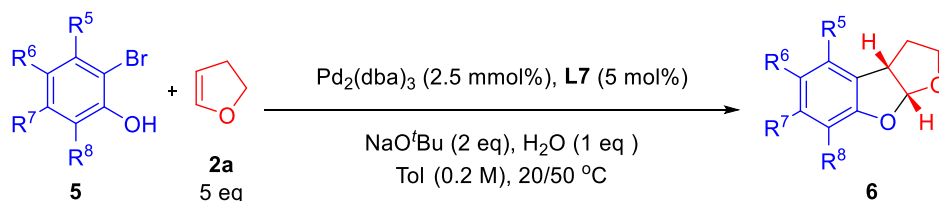

To a sealed tube was added Pd<sub>2</sub>(dba)<sub>3</sub> (2.5 mol%), **N-Me-X4** (5 mol%). The flask was evacuated and refilled with argon. Then 2-Br-phenols **5** (0.3 mmol) and dry toluene (1.5 mL) were added to the tube. NaO<sup>t</sup>Bu (2 eq) and H<sub>2</sub>O (1 eq) were subsequently added under a flow of argon, followed by **2a** (5 eq). The mixture was stirred at 20 or 50 °C for 24-48 h. After the reaction was complete (monitored by TLC), solvent was removed under reduced pressure. The crude product was then purified by flash column chromatography on silica gel using hexane/Et<sub>2</sub>O as the eluent to afford the desired product **6**.

## Supporting Information

### 3.4 General procedure for the synthesis of 2-substituted-2,3-dihydrofurans (GP3)<sup>1</sup>

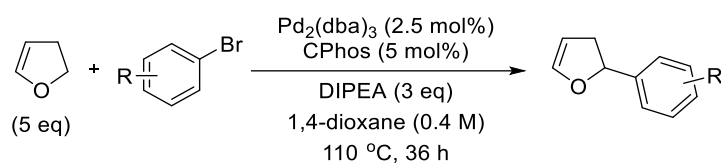

In a glovebox, a 50 mL Young valve Schlenk was charged with Pd<sub>2</sub>(dba)<sub>3</sub> (126 mg, 0.138 mmol, 2.5 mol%), CPhos (120 mg, 0.275 mmol, 5 mol%) and distilled and degassed 1,4-dioxane (10 mL). The Schlenk was taken outside the glovebox, connected to a two-manifold line and the mixture was stirred at room temperature for 10 minutes. Next, the corresponding aryl bromide (5.5 mmol, 1 equiv.), DIPEA (2.8 mL, 16.5 mmol, 3.0 equiv.) and 2,3-dihydrofuran (2.0 mL, 27.5 mmol, 5 equiv.) were added consecutively under a flow of N<sub>2</sub> gas. The sealed reaction tube was immersed in an oil bath pre-heated at 110 °C for 36 h. After cooling to room temperature, the reaction mixture was poured into Et<sub>2</sub>O (20 mL) under vigorous stirring and the resulting precipitate was removed passing the suspension through a short pad of Celite. The volatiles were evaporated and the resulting oil was directly subjected to flash chromatography (Pentane/Et<sub>2</sub>O).

## Supporting Information

### 4. General Data for (*S*, *R*<sub>S</sub>)-*N*-Me-X4/X5, 3 and 6

**(*R*)-*N*-((*S*)-(3-(di((1*s*,3*R*,5*S*,7*S*)-adamantan-1-yl)phosphanyl)-5,5,8,8-tetramethyl-5,6,7,8-tetrahydronaphthalen-2-yl)(phenyl)methyl)-*N*,2-dimethylpropane-2-sulfinamide**

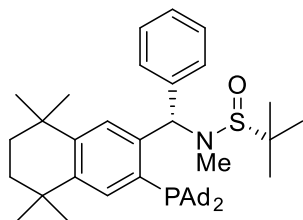

(*S*, *R*<sub>S</sub>)-*N*-Me-X4; colorless solid (hexane/EtOAc/DCM = 3:1:1, 38% overall yield); m.p. = 227-229 °C;  $[\alpha]_{\text{D}}^{20} = 85.438$  ( $c = 0.375$ , CH<sub>2</sub>Cl<sub>2</sub>); <sup>1</sup>H NMR (500 MHz, CDCl<sub>3</sub>) δ 7.77 (d,  $J = 4.5$  Hz, 1H), 7.60 (d,  $J = 2.1$  Hz, 1H), 7.21 – 7.18 (m, 2H), 7.14 – 7.11 (m, 3H), 6.88 (d,  $J = 9.7$  Hz, 1H), 2.58 (s, 3H), 1.98 (d,  $J = 11.9$  Hz, 3H), 1.90 (s, 3H), 1.85 (d,  $J = 11.8$  Hz, 3H), 1.73 (d,  $J = 2.8$  Hz, 3H), 1.68 (d,  $J = 15.2$  Hz, 10H), 1.50 (s, 6H), 1.44 (s, 6H), 1.39 (d,  $J = 19.3$  Hz, 6H), 1.32 (s, 6H), 1.05 (s, 9H). <sup>13</sup>C NMR (126 MHz, CDCl<sub>3</sub>) δ 145.69, 144.40 (d,  $J = 23.8$  Hz), 141.43, 139.89, 135.50 (d,  $J = 2.6$  Hz), 131.89, 129.09 (d,  $J = 25.4$  Hz), 127.43, 126.80, 125.72 (d,  $J = 5.8$  Hz), 70.94 (d,  $J = 33.3$  Hz), 58.56, 41.83, 41.76 (dd,  $J = 12.6$ , 7.1 Hz), 41.68, 37.65, 37.47, 37.00, 36.82, 36.62, 36.44, 35.06 (d,  $J = 5.5$  Hz), 34.34, 33.96, 31.83 (dd,  $J = 24.9$ , 15.2 Hz), 30.41, 28.80 (dd,  $J = 8.7$ , 6.1 Hz), 24.22. <sup>31</sup>P NMR (202 MHz, CDCl<sub>3</sub>) δ 15.94. HRMS (ESI)  $m/z$  calcd. For C<sub>46</sub>H<sub>67</sub>NOPS [M+H]<sup>+</sup> = 712.4675, found = 712.4666; IR spectrum (neat) (cm<sup>-1</sup>) = 2980, 2909, 2359, 1198, 1167, 1086, 961, 949, 928, 880, 733, 669.

**(*R*)-*N*-((*S*)-(3-(di((1*s*,3*R*,5*S*,7*S*)-adamantan-1-yl)phosphanyl)-5,5,8,8-tetramethyl-5,6,7,8-tetrahydronaphthalen-2-yl)(3,5-di-tert-butyl-4-methoxyphenyl)methyl)-*N*,2-dimethylpropane-2-sulfinamide**

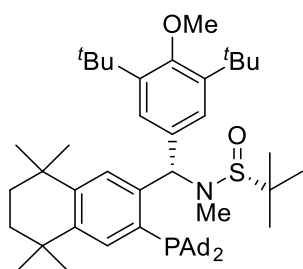

(*S*, *R*<sub>S</sub>)-*N*-Me-X5; colorless solid (hexane/EtOAc/DCM = 3:1:1, 31% overall yield); m.p. = 159-161 °C;  $[\alpha]_{\text{D}}^{20} = 96.185$  ( $c = 0.375$ , CH<sub>2</sub>Cl<sub>2</sub>); <sup>1</sup>H NMR (500 MHz, CDCl<sub>3</sub>) δ 7.81 (d,  $J = 4.5$  Hz, 1H), 7.60 (d,  $J = 2.1$  Hz, 1H), 6.97 (s, 2H), 6.75 (d,  $J = 9.9$  Hz, 1H), 3.57 (s, 3H), 2.59 (s, 3H), 1.99 (d,  $J = 11.9$  Hz, 3H), 1.90–1.85 (m, 6H), 1.76–1.71 (m, 4H), 1.69–1.64 (m, 6H), 1.52–1.46 (m, 7H), 1.43–1.40 (m, 12H), 1.32–1.29 (m, 26H), 1.00 (s, 9H). <sup>13</sup>C NMR (126 MHz, CDCl<sub>3</sub>) δ 158.23, 145.62, 144.58 (d,  $J = 23.9$  Hz), 141.86, 141.19, 135.45 (d,  $J = 2.5$  Hz), 133.51, 130.90, 129.12 (d,  $J = 25.4$  Hz), 125.12 (d,  $J = 5.8$  Hz), 71.12 (d,  $J = 34.4$  Hz), 64.23, 58.40, 41.68 (dd,  $J = 12.8$ , 7.5 Hz), 37.51 (d,  $J = 23.3$  Hz), 36.94 (d,  $J$

## Supporting Information

= 22.0 Hz), 36.55 (d,  $J = 24.1$  Hz), 35.57, 35.12, 34.41, 33.94, 32.45, 32.07, 32.02, 31.62, 31.42, 30.73, 28.82 (dd,  $J = 8.6, 6.9$  Hz), 24.15.  $^{31}\text{P}$  NMR (202 MHz,  $\text{CDCl}_3$ )  $\delta$  15.24. HRMS (ESI)  $m/z$  calcd. For  $\text{C}_{55}\text{H}_{85}\text{NO}_2\text{PS}$   $[\text{M}+\text{H}]^+ = 854.6033$ , found = 854.6048; IR spectrum (neat) ( $\text{cm}^{-1}$ ) = 2895, 1450, 1362, 1250, 1198, 1167, 1088, 961, 930, 880, 777, 733.

### (3aR,8aR)-8-tosyl-3,3a,8,8a-tetrahydro-2H-furo[2,3-b]indole

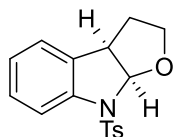

**3aa**; colorless solid (hexane/EtOAc = 8:1, 84% isolated yield); m.p. = 97-98 °C;  $[\alpha]_{\text{D}}^{20} = 24.960$  ( $c = 0.625$ ,  $\text{CHCl}_3$ );  $^1\text{H}$  NMR (500 MHz,  $\text{CDCl}_3$ )  $\delta$  7.86 (d,  $J = 8.3$  Hz, 2H), 7.36 (d,  $J = 8.1$  Hz, 1H), 7.24 (d,  $J = 8.2$  Hz, 2H), 7.18 – 7.12 (m, 2H), 6.98 (t,  $J = 7.5$  Hz, 1H), 6.26 (d,  $J = 6.6$  Hz, 1H), 3.97 (t,  $J = 8.0$  Hz, 1H), 3.90 (t,  $J = 7.5$  Hz, 1H), 3.33 – 3.28 (m, 1H), 2.37 (s, 3H), 2.33 – 2.25 (m, 1H), 2.01 (dd,  $J = 12.2, 4.7$  Hz, 1H).  $^{13}\text{C}$  NMR (126 MHz,  $\text{CDCl}_3$ )  $\delta$  143.82, 141.43, 136.46, 131.32, 129.50, 128.30, 127.32, 124.83, 123.48, 112.74, 95.71, 66.35, 45.45, 33.62, 21.44. Enantiomeric excess: 96%, determined by HPLC (Chiralpak OJ-3, hexane/*i*-PrOH = 80/20; flow rate 0.8 ml/min; 25 °C; 254 nm), first peak:  $t_{\text{R}} = 20.2$  min, second peak:  $t_{\text{R}} = 28.4$  min; HRMS (ESI)  $m/z$  calcd. for  $\text{C}_{17}\text{H}_{17}\text{NNaO}_3\text{S}$   $[\text{M}+\text{Na}]^+ = 338.0821$ , found = 338.0820; IR spectrum (neat) ( $\text{cm}^{-1}$ ) = 2878, 1481, 1460, 1354, 1169, 1091, 949, 881, 752, 663.

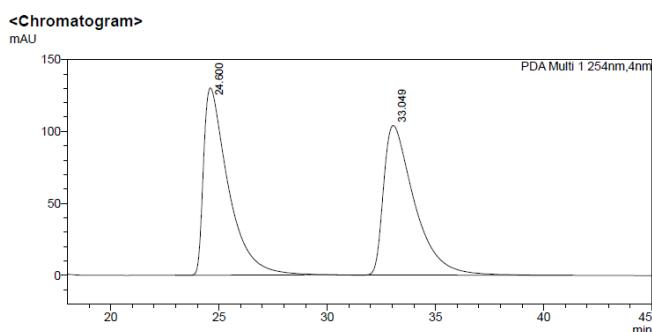

<Peak Table>

| Peak# | Ret. Time | Height | Height% | Area     | Area%   |
|-------|-----------|--------|---------|----------|---------|
| 1     | 24.600    | 130241 | 55.604  | 10376534 | 50.105  |
| 2     | 33.049    | 103987 | 44.396  | 10333132 | 49.895  |
| Total |           | 234228 | 100.000 | 20709665 | 100.000 |

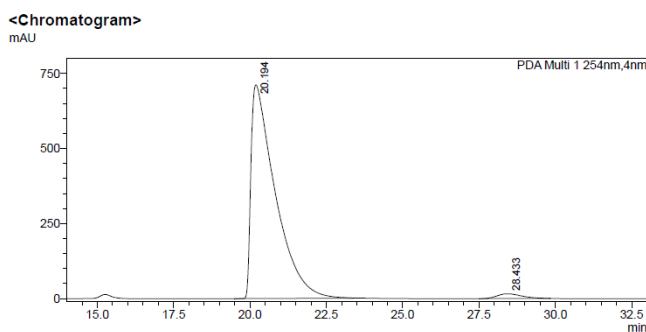

<Peak Table>

| Peak# | Ret. Time | Height | Height% | Area     | Area%   |
|-------|-----------|--------|---------|----------|---------|
| 1     | 20.194    | 711984 | 97.831  | 39400130 | 97.804  |
| 2     | 28.433    | 15783  | 2.169   | 894579   | 2.196   |
| Total |           | 727767 | 100.000 | 40284709 | 100.000 |

### (3aR,8aR)-5-fluoro-8-tosyl-3,3a,8,8a-tetrahydro-2H-furo[2,3-b]indole

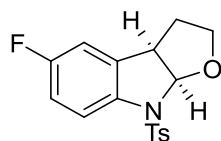

**3ba**; colorless solid (hexane/EtOAc = 8:1, 97% isolated yield); m.p. = 68-70 °C;  $[\alpha]_{\text{D}}^{20} = 34.672$  ( $c = 0.55$ ,  $\text{CHCl}_3$ );  $^1\text{H}$  NMR (500 MHz,  $\text{CDCl}_3$ )  $\delta$  7.81 (d,  $J = 8.3$  Hz, 2H), 7.33 (dd,  $J = 8.8, 4.4$  Hz, 1H), 7.25 (d,  $J = 8.1$  Hz, 2H), 6.89 – 6.83 (m, 2H), 6.24 (d,  $J = 6.6$  Hz, 1H), 3.98 (dd,  $J = 12.1, 4.2$  Hz, 1H), 3.86 (t,  $J$

## Supporting Information

= 7.6 Hz, 1H), 3.35 – 3.30 (m, 1H), 2.38 (s, 3H), 2.33 – 2.25 (m, 1H), 1.99 (dd,  $J = 12.3, 4.7$  Hz, 1H).  $^{13}\text{C}$  NMR (126 MHz,  $\text{CDCl}_3$ )  $\delta$  160.47, 158.55, 144.03, 137.51 (d,  $J = 2.0$  Hz), 136.10, 133.41 (d,  $J = 8.1$  Hz), 129.59, 127.25, 114.87 (d,  $J = 23.4$  Hz), 113.89 (d,  $J = 8.3$  Hz), 112.05 (d,  $J = 24.1$  Hz), 96.22, 66.36, 45.47 (d,  $J = 1.7$  Hz), 33.45, 21.46.  $^{19}\text{F}$  NMR (376 MHz,  $\text{CDCl}_3$ )  $\delta$  -119.61. Enantiomeric excess: 87%, determined by HPLC (Chiralpak OJ-3, hexane/*i*-PrOH = 70/30; flow rate 0.8 ml/min; 25 °C; 254 nm), first peak:  $t_R = 19.0$  min, second peak:  $t_R = 29.5$  min; HRMS (ESI)  $m/z$  calcd. for  $\text{C}_{17}\text{H}_{16}\text{FNNaO}_3\text{S}$   $[\text{M}+\text{Na}]^+ = 356.0727$ , found = 356.0721; IR spectrum (neat) ( $\text{cm}^{-1}$ ) = 2884, 1356, 1167, 1092, 961, 883, 814, 710, 669, 598.

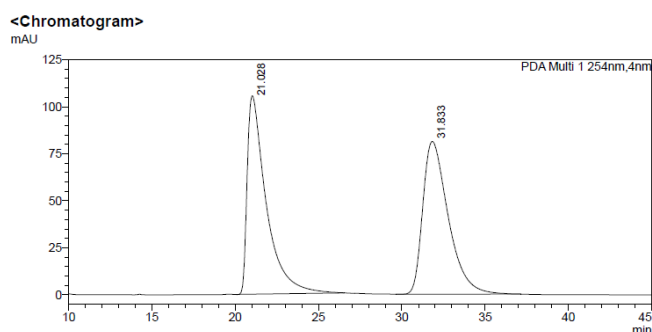

<Peak Table>  
PDA Ch1 254nm

| Peak# | Ret. Time | Height | Height% | Area     | Area%   |
|-------|-----------|--------|---------|----------|---------|
| 1     | 21.028    | 105513 | 56.491  | 8407652  | 49.296  |
| 2     | 31.833    | 81267  | 43.509  | 8651244  | 50.714  |
| Total |           | 186781 | 100.000 | 17058896 | 100.000 |

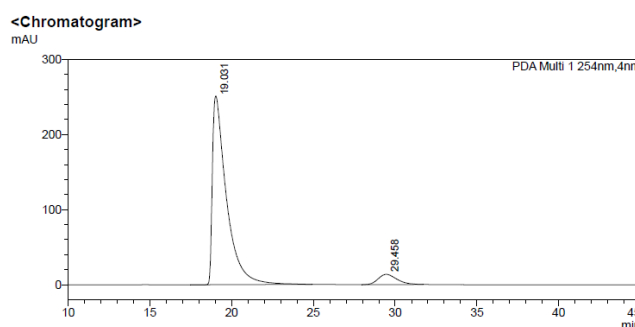

<Peak Table>  
PDA Ch1 254nm

| Peak# | Ret. Time | Height | Height% | Area     | Area%   |
|-------|-----------|--------|---------|----------|---------|
| 1     | 19.031    | 251464 | 94.870  | 15079259 | 93.303  |
| 2     | 29.458    | 13599  | 5.130   | 1082333  | 6.697   |
| Total |           | 265062 | 100.000 | 16161592 | 100.000 |

### (3*aR*,8*aR*)-5-chloro-8-tosyl-3,3*a*,8,8*a*-tetrahydro-2*H*-furo[2,3-*b*]indole

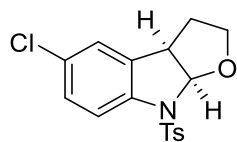

**3ca**; colorless solid (hexane/EtOAc = 8:1, 94% isolated yield); m.p. = 90-91 °C;  $[\alpha]_D^{20} = 35.818$  ( $c = 0.55$ ,  $\text{CHCl}_3$ );  $^1\text{H}$  NMR (500 MHz,  $\text{CDCl}_3$ )  $\delta$  7.83 (d,  $J = 8.3$  Hz, 2H), 7.31 (d,  $J = 8.6$  Hz, 1H), 7.27 – 7.25 (m, 2H), 7.13 (dd,  $J = 8.6, 1.9$  Hz, 1H), 7.10 (s, 1H), 6.25 (d,  $J = 6.6$  Hz, 1H), 3.98 (t,  $J = 8.0$  Hz, 1H), 3.89 – 3.86 (m, 1H), 3.33 – 3.28 (m, 1H), 2.38 (s, 3H), 2.33 – 2.25 (m, 1H), 2.00 (dd,  $J = 12.3, 4.7$  Hz, 1H).  $^{13}\text{C}$  NMR (126 MHz,  $\text{CDCl}_3$ )  $\delta$  144.12, 140.17, 136.11, 133.32, 129.61, 128.32, 127.28, 125.04, 113.76, 96.05, 66.37, 45.32, 33.47, 21.47. Enantiomeric excess: 87%, determined by HPLC (Chiralpak OJ-3, hexane/*i*-PrOH = 80/20; flow rate 0.8 ml/min; 25 °C; 254 nm), first peak:  $t_R = 26.5$  min, second peak:  $t_R = 31.9$  min; HRMS (ESI)  $m/z$  calcd. for  $\text{C}_{17}\text{H}_{16}\text{ClNNaO}_3\text{S}$   $[\text{M}+\text{Na}]^+ = 372.0432$ , found = 372.0423; IR spectrum (neat) ( $\text{cm}^{-1}$ ) = 2884, 1356, 1167, 1090, 961, 930, 881, 669, 590.

## Supporting Information

<Chromatogram>

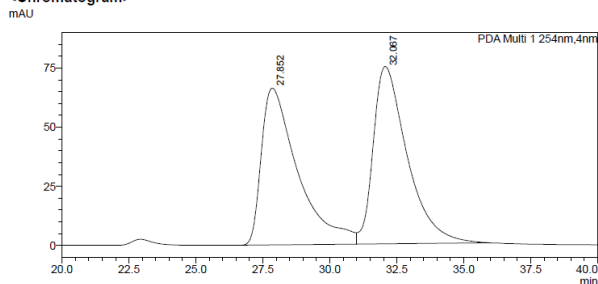

<Peak Table>

| Peak# | Ret. Time | Height | Height% | Area     | Area%   |
|-------|-----------|--------|---------|----------|---------|
| 1     | 27.852    | 66270  | 46.929  | 6278736  | 48.654  |
| 2     | 32.067    | 74944  | 53.071  | 6626171  | 51.346  |
| Total |           | 141214 | 100.000 | 12904908 | 100.000 |

<Chromatogram>

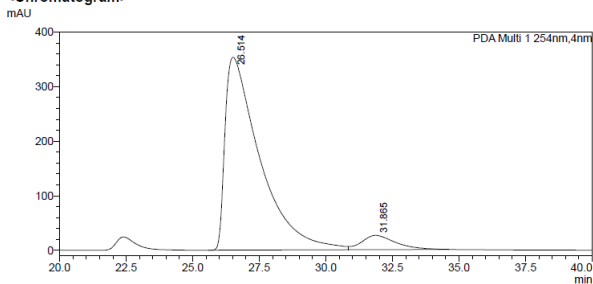

<Peak Table>

| Peak# | Ret. Time | Height | Height% | Area     | Area%   |
|-------|-----------|--------|---------|----------|---------|
| 1     | 26.514    | 353693 | 93.133  | 32223977 | 93.308  |
| 2     | 31.865    | 26081  | 6.867   | 2311244  | 6.692   |
| Total |           | 379774 | 100.000 | 34535221 | 100.000 |

### (3aR,8aR)-5-methyl-8-tosyl-3,3a,8,8a-tetrahydro-2H-furo[2,3-b]indole

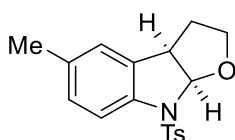

**3da**; amorphous colorless solid (hexane/EtOAc = 8:1, 95% isolated yield); m.p. = 53-54 °C;  $[\alpha]_D^{20} = 49.781$  ( $c = 0.55$ ,  $\text{CHCl}_3$ );  $^1\text{H NMR}$  (500 MHz,  $\text{CDCl}_3$ )  $\delta$  7.83 (d,  $J = 8.3$  Hz, 2H), 7.27 (d,  $J = 8.0$  Hz, 1H), 7.23 (d,  $J = 8.1$  Hz, 2H), 6.97 (d,  $J = 8.3$  Hz, 1H), 6.93 (s, 1H), 6.21 (d,  $J = 6.6$  Hz, 1H), 3.95 (t,  $J = 7.9$  Hz, 1H), 3.84 (t,  $J = 7.5$  Hz, 1H), 3.34 – 3.29 (m, 1H), 2.36 (s, 3H), 2.30 – 2.22 (m, 4H), 2.00 (dd,  $J = 12.2, 4.7$  Hz, 1H).  $^{13}\text{C NMR}$  (126 MHz,  $\text{CDCl}_3$ )  $\delta$  143.70, 139.14, 136.42, 133.21, 131.46, 129.47, 128.84, 127.27, 125.40, 112.70, 95.91, 66.37, 45.45, 33.57, 21.43, 20.77. Enantiomeric excess: 95%, determined by HPLC (Chiralpak OJ-3, hexane/*i*-PrOH = 70/30; flow rate 0.8 ml/min; 25 °C; 254 nm), first peak:  $t_R = 15.7$  min, second peak:  $t_R = 22.9$  min; HRMS (ESI)  $m/z$  calcd. for  $\text{C}_{18}\text{H}_{19}\text{NNaO}_3\text{S} [\text{M}+\text{Na}]^+ = 352.0978$ , found = 352.0975; IR spectrum (neat) ( $\text{cm}^{-1}$ ) = 2880, 1599, 1354, 1165, 1092, 991, 880, 814, 708, 662, 578.

<Chromatogram>

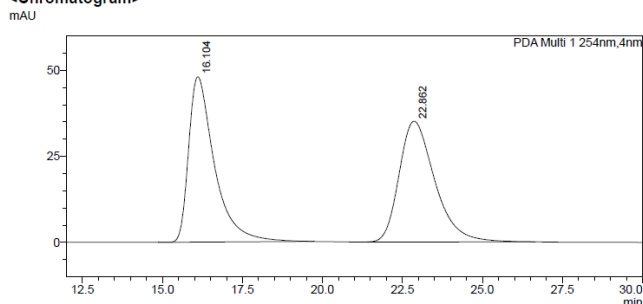

<Peak Table>

| Peak# | Ret. Time | Height | Height% | Area    | Area%   |
|-------|-----------|--------|---------|---------|---------|
| 1     | 16.104    | 48083  | 57.810  | 2700282 | 49.776  |
| 2     | 22.862    | 35091  | 42.190  | 2724602 | 50.224  |
| Total |           | 83173  | 100.000 | 5424884 | 100.000 |

<Chromatogram>

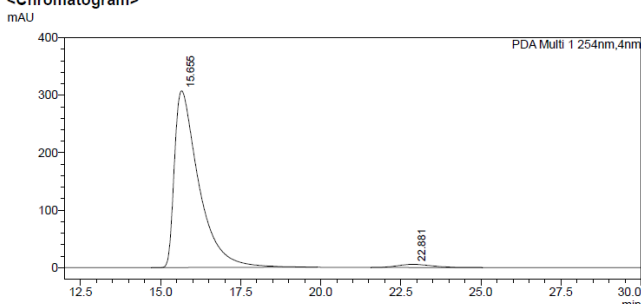

<Peak Table>

| Peak# | Ret. Time | Height | Height% | Area     | Area%   |
|-------|-----------|--------|---------|----------|---------|
| 1     | 15.655    | 307554 | 98.260  | 16312383 | 97.566  |
| 2     | 22.881    | 5445   | 1.740   | 406989   | 2.434   |
| Total |           | 312999 | 100.000 | 16719372 | 100.000 |

### (3aR,8aR)-5-methoxy-8-tosyl-3,3a,8,8a-tetrahydro-2H-furo[2,3-b]indole

## Supporting Information

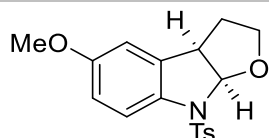

**3ea**; colorless solid (hexane/EtOAc = 5:1, 93% isolated yield); m.p. = 151-153 °C;  $[\alpha]_D^{20} = 81.647$  ( $c = 0.54$ ,  $\text{CHCl}_3$ );  $^1\text{H NMR}$  (500 MHz,  $\text{CDCl}_3$ )  $\delta$  7.78 (d,  $J = 8.2$  Hz, 2H), 7.33 (d,  $J = 8.8$  Hz, 1H), 7.22 (d,  $J = 8.2$  Hz, 2H), 6.72 (dd,  $J = 8.8, 2.6$  Hz, 1H), 6.68 (d,  $J = 2.4$  Hz, 1H), 6.17 (d,  $J = 6.5$  Hz, 1H), 3.96 (t,  $J = 8.1$  Hz, 1H), 3.82 – 3.79 (m, 1H), 3.74 (s, 3H), 3.37 – 3.32 (m, 1H), 2.36 (s, 3H), 2.30 – 2.22 (m, 1H), 2.00 (dd,  $J = 12.2, 4.8$  Hz, 1H).  $^{13}\text{C NMR}$  (126 MHz,  $\text{CDCl}_3$ )  $\delta$  156.59, 143.73, 136.15, 134.95, 133.08, 129.48, 127.19, 114.06, 113.24, 110.77, 96.15, 66.38, 55.56, 45.64, 33.46, 21.43. Enantiomeric excess: 90%, determined by HPLC (Chiralpak OJ-3, hexane/*i*-PrOH = 70/30; flow rate 0.8 ml/min; 25 °C; 254 nm), first peak:  $t_R = 26.7$  min, second peak:  $t_R = 44.4$  min; HRMS (ESI)  $m/z$  calcd. for  $\text{C}_{18}\text{H}_{19}\text{NNaO}_4\text{S}$   $[\text{M}+\text{Na}]^+ = 368.0927$ , found = 368.0919; IR spectrum (neat) ( $\text{cm}^{-1}$ ) = 2884, 1198, 1084, 961, 928, 881, 733, 669.

<Chromatogram>

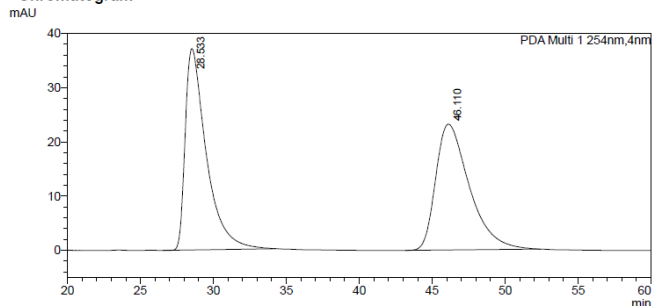

<Peak Table>

| Peak# | Ret. Time | Height | Height% | Area    | Area%   |
|-------|-----------|--------|---------|---------|---------|
| 1     | 28.533    | 37103  | 61.532  | 3727114 | 50.053  |
| 2     | 46.110    | 23196  | 38.468  | 3719208 | 49.947  |
| Total |           | 60299  | 100.000 | 7446321 | 100.000 |

<Chromatogram>

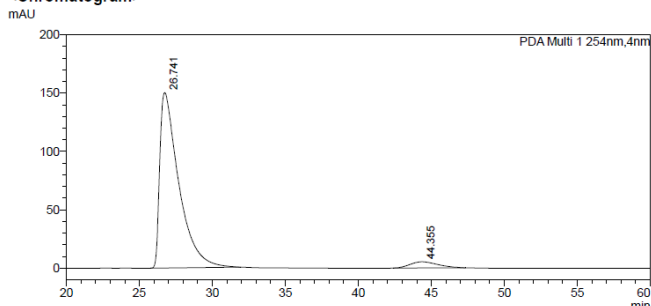

<Peak Table>

| Peak# | Ret. Time | Height | Height% | Area     | Area%   |
|-------|-----------|--------|---------|----------|---------|
| 1     | 26.741    | 150318 | 96.628  | 13597306 | 95.165  |
| 2     | 44.355    | 5245   | 3.372   | 690883   | 4.835   |
| Total |           | 155564 | 100.000 | 14288189 | 100.000 |

### (3*aR*,8*aR*)-8-tosyl-5-(trifluoromethyl)-3,3*a*,8,8*a*-tetrahydro-2*H*-furo[2,3-*b*]indole

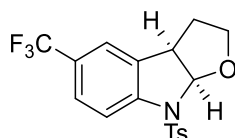

**3fa**; amorphous colorless solid (hexane/EtOAc = 8:1, 96% isolated yield); m.p. = 52-53 °C;  $[\alpha]_D^{20} = 4.896$  ( $c = 0.625$ ,  $\text{CHCl}_3$ );  $^1\text{H NMR}$  (500 MHz,  $\text{CDCl}_3$ )  $\delta$  7.89 (d,  $J = 8.4$  Hz, 2H), 7.45 – 7.41 (m, 2H), 7.38 (s, 1H), 7.28 (d,  $J = 8.1$  Hz, 2H), 6.35 (d,  $J = 6.6$  Hz, 1H), 4.02 – 3.96 (m, 2H), 3.31 – 3.26 (m, 1H), 2.39 (s, 3H), 2.37 – 2.230 (m, 1H), 2.05 (dd,  $J = 12.4, 4.6$  Hz, 1H).  $^{13}\text{C NMR}$  (126 MHz,  $\text{CDCl}_3$ )  $\delta$  144.38, 136.20, 132.02, 129.70, 127.41, 126.05 (q,  $J = 3.9$  Hz), 125.50 (q,  $J = 32.6$  Hz), 124.08 (q,  $J = 271.6$  Hz), 122.08 (q,  $J = 3.7$  Hz), 112.16, 96.13, 66.38, 45.26, 33.60, 21.50.  $^{19}\text{F NMR}$  (376 MHz,  $\text{CDCl}_3$ )  $\delta$  -61.64. Enantiomeric excess: 94%, determined by HPLC (Chiralpak AD-H, hexane/*i*-PrOH = 80/20; flow rate

## Supporting Information

0.8 ml/min; 25 °C; 254 nm), first peak:  $t_R = 11.2$  min, second peak:  $t_R = 14.5$  min; HRMS (ESI)  $m/z$  calcd. for  $C_{18}H_{16}F_3NNaO_3S$   $[M+Na]^+ = 406.0695$ , found = 406.0692; IR spectrum (neat) ( $cm^{-1}$ ) = 2880, 1620, 1445, 1337, 1285, 1167, 1121, 1078, 989, 961, 877, 721, 664, 596.

<Chromatogram>  
mAU

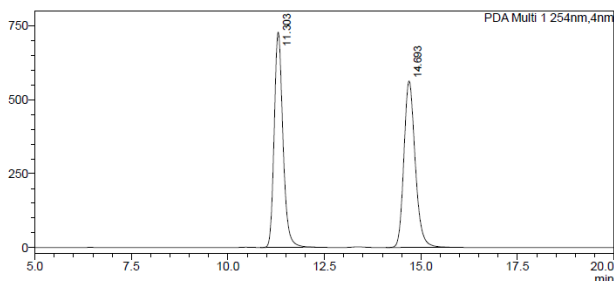

<Peak Table>

| Peak# | Ret. Time | Height  | Height% | Area     | Area%   |
|-------|-----------|---------|---------|----------|---------|
| 1     | 11.303    | 728323  | 56.404  | 11446117 | 49.974  |
| 2     | 14.693    | 562938  | 43.596  | 11457997 | 50.026  |
| Total |           | 1291261 | 100.000 | 22904114 | 100.000 |

<Chromatogram>  
mAU

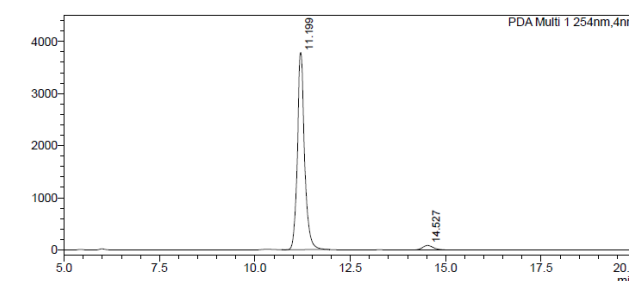

<Peak Table>

| Peak# | Ret. Time | Height  | Height% | Area     | Area%   |
|-------|-----------|---------|---------|----------|---------|
| 1     | 11.199    | 3785788 | 97.809  | 49396923 | 96.779  |
| 2     | 14.527    | 84789   | 2.191   | 1643813  | 3.221   |
| Total |           | 3870577 | 100.000 | 51040736 | 100.000 |

### (3aR,8aR)-8-tosyl-5-(trifluoromethoxy)-3,3a,8,8a-tetrahydro-2H-furo[2,3-b]indole

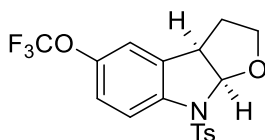

**3ga**; colorless solid (hexane/EtOAc = 8:1, 87% isolated yield); m.p. = 46-48 °C;  $[\alpha]_D^{20} = 12.339$  ( $c = 0.53$ ,  $CHCl_3$ );  $^1H$  NMR (500 MHz,  $CDCl_3$ )  $\delta$  7.86 (d,  $J = 8.3$  Hz, 2H), 7.35 (d,  $J = 8.7$  Hz, 1H), 7.28 (d,  $J = 9.1$  Hz, 2H), 7.03 – 7.00 (m, 2H), 6.30 (d,  $J = 6.6$  Hz, 1H), 4.00 (t,  $J = 8.0$  Hz, 1H), 3.92 (t,  $J = 7.6$  Hz, 1H), 3.35 – 3.30 (m, 1H), 2.39 (s, 3H), 2.36 – 2.28 (m, 1H), 2.01 (dd,  $J = 12.4, 4.7$  Hz, 1H).  $^{13}C$  NMR (126 MHz,  $CDCl_3$ )  $\delta$  145.11 (d,  $J = 1.8$  Hz), 144.21, 140.14, 136.23, 133.14, 129.67, 127.36, 121.33, 120.38 (q,  $J = 256.8$  Hz), 118.15, 113.21, 96.20, 66.37, 45.39, 33.55, 21.49.  $^{19}F$  NMR (376 MHz,  $CDCl_3$ )  $\delta$  -58.24. Enantiomeric excess: 87%, determined by HPLC (Chiralpak OJ-3, hexane/*i*-PrOH = 80/20; flow rate 0.8 ml/min; 25 °C; 254 nm), first peak:  $t_R = 15.0$  min, second peak:  $t_R = 19.6$  min; HRMS (ESI)  $m/z$  calcd. for  $C_{18}H_{16}F_3NNaO_4S$   $[M+Na]^+ = 422.0644$ , found = 422.0639; IR spectrum (neat) ( $cm^{-1}$ ) = 2874, 1599, 1485, 1357, 1250, 1161, 1094, 991, 872, 814, 662, 586.

<Chromatogram>  
mAU

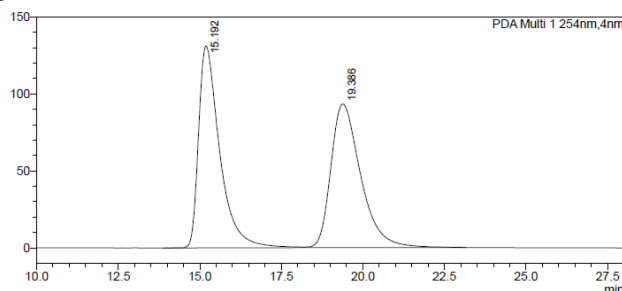

<Peak Table>

| Peak# | Ret. Time | Height | Height% | Area     | Area%   |
|-------|-----------|--------|---------|----------|---------|
| 1     | 15.192    | 131112 | 58.421  | 5919332  | 49.942  |
| 2     | 19.386    | 93316  | 41.579  | 5933087  | 50.058  |
| Total |           | 224428 | 100.000 | 11852419 | 100.000 |

<Chromatogram>  
mAU

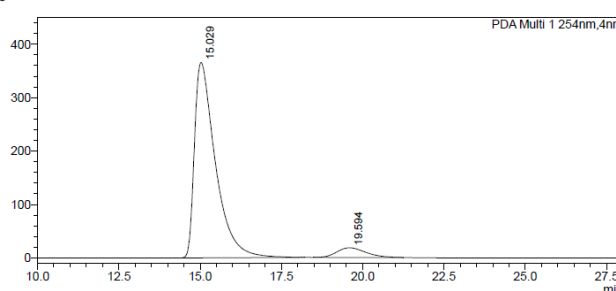

<Peak Table>

| Peak# | Ret. Time | Height | Height% | Area     | Area%   |
|-------|-----------|--------|---------|----------|---------|
| 1     | 15.029    | 365479 | 95.259  | 16405356 | 93.588  |
| 2     | 19.594    | 18188  | 4.741   | 1123974  | 6.412   |
| Total |           | 383667 | 100.000 | 17529330 | 100.000 |



## Supporting Information

### (3*aR*,8*aR*)-6-fluoro-8-tosyl-3,3*a*,8,8*a*-tetrahydro-2*H*-furo[2,3-*b*]indole

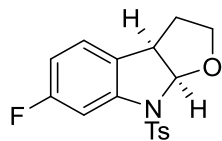

**3ha**; colorless solid (hexane/EtOAc = 8:1, 75% isolated yield); m.p. = 51-53 °C;  $[\alpha]_D^{20} = 10.2$  ( $c = 0.5$ , CHCl<sub>3</sub>); <sup>1</sup>H NMR (500 MHz, CDCl<sub>3</sub>) δ 7.87 (d,  $J = 8.4$  Hz, 2H), 7.27 (d,  $J = 9.2$  Hz, 2H), 7.10 (dd,  $J = 9.9, 2.3$  Hz, 1H), 7.06 – 7.01 (m, 1H), 6.67 (td,  $J = 8.6, 2.3$  Hz, 1H), 6.29 (d,  $J = 6.6$  Hz, 1H), 3.97 (t,  $J = 8.1$  Hz, 1H), 3.87 (t,  $J = 7.4$  Hz, 1H), 3.32 – 3.27 (m, 1H), 2.39 (s, 3H), 2.31 – 2.23 (m, 1H), 1.98 (dd,  $J = 12.2, 4.7$  Hz, 1H). <sup>13</sup>C NMR (126 MHz, CDCl<sub>3</sub>) δ 163.89, 161.94, 144.18, 142.73 (d,  $J = 11.9$  Hz), 136.26, 129.65, 127.37, 126.69 (d,  $J = 2.6$  Hz), 125.52 (d,  $J = 10.0$  Hz), 110.02 (d,  $J = 22.9$  Hz), 100.99 (d,  $J = 28.6$  Hz), 96.59, 66.40, 44.93, 33.74, 21.50. <sup>19</sup>F NMR (282 MHz, CDCl<sub>3</sub>) δ -112.53. Enantiomeric excess: 95%, determined by HPLC (Chiralpak OJ-3, hexane/*i*-PrOH = 70/30; flow rate 0.8 ml/min; 25 °C; 254 nm), first peak:  $t_R = 13.5$  min, second peak:  $t_R = 16.5$  min; HRMS (ESI)  $m/z$  calcd. for C<sub>17</sub>H<sub>16</sub>FNNaO<sub>3</sub>S [M+Na]<sup>+</sup> = 356.0727, found = 356.0719; IR spectrum (neat) (cm<sup>-1</sup>) = 2874, 1603, 1437, 1350, 1161, 1143, 1099, 999, 864, 813, 706, 664, 583.

<Chromatogram>  
mAU

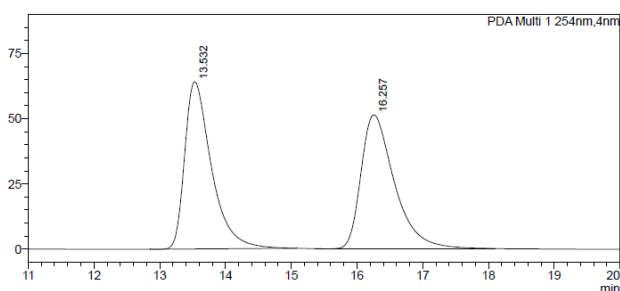

<Peak Table>

| Peak# | Ret. Time | Area    | Height | Conc. | Unit | Mark | Name |
|-------|-----------|---------|--------|-------|------|------|------|
| 1     | 13.532    | 1817253 | 64110  | 0.000 |      | M    |      |
| 2     | 16.257    | 1808848 | 51278  | 0.000 |      | M    |      |
| Total |           | 3626100 | 115389 |       |      |      |      |

<Chromatogram>  
mAU

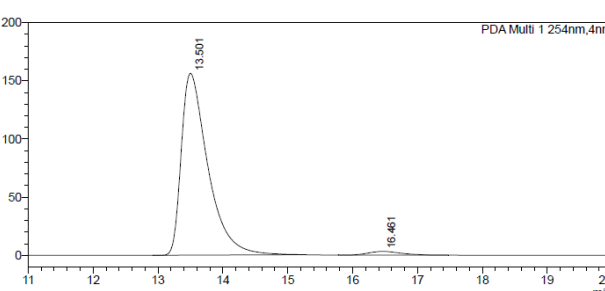

<Peak Table>

| Peak# | Ret. Time | Height | Height% | Area    | Area%   |
|-------|-----------|--------|---------|---------|---------|
| 1     | 13.501    | 156241 | 98.004  | 4461526 | 97.547  |
| 2     | 16.461    | 3182   | 1.996   | 112175  | 2.453   |
| Total |           | 159423 | 100.000 | 4573701 | 100.000 |

### (3*aR*,8*aR*)-6-chloro-8-tosyl-3,3*a*,8,8*a*-tetrahydro-2*H*-furo[2,3-*b*]indole

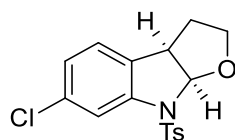

**3ia**; colorless solid (hexane/EtOAc = 8:1, 67% isolated yield); m.p. = 93-94 °C;  $[\alpha]_D^{20} = 10.782$  ( $c = 0.46$ , CHCl<sub>3</sub>); <sup>1</sup>H NMR (500 MHz, CDCl<sub>3</sub>) δ 7.87 (d,  $J = 8.3$  Hz, 2H), 7.37 (d,  $J = 1.8$  Hz, 1H), 7.28 (d,  $J = 8.1$  Hz, 2H), 7.04 (d,  $J = 8.0$  Hz, 1H), 6.95 (dd,  $J = 8.0, 1.8$  Hz, 1H), 6.27 (d,  $J = 6.6$  Hz, 1H), 3.97 (t,  $J = 8.0$  Hz, 1H), 3.89 – 3.86 (m, 1H), 3.30 – 3.25 (m, 1H), 2.40 (s, 3H), 2.32 – 2.24 (m, 1H), 1.97 (dd,  $J = 12.3, 4.7$  Hz, 1H). <sup>13</sup>C NMR (126 MHz, CDCl<sub>3</sub>) δ 144.20, 142.58, 136.25, 134.10, 129.85, 129.68, 127.36,

## Supporting Information

125.60, 123.48, 113.05, 96.29, 66.37, 45.08, 33.63, 21.52. Enantiomeric excess: 92%, determined by HPLC (Chiralpak OJ-3, hexane/*i*-PrOH = 70/30; flow rate 0.8 ml/min; 25 °C; 254 nm), first peak:  $t_R$  = 13.9 min, second peak:  $t_R$  = 18.5 min; HRMS (ESI)  $m/z$  calcd. for  $C_{17}H_{16}CINNaO_3S$   $[M+Na]^+$  = 372.0432, found = 372.0420; IR spectrum (neat) ( $cm^{-1}$ ) = 2874, 1418, 1356, 1169, 1092, 1078, 993, 961, 881, 665, 583.

<Chromatogram>  
mAU

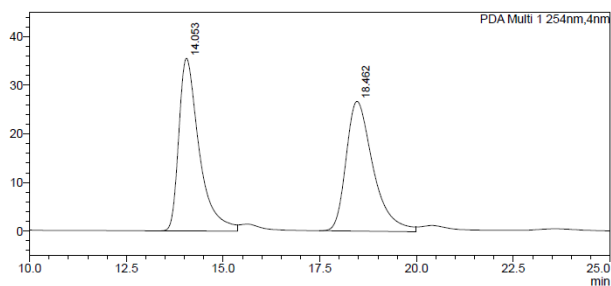

<Peak Table>

| Peak# | Ret. Time | Height | Height% | Area    | Area%   |
|-------|-----------|--------|---------|---------|---------|
| 1     | 14.053    | 35490  | 57.075  | 1299549 | 50.002  |
| 2     | 18.462    | 26692  | 42.925  | 1299456 | 49.998  |
| Total |           | 62182  | 100.000 | 2599005 | 100.000 |

<Chromatogram>  
mAU

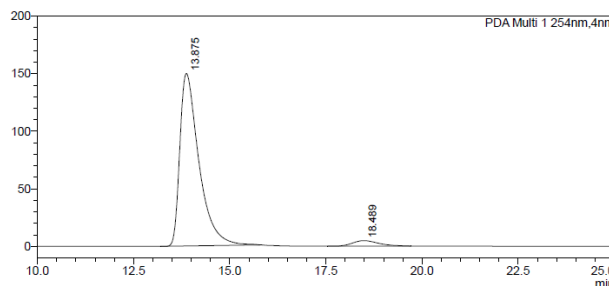

<Peak Table>

| Peak# | Ret. Time | Height | Height% | Area    | Area%   |
|-------|-----------|--------|---------|---------|---------|
| 1     | 13.875    | 149955 | 96.925  | 5183778 | 95.913  |
| 2     | 18.489    | 4757   | 3.075   | 220913  | 4.087   |
| Total |           | 154712 | 100.000 | 5404691 | 100.000 |

### (3*aR*,8*aR*)-6-methyl-8-tosyl-3,3*a*,8,8*a*-tetrahydro-2*H*-furo[2,3-*b*]indole

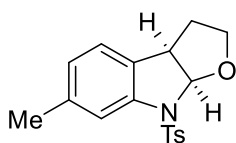

**3ja**; amorphous colorless solid (hexane/EtOAc = 8:1, 66% isolated yield); m.p. = 98-99 °C;  $[\alpha]_D^{20}$  = 21.220 ( $c$  = 0.5,  $CHCl_3$ );  $^1H$  NMR (500 MHz,  $CDCl_3$ )  $\delta$  7.86 (d,  $J$  = 8.3 Hz, 2H), 7.25 (d,  $J$  = 9.4 Hz, 2H), 7.20 (s, 1H), 7.00 (d,  $J$  = 7.6 Hz, 1H), 6.80 (d,  $J$  = 7.6 Hz, 1H), 6.24 (d,  $J$  = 6.6 Hz, 1H), 3.95 (t,  $J$  = 8.0 Hz, 1H), 3.85 (t,  $J$  = 7.5 Hz, 1H), 3.34 – 3.28 (m, 1H), 2.38 (s, 3H), 2.31 (s, 3H), 2.28 – 2.23 (m, 1H), 1.98 (dd,  $J$  = 12.2, 4.6 Hz, 1H).  $^{13}C$  NMR (126 MHz,  $CDCl_3$ )  $\delta$  143.76, 141.62, 138.50, 136.67, 129.52, 128.42, 127.33, 124.44, 124.29, 113.49, 96.08, 66.38, 45.18, 33.72, 21.66, 21.49. Enantiomeric excess: 93%, determined by HPLC (Chiralpak OJ-3, hexane/*i*-PrOH = 70/30; flow rate 0.8 ml/min; 25 °C; 254 nm), first peak:  $t_R$  = 11.6 min, second peak:  $t_R$  = 17.1 min; HRMS (ESI)  $m/z$  calcd. for  $C_{18}H_{19}NNaO_3S$   $[M+Na]^+$  = 352.0978, found = 352.0975; IR spectrum (neat) ( $cm^{-1}$ ) = 2886, 1612, 1493, 1350, 1165, 1094, 961, 928, 814, 733, 665, 584.

## Supporting Information

<Chromatogram>

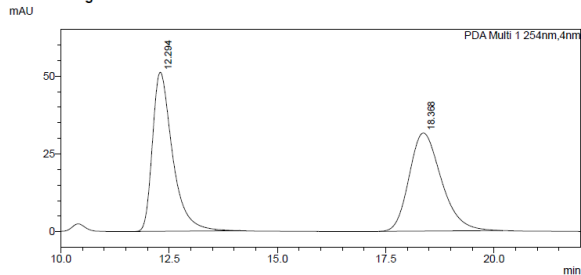

<Peak Table>

| Peak# | Ret. Time | Height | Height% | Area    | Area%   |
|-------|-----------|--------|---------|---------|---------|
| 1     | 12.294    | 51110  | 61.849  | 1651408 | 50.288  |
| 2     | 18.368    | 31526  | 38.151  | 1632495 | 49.712  |
| Total |           | 82636  | 100.000 | 3283902 | 100.000 |

<Chromatogram>

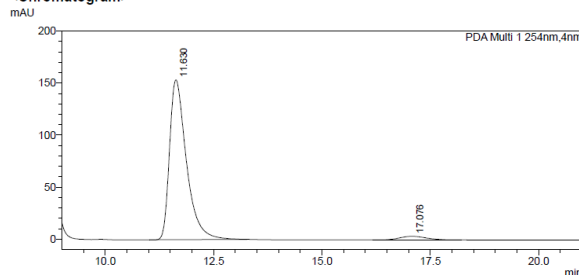

<Peak Table>

| Peak# | Ret. Time | Height | Height% | Area    | Area%   |
|-------|-----------|--------|---------|---------|---------|
| 1     | 11.630    | 153725 | 97.738  | 4174517 | 96.472  |
| 2     | 17.076    | 3557   | 2.262   | 152657  | 3.528   |
| Total |           | 157282 | 100.000 | 4327173 | 100.000 |

### methyl (3*R*,8*aR*)-8-tosyl-3,3*a*,8,8*a*-tetrahydro-2*H*-furo[2,3-*b*]indole-6-carboxylate

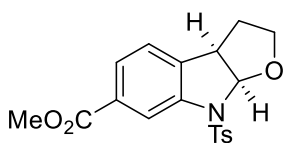

**3ka**; colorless solid (hexane/EtOAc = 5:1, 72% isolated yield); m.p. = 173-175 °C;  $[\alpha]_D^{20} = 16.8$  ( $c = 0.625$ , CHCl<sub>3</sub>); <sup>1</sup>H NMR (500 MHz, CDCl<sub>3</sub>) δ 8.00 (d,  $J = 1.1$  Hz, 1H), 7.89 (d,  $J = 8.3$  Hz, 2H), 7.71 (dd,  $J = 7.8, 1.3$  Hz, 1H), 7.27 (d,  $J = 10$  Hz, 2H), 7.20 (d,  $J = 7.8$  Hz, 1H), 6.32 (d,  $J = 6.6$  Hz, 1H), 4.00 – 3.93 (m, 2H), 3.91 (s, 3H), 3.30 – 3.24 (m, 1H), 2.38 (s, 3H), 2.36 – 2.29 (m, 1H), 2.03 (dd,  $J = 12.0, 4.4$  Hz, 1H). <sup>13</sup>C NMR (126 MHz, CDCl<sub>3</sub>) δ 166.49, 144.12, 141.82, 136.59, 136.24, 130.66, 129.63, 127.41, 125.25, 124.72, 113.33, 95.99, 66.34, 52.23, 45.50, 33.52, 21.50. Enantiomeric excess: 80%, determined by HPLC (Chiralpak OJ-3, hexane/*i*-PrOH = 60/40; flow rate 0.8 ml/min; 25 °C; 254 nm), first peak:  $t_R = 21.1$  min, second peak:  $t_R = 40.0$  min; HRMS (ESI)  $m/z$  calcd. for C<sub>19</sub>H<sub>19</sub>NNaO<sub>5</sub>S [M+Na]<sup>+</sup> = 396.0876, found = 396.0866; IR spectrum (neat) (cm<sup>-1</sup>) = 2884, 1368, 1088, 961, 928, 881, 750, 665, 586.

<Chromatogram>

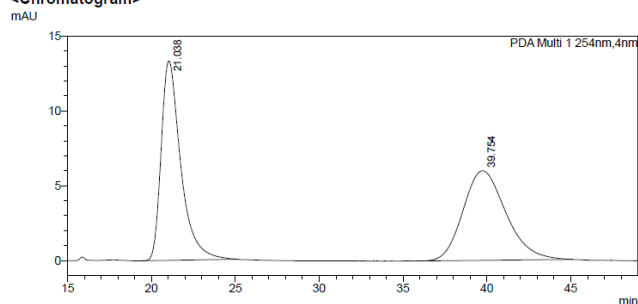

<Peak Table>

| Peak# | Ret. Time | Area    | Height | Conc. | Unit | Mark | Name |
|-------|-----------|---------|--------|-------|------|------|------|
| 1     | 21.038    | 1080711 | 13341  | 0.000 |      | M    |      |
| 2     | 39.754    | 1065597 | 5993   | 0.000 |      | M    |      |
| Total |           | 2146308 | 19334  |       |      |      |      |

<Chromatogram>

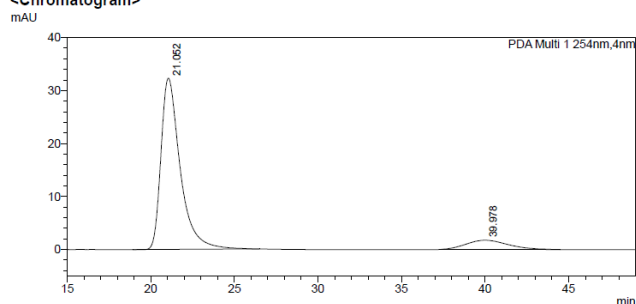

<Peak Table>

| Peak# | Ret. Time | Height | Height% | Area    | Area%   |
|-------|-----------|--------|---------|---------|---------|
| 1     | 21.052    | 32314  | 94.952  | 2585326 | 89.731  |
| 2     | 39.978    | 1718   | 5.048   | 295858  | 10.269  |
| Total |           | 34032  | 100.000 | 2881184 | 100.000 |

### (3*R*,8*aR*)-8-tosyl-6-(trifluoromethyl)-3,3*a*,8,8*a*-tetrahydro-2*H*-furo[2,3-*b*]indole

## Supporting Information

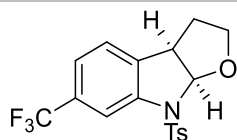

**3la**; colorless solid (hexane/EtOAc = 8:1, 84% isolated yield); m.p. = 124-126 °C;  $[\alpha]_D^{20} = 2.8$  ( $c = 0.5$ ,  $\text{CHCl}_3$ );  $^1\text{H NMR}$  (500 MHz,  $\text{CDCl}_3$ )  $\delta$  7.87 (d,  $J = 8.3$  Hz, 2H), 7.61 (s, 1H), 7.29 – 7.24 (m, 4H), 6.32 (d,  $J = 6.6$  Hz, 1H), 4.01 – 3.94 (m, 2H), 3.30 – 3.25 (m, 1H), 2.39 (s, 3H), 2.36 – 2.30 (m, 1H), 2.02 (dd,  $J = 12.5, 4.9$  Hz, 1H).  $^{13}\text{C NMR}$  (126 MHz,  $\text{CDCl}_3$ )  $\delta$  144.37, 142.02, 136.07, 135.33, 130.88 (q,  $J = 32.4$  Hz), 129.71, 127.39, 125.22, 123.82 (q,  $J = 272.5$  Hz), 120.46 (q,  $J = 3.9$  Hz), 109.43 (q,  $J = 3.9$  Hz), 96.07, 66.36, 45.40, 33.55, 21.50.  $^{19}\text{F NMR}$  (376 MHz,  $\text{CDCl}_3$ )  $\delta$  -62.34. Enantiomeric excess: 85%, determined by HPLC (Chiralpak OJ-3, hexane/*i*-PrOH = 70/30; flow rate 0.8 ml/min; 25 °C; 254 nm), first peak:  $t_R = 10.3$  min, second peak:  $t_R = 13.0$  min; HRMS (ESI)  $m/z$  calcd. for  $\text{C}_{18}\text{H}_{16}\text{F}_3\text{NNaO}_3\text{S}$   $[\text{M}+\text{Na}]^+ = 406.0695$ , found = 406.0691; IR spectrum (neat) ( $\text{cm}^{-1}$ ) = 2884, 1435, 1361, 1317, 1168, 1121, 1092, 1078, 961, 732, 664.

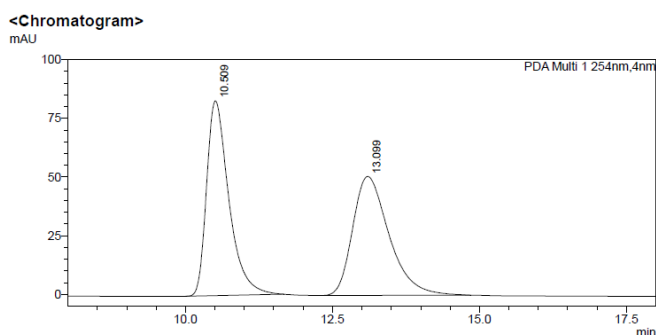

<Peak Table>  
PDA Ch1 254nm

| Peak# | Ret. Time | Height | Height% | Area    | Area%   |
|-------|-----------|--------|---------|---------|---------|
| 1     | 10.509    | 83016  | 62.094  | 2194719 | 50.015  |
| 2     | 13.099    | 50679  | 37.906  | 2183448 | 49.985  |
| Total |           | 133694 | 100.000 | 4368167 | 100.000 |

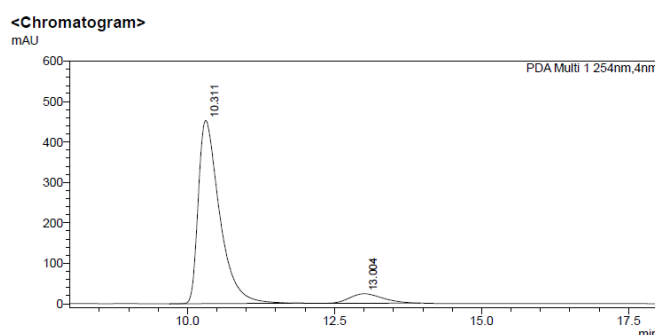

<Peak Table>  
PDA Ch1 254nm

| Peak# | Ret. Time | Height | Height% | Area     | Area%   |
|-------|-----------|--------|---------|----------|---------|
| 1     | 10.311    | 452849 | 95.109  | 11424898 | 92.615  |
| 2     | 13.004    | 23286  | 4.891   | 910990   | 7.385   |
| Total |           | 476135 | 100.000 | 12335888 | 100.000 |

### (3aR,8aR)-4-fluoro-8-tosyl-3,3a,8,8a-tetrahydro-2H-furo[2,3-b]indole

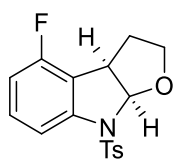

**3ma**; colorless solid (hexane/EtOAc = 8:1, 81% isolated yield); m.p. = 94-95 °C;  $[\alpha]_D^{20} = 17.232$  ( $c = 0.625$ ,  $\text{CHCl}_3$ );  $^1\text{H NMR}$  (500 MHz,  $\text{CDCl}_3$ )  $\delta$  7.86 (d,  $J = 8.4$  Hz, 2H), 7.27 – 7.26 (m, 2H), 7.18 – 7.12 (m, 2H), 6.69 – 6.65 (m, 1H), 6.30 (d,  $J = 6.7$  Hz, 1H), 4.02 – 3.99 (m, 2H), 3.36 – 3.31 (m, 1H), 2.38 (s, 3H), 2.28 – 2.20 (m, 1H), 2.14 (dd,  $J = 12.5, 4.9$  Hz, 1H).  $^{13}\text{C NMR}$  (126 MHz,  $\text{CDCl}_3$ )  $\delta$  160.00, 158.03, 144.11, 143.60 (d,  $J = 8.4$  Hz), 136.21, 130.18 (d,  $J = 8.4$  Hz), 129.58, 127.33, 117.42 (d,  $J = 20.6$  Hz), 110.18 (d,  $J = 20.0$  Hz), 108.49 (d,  $J = 3.3$  Hz), 96.22, 66.47, 42.77, 31.84, 21.47.  $^{19}\text{F NMR}$  (376 MHz,  $\text{CDCl}_3$ )  $\delta$  -118.56. Enantiomeric excess: 93%, determined by HPLC (Chiralpak OJ-3, hexane/*i*-PrOH = 70/30; flow rate 0.8 ml/min; 25 °C; 254 nm), first peak:  $t_R = 14.3$  min, second peak:  $t_R = 18.9$  min; HRMS

## Supporting Information

(ESI)  $m/z$  calcd. for  $C_{17}H_{16}FNNaO_3S$   $[M+Na]^+ = 356.0727$ , found = 356.0724; IR spectrum (neat) ( $cm^{-1}$ ) = 2897, 1626, 1362, 1240, 1171, 1088, 961, 881, 777, 733, 664.

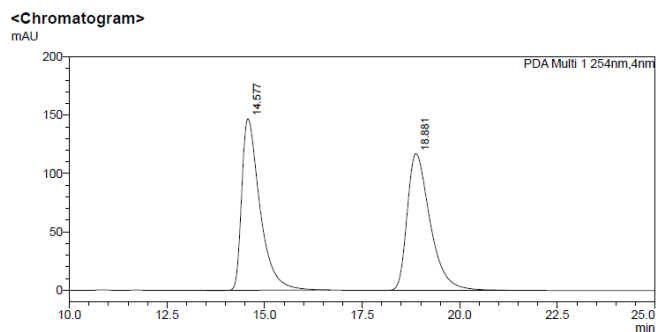

<Peak Table>  
PDA Ch1 254nm

| Peak# | Ret. Time | Height | Height% | Area    | Area%   |
|-------|-----------|--------|---------|---------|---------|
| 1     | 14.577    | 147176 | 55.657  | 4775907 | 49.979  |
| 2     | 18.881    | 117256 | 44.343  | 4779971 | 50.021  |
| Total |           | 264432 | 100.000 | 9555878 | 100.000 |

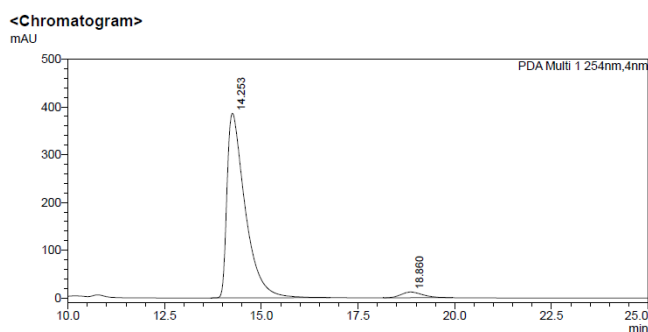

<Peak Table>  
PDA Ch1 254nm

| Peak# | Ret. Time | Height | Height% | Area     | Area%   |
|-------|-----------|--------|---------|----------|---------|
| 1     | 14.253    | 386752 | 97.023  | 12618785 | 96.477  |
| 2     | 18.860    | 11868  | 2.977   | 460726   | 3.523   |
| Total |           | 398620 | 100.000 | 13079511 | 100.000 |

### (3aR,8aR)-4-methyl-8-tosyl-3,3a,8,8a-tetrahydro-2H-furo[2,3-b]indole

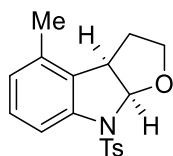

**3na**; amorphous colorless solid (hexane/EtOAc = 8:1, 51% isolated yield); m.p. = 57-59 °C;  $[\alpha]_D^{20} = 7.44$  ( $c = 0.5$ ,  $CHCl_3$ );  $^1H$  NMR (500 MHz,  $CDCl_3$ )  $\delta$  7.85 (d,  $J = 8.3$  Hz, 2H), 7.24 (dd,  $J = 8.3, 2.7$  Hz, 3H), 7.08 (t,  $J = 7.9$  Hz, 1H), 6.79 (d,  $J = 7.6$  Hz, 1H), 6.29 (d,  $J = 6.9$  Hz, 1H), 4.00 – 3.96 (m, 1H), 3.89 – 3.85 (m, 1H), 3.41 – 3.36 (m, 1H), 2.37 (s, 3H), 2.31 – 2.22 (m, 4H), 1.97 (dd,  $J = 12.2, 5.1$  Hz, 1H).  $^{13}C$  NMR (126 MHz,  $CDCl_3$ )  $\delta$  143.81, 141.30, 136.47, 134.52, 129.54, 128.34, 127.38, 124.76, 110.20, 95.91, 65.93, 44.65, 32.19, 21.51, 18.50. Enantiomeric excess: 93%, determined by HPLC (Chiralpak OJ-3, hexane/*i*-PrOH = 70/30; flow rate 0.8 ml/min; 25 °C; 254 nm), first peak:  $t_R = 13.9$  min, second peak:  $t_R = 20.0$  min; HRMS (ESI)  $m/z$  calcd. for  $C_{18}H_{19}NNaO_3S$   $[M+Na]^+ = 352.0978$ , found = 352.0972; IR spectrum (neat) ( $cm^{-1}$ ) = 2886, 1458, 1356, 1250, 1167, 1084, 1051, 961, 927, 881, 775, 662, 578.

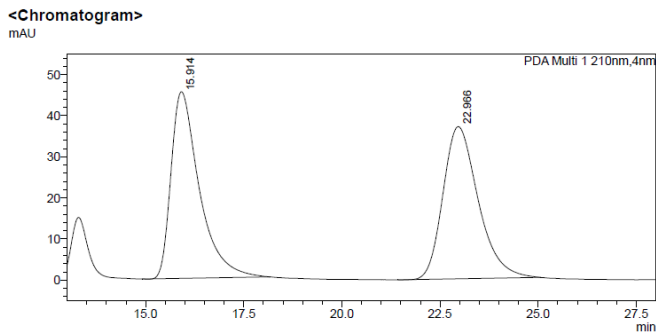

<Peak Table>  
PDA Ch1 210nm

| Peak# | Ret. Time | Height | Height% | Area    | Area%   |
|-------|-----------|--------|---------|---------|---------|
| 1     | 15.914    | 45410  | 55.085  | 2276770 | 49.608  |
| 2     | 22.966    | 37027  | 44.915  | 2312714 | 50.392  |
| Total |           | 82437  | 100.000 | 4589484 | 100.000 |

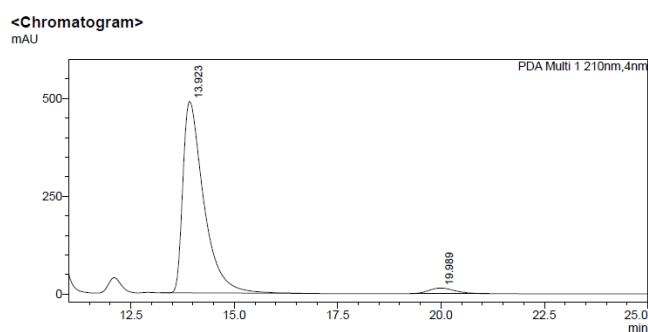

<Peak Table>  
PDA Ch1 210nm

| Peak# | Ret. Time | Height | Height% | Area     | Area%   |
|-------|-----------|--------|---------|----------|---------|
| 1     | 13.923    | 488811 | 97.145  | 17137530 | 96.481  |
| 2     | 19.989    | 14366  | 2.855   | 625046   | 3.519   |
| Total |           | 503177 | 100.000 | 17762576 | 100.000 |

## Supporting Information

### (3aR,8aR)-7-fluoro-8-tosyl-3,3a,8,8a-tetrahydro-2H-furo[2,3-b]indole

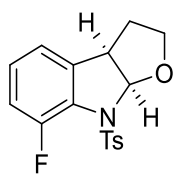

**30a**; colorless solid (hexane/EtOAc = 8:1, 66% isolated yield); m.p. = 66-67 °C;  $[\alpha]_D^{20} = 3.18$  ( $c = 0.5$ ,  $\text{CHCl}_3$ );  $^1\text{H NMR}$  (500 MHz,  $\text{CDCl}_3$ )  $\delta$  7.94 (d,  $J = 7.4$  Hz, 2H), 7.29 (d,  $J = 8.4$  Hz, 2H), 6.96 – 6.94 (m, 2H), 6.88 – 6.84 (m, 1H), 6.60 (d,  $J = 6.4$  Hz, 1H), 4.09 – 4.03 (m, 2H), 3.47 – 3.42 (m, 1H), 2.41 (s, 3H), 2.39 – 2.33 (m, 1H), 2.07 (dd,  $J = 12.3, 4.8$  Hz, 1H).  $^{13}\text{C NMR}$  (126 MHz,  $\text{CDCl}_3$ )  $\delta$  150.22, 148.23, 143.52, 137.76 (d,  $J = 1.6$  Hz), 136.14 (d,  $J = 2.8$  Hz), 129.31, 128.61 (d,  $J = 10.5$  Hz), 127.52 (d,  $J = 2.2$  Hz), 124.92 (d,  $J = 6.6$  Hz), 120.35 (d,  $J = 3.3$  Hz), 116.29 (d,  $J = 20.3$  Hz), 96.35, 66.43, 45.83, 33.60, 21.52.  $^{19}\text{F NMR}$  (376 MHz,  $\text{CDCl}_3$ )  $\delta$  -120.54. Enantiomeric excess: 87%, determined by HPLC (Chiralpak OJ-3, hexane/*i*-PrOH = 70/30; flow rate 0.8 ml/min; 25 °C; 254 nm), first peak:  $t_R = 18.1$  min, second peak:  $t_R = 38.4$  min; HRMS (ESI)  $m/z$  calcd. for  $\text{C}_{17}\text{H}_{16}\text{FNNaO}_3\text{S}$   $[\text{M}+\text{Na}]^+ = 356.0727$ , found = 356.0718; IR spectrum (neat) ( $\text{cm}^{-1}$ ) = 2876, 1597, 1348, 1258, 1165, 1094, 1074, 988, 961, 816, 779, 660, 596.

<Chromatogram>  
mAU

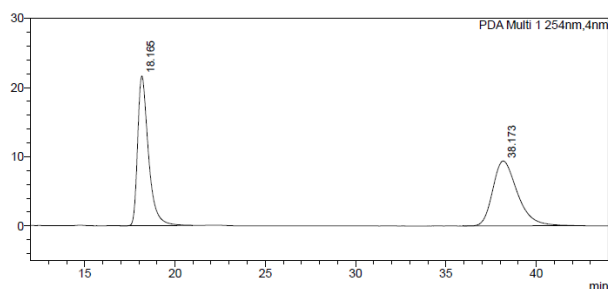

<Peak Table>

| Peak# | Ret. Time | Height | Height% | Area    | Area%   |
|-------|-----------|--------|---------|---------|---------|
| 1     | 18.165    | 21634  | 69.761  | 898522  | 50.248  |
| 2     | 38.173    | 9377   | 30.239  | 889664  | 49.752  |
| Total |           | 31011  | 100.000 | 1788186 | 100.000 |

<Chromatogram>  
mAU

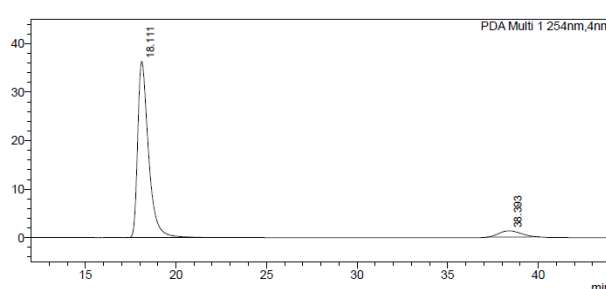

<Peak Table>

| Peak# | Ret. Time | Height | Height% | Area    | Area%   |
|-------|-----------|--------|---------|---------|---------|
| 1     | 18.111    | 36312  | 96.555  | 1505511 | 93.244  |
| 2     | 38.303    | 1295   | 3.445   | 109079  | 6.756   |
| Total |           | 37608  | 100.000 | 1614590 | 100.000 |

### (3aR,8aR)-5,6-difluoro-8-tosyl-3,3a,8,8a-tetrahydro-2H-furo[2,3-b]indole

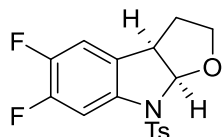

**3pa**; colorless solid (hexane/EtOAc = 8:1, 84% isolated yield); m.p. = 123-125 °C;  $[\alpha]_D^{20} = 20.537$  ( $c = 0.54$ ,  $\text{CHCl}_3$ );  $^1\text{H NMR}$  (500 MHz,  $\text{CDCl}_3$ )  $\delta$  7.83 (d,  $J = 8.3$  Hz, 2H), 7.28 (d,  $J = 8.1$  Hz, 2H), 7.25 – 7.23 (m, 1H), 6.95 – 6.91 (m, 1H), 6.25 (d,  $J = 6.6$  Hz, 1H), 3.99 (t,  $J = 8.0$  Hz, 1H), 3.85 (t,  $J = 7.5$  Hz, 1H), 3.33 – 3.28 (m, 1H), 2.40 (s, 3H), 2.32 – 2.24 (m, 1H), 1.96 (dd,  $J = 12.4, 4.6$  Hz, 1H).  $^{13}\text{C NMR}$

## Supporting Information

(126 MHz, CDCl<sub>3</sub>) δ 151.07 (d, *J* = 13.8 Hz), 149.10 (d, *J* = 13.8 Hz), 148.02 (d, *J* = 13.7 Hz), 146.08 (d, *J* = 13.7 Hz), 144.35, 137.51 (dd, *J* = 9.6, 2.3 Hz), 135.94, 129.73, 127.31, 126.90 (dd, *J* = 5.9, 3.4 Hz), 113.41 (d, *J* = 19.5 Hz), 102.84 (d, *J* = 23.8 Hz), 96.42, 66.39, 45.20, 33.55, 21.52. <sup>19</sup>F NMR (376 MHz, CDCl<sub>3</sub>) δ -136.09 (d, *J* = 20.4 Hz), -143.62 (d, *J* = 20.3 Hz). Enantiomeric excess: 89%, determined by HPLC (Chiralpak OJ-3, hexane/*i*-PrOH = 70/30; flow rate 0.8 ml/min; 25 °C; 254 nm), first peak: *t*<sub>R</sub> = 16.1 min, second peak: *t*<sub>R</sub> = 20.4 min; HRMS (ESI) *m/z* calcd. for C<sub>17</sub>H<sub>15</sub>F<sub>2</sub>NNaO<sub>3</sub>S [M+Na]<sup>+</sup> = 374.0633, found = 374.0627; IR spectrum (neat) (cm<sup>-1</sup>) = 2882, 1447, 1368, 1202, 1167, 1088, 961, 928, 881, 662, 610.

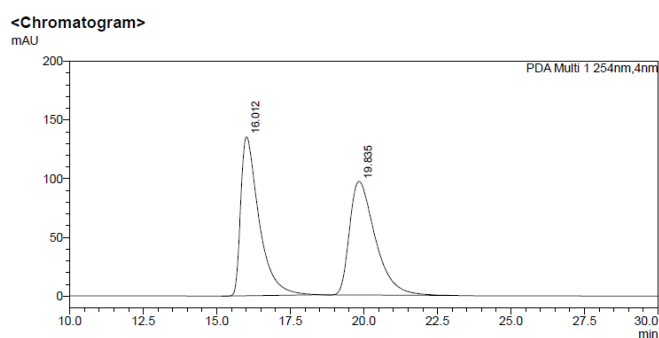

<Peak Table>

| Peak# | Ret. Time | Area     | Height | Conc. | Unit | Mark | Name |
|-------|-----------|----------|--------|-------|------|------|------|
| 1     | 16.012    | 5961037  | 135252 | 0.000 |      | M    |      |
| 2     | 19.835    | 5881646  | 96632  | 0.000 |      | M    |      |
| Total |           | 11742684 | 231944 |       |      |      |      |

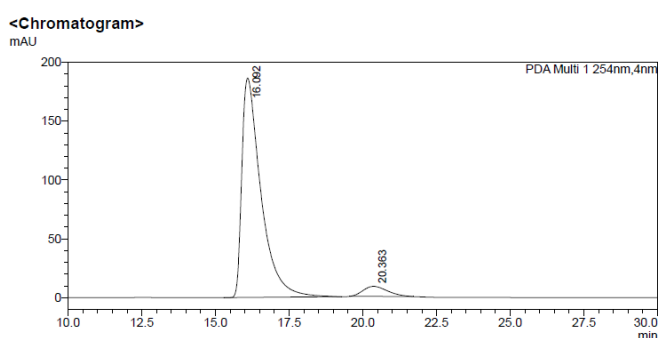

<Peak Table>

| Peak# | Ret. Time | Height | Height% | Area    | Area%   |
|-------|-----------|--------|---------|---------|---------|
| 1     | 16.062    | 186423 | 95.625  | 8398780 | 94.454  |
| 2     | 20.363    | 8529   | 4.375   | 493108  | 5.546   |
| Total |           | 194953 | 100.000 | 8891888 | 100.000 |

### (7*aR*,10*aR*)-7-tosyl-7*a*,9,10,10*a*-tetrahydro-7*H*-furo[3',2':4,5]pyrrolo[3,2-*f*]quinoxaline

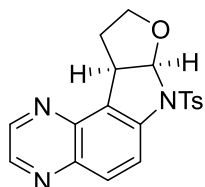

**3qa**; colorless solid (hexane/EtOAc = 2:1, 87% isolated yield); m.p. = 210-211 °C; [ $\alpha$ ]<sub>D</sub><sup>20</sup> = 96.898 (*c* = 0.4, CHCl<sub>3</sub>); <sup>1</sup>H NMR (500 MHz, CDCl<sub>3</sub>) δ 8.75 (dd, *J* = 17.0, 1.8 Hz, 2H), 8.01 (q, *J* = 9.2 Hz, 2H), 7.89 (d, *J* = 8.4 Hz, 2H), 7.27 (d, *J* = 6.8 Hz, 2H), 6.47 (d, *J* = 6.8 Hz, 1H), 4.44 – 4.41 (m, 1H), 4.06 – 4.03 (m, 1H), 3.35 – 3.30 (m, 1H), 2.48 – 2.40 (m, 2H), 2.37 (s, 3H). <sup>13</sup>C NMR (126 MHz, CDCl<sub>3</sub>) δ 145.04, 144.32, 143.22, 142.63, 140.62, 139.89, 136.29, 130.85, 129.78, 127.28, 125.12, 117.39, 97.04, 66.67, 44.51, 32.44, 21.51. Enantiomeric excess: 95%, determined by HPLC (Chiralpak OJ-3, hexane/*i*-PrOH = 60/40; flow rate 0.8 ml/min; 25 °C; 254 nm), first peak: *t*<sub>R</sub> = 24.2 min, second peak: *t*<sub>R</sub> = 30.3 min; HRMS (ESI) *m/z* calcd. for C<sub>19</sub>H<sub>17</sub>N<sub>3</sub>NaO<sub>3</sub>S [M+Na]<sup>+</sup> = 390.0883, found = 390.0881; IR spectrum (neat) (cm<sup>-1</sup>) = 2884, 1362, 1348, 1258, 1161, 1080, 961, 947, 928, 881, 619, 588.

## Supporting Information

<Chromatogram>

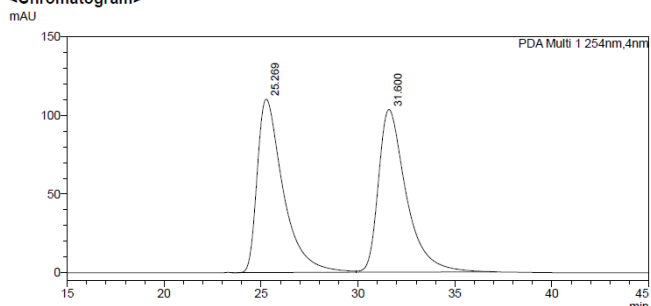

<Peak Table>

| Peak# | Ret. Time | Height | Height% | Area     | Area%   |
|-------|-----------|--------|---------|----------|---------|
| 1     | 25.269    | 110288 | 51.608  | 10273054 | 49.891  |
| 2     | 31.600    | 103416 | 48.392  | 10317749 | 50.109  |
| Total |           | 213704 | 100.000 | 20590803 | 100.000 |

<Chromatogram>

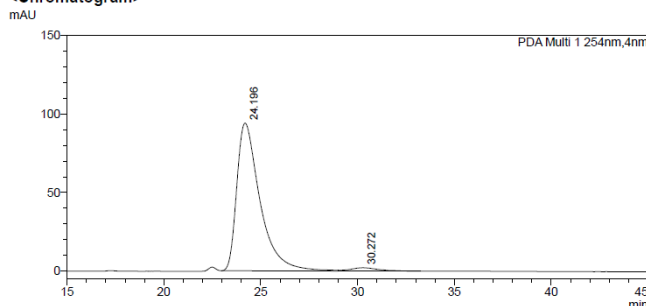

<Peak Table>

| Peak# | Ret. Time | Height | Height% | Area    | Area%   |
|-------|-----------|--------|---------|---------|---------|
| 1     | 24.196    | 94077  | 97.830  | 7851282 | 97.414  |
| 2     | 30.272    | 2086   | 2.170   | 208385  | 2.586   |
| Total |           | 96164  | 100.000 | 8059667 | 100.000 |

### (3*aR*,8*aR*)-8-(phenylsulfonyl)-3,3*a*,8,8*a*-tetrahydro-2*H*-furo[2,3-*b*]indole

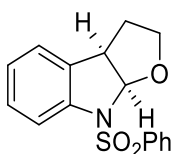

**3ra**; amorphous colorless solid (hexane/EtOAc = 8:1, 92% isolated yield); m.p. = 49-51 °C;  $[\alpha]_D^{20} = 12.061$  ( $c = 0.65$ ,  $\text{CHCl}_3$ );  $^1\text{H NMR}$  (500 MHz,  $\text{CDCl}_3$ )  $\delta$  7.99 (dd,  $J = 8.3, 1.0$  Hz, 2H), 7.55 – 7.52 (m, 1H), 7.45 (dd,  $J = 10.6, 4.8$  Hz, 2H), 7.38 (d,  $J = 8.1$  Hz, 1H), 7.19 – 7.13 (m, 2H), 6.99 (td,  $J = 7.5, 0.7$  Hz, 1H), 6.28 (d,  $J = 6.6$  Hz, 1H), 3.96 (t,  $J = 8.0$  Hz, 1H), 3.91 (t,  $J = 7.5$  Hz, 1H), 3.32 – 3.26 (m, 1H), 2.33 – 2.25 (m, 1H), 2.02 (dd,  $J = 12.2, 4.7$  Hz, 1H).  $^{13}\text{C NMR}$  (126 MHz,  $\text{CDCl}_3$ )  $\delta$  141.36, 139.50, 132.96, 131.30, 128.89, 128.36, 127.27, 124.89, 123.58, 112.71, 95.74, 66.38, 45.49, 33.63. Enantiomeric excess: 95%, determined by HPLC (Chiralpak OJ-3, hexane/*i*-PrOH = 80/20; flow rate 0.8 ml/min; 25 °C; 254 nm), first peak:  $t_R = 18.8$  min, second peak:  $t_R = 24.8$  min; HRMS (ESI)  $m/z$  calcd. for  $\text{C}_{16}\text{H}_{15}\text{NNaO}_3\text{S}$   $[\text{M}+\text{Na}]^+ = 324.0665$ , found = 324.0661; IR spectrum (neat) ( $\text{cm}^{-1}$ ) = 2884, 1362, 1169, 1080, 961, 881, 752, 592.

<Chromatogram>

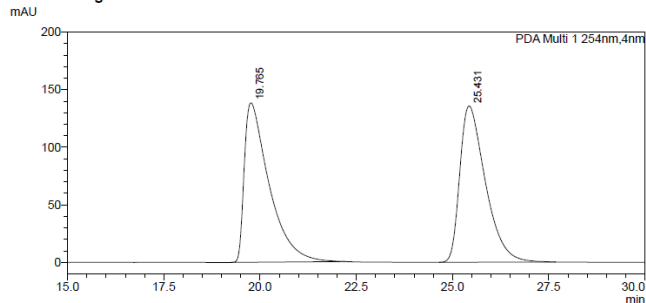

<Peak Table>

| Peak# | Ret. Time | Height | Height% | Area     | Area%   |
|-------|-----------|--------|---------|----------|---------|
| 1     | 19.765    | 138514 | 50.510  | 6210755  | 49.757  |
| 2     | 25.431    | 135716 | 49.490  | 6271410  | 50.243  |
| Total |           | 274231 | 100.000 | 12482165 | 100.000 |

<Chromatogram>

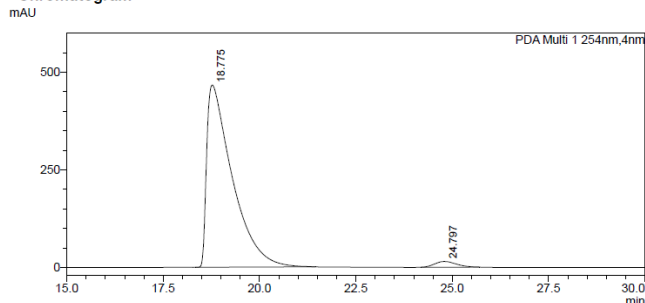

<Peak Table>

| Peak# | Ret. Time | Height | Height% | Area     | Area%   |
|-------|-----------|--------|---------|----------|---------|
| 1     | 18.775    | 466490 | 96.937  | 21535263 | 97.416  |
| 2     | 24.797    | 14742  | 3.063   | 571214   | 2.584   |
| Total |           | 481232 | 100.000 | 22106477 | 100.000 |

### (3*aS*,8*aR*)-2,3,3*a*,8*a*-tetrahydrofuro[2,3-*b*]benzofuran



## Supporting Information

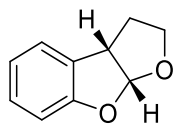

**6aa**; pale yellow oil (hexane/Et<sub>2</sub>O = 20:1, 60% isolated yield);  $[\alpha]_D^{20} = -94.038$  ( $c = 0.5$ , CH<sub>2</sub>Cl<sub>2</sub>); <sup>1</sup>H NMR (500 MHz, CDCl<sub>3</sub>)  $\delta$  7.18 (d,  $J = 7.4$  Hz, 1H), 7.14 (t,  $J = 7.7$  Hz, 1H), 6.90 (td,  $J = 7.4, 0.7$  Hz, 1H), 6.81 (d,  $J = 8.0$  Hz, 1H), 6.31 (d,  $J = 5.7$  Hz, 1H), 4.06 (t,  $J = 8.2$  Hz, 1H), 4.00 (dd,  $J = 8.3, 5.9$  Hz, 1H), 3.64 – 3.59 (m, 1H), 2.34 – 2.26 (m, 1H), 2.07 (dd,  $J = 12.2, 4.9$  Hz, 1H). <sup>13</sup>C NMR (126 MHz, CDCl<sub>3</sub>)  $\delta$  159.41, 128.66, 127.61, 124.67, 121.11, 110.85, 109.17, 67.18, 46.50, 33.54. Enantiomeric excess: 96%, determined by HPLC (Chiralpak IC, hexane/*i*-PrOH = 98/2; flow rate 1.0 ml/min; 25 °C; 210 nm), first peak:  $t_R = 10.3$  min, second peak:  $t_R = 13.0$  min; HRMS (ESI)  $m/z$  calcd. for C<sub>10</sub>H<sub>10</sub>NaO<sub>2</sub>  $[M+Na]^+ = 185.0573$ , found = 185.0589; IR spectrum (neat) (cm<sup>-1</sup>) = 2974, 1198, 1166, 1083, 961, 928, 882, 779, 733, 669.

<Chromatogram>  
mAU

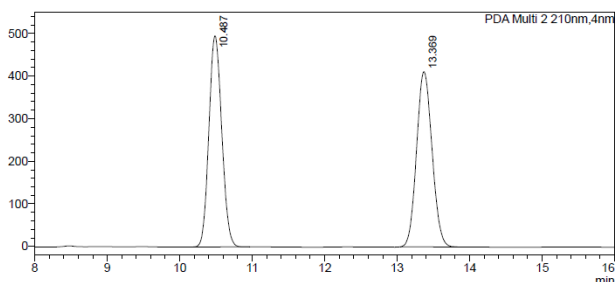

<Peak Table>

| Peak# | Ret. Time | Height | Height% | Area     | Area%   |
|-------|-----------|--------|---------|----------|---------|
| 1     | 10.487    | 496138 | 54.646  | 6114368  | 49.980  |
| 2     | 13.369    | 411779 | 45.354  | 6119199  | 50.020  |
| Total |           | 907917 | 100.000 | 12233567 | 100.000 |

<Chromatogram>  
mAU

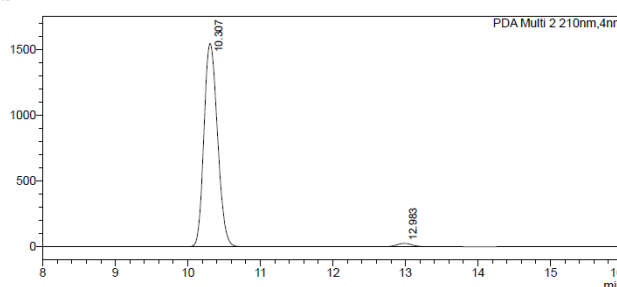

<Peak Table>

| Peak# | Ret. Time | Height  | Height% | Area     | Area%   |
|-------|-----------|---------|---------|----------|---------|
| 1     | 10.307    | 1546570 | 98.380  | 20040363 | 98.157  |
| 2     | 12.983    | 25463   | 1.620   | 376269   | 1.843   |
| Total |           | 1572032 | 100.000 | 20416631 | 100.000 |

### (3*aS*,8*aR*)-5-fluoro-2,3,3*a*,8*a*-tetrahydrofuro[2,3-*b*]benzofuran

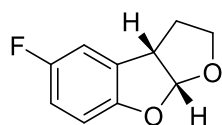

**6ba**; pale yellow oil (hexane/Et<sub>2</sub>O = 20:1, 77% isolated yield);  $[\alpha]_D^{20} = -149.872$  ( $c = 0.4$ , CH<sub>2</sub>Cl<sub>2</sub>); <sup>1</sup>H NMR (500 MHz, CDCl<sub>3</sub>)  $\delta$  6.90 – 6.88 (m, 1H), 6.83 (td,  $J = 8.9, 2.7$  Hz, 1H), 6.71 (dd,  $J = 8.7, 4.2$  Hz, 1H), 6.32 (d,  $J = 5.7$  Hz, 1H), 4.08 (t,  $J = 8.2$  Hz, 1H), 4.00 (dd,  $J = 8.2, 6.0$  Hz, 1H), 3.65 – 6.60 (m, 1H), 2.34 – 2.26 (m, 1H), 2.05 (dd,  $J = 12.3, 4.9$  Hz, 1H). <sup>13</sup>C NMR (126 MHz, CDCl<sub>3</sub>)  $\delta$  157.81 (d,  $J = 237.6$  Hz), 155.34 (d,  $J = 1.4$  Hz), 128.89 (d,  $J = 8.5$  Hz), 114.94 (d,  $J = 24.1$  Hz), 111.63 (d,  $J = 24.7$  Hz), 111.47, 109.41 (d,  $J = 8.5$  Hz), 67.21, 46.86 (d,  $J = 1.7$  Hz), 33.40. <sup>19</sup>F NMR (376 MHz, CDCl<sub>3</sub>)  $\delta$  -123.52. Enantiomeric excess: 98%, determined by HPLC (Chiralpak OD-H, hexane/*i*-PrOH = 98/2; flow rate 1.0 ml/min; 25 °C; 210 nm), first peak:  $t_R = 8.5$  min, second peak:  $t_R = 9.6$  min; HRMS (ESI)  $m/z$  calcd. for

## Supporting Information

$C_{10}H_9NaO_2$   $[M+Na]^+ = 203.0479$ , found = 203.0493; IR spectrum (neat) ( $cm^{-1}$ ) = 2986, 1447, 1234, 1190, 1165, 1126, 1097, 1072, 960, 926, 856, 799, 740, 715, 573.

<Chromatogram>

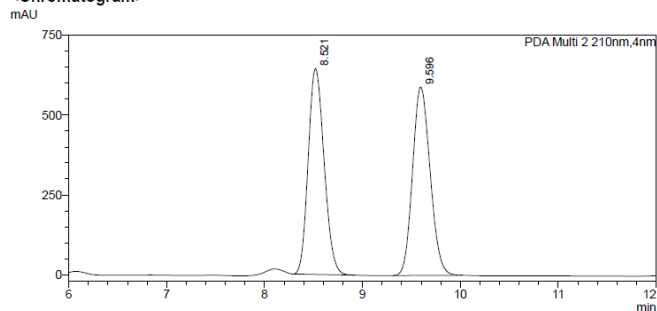

<Peak Table>

| Peak# | Ret. Time | Height  | Height% | Area     | Area%   |
|-------|-----------|---------|---------|----------|---------|
| 1     | 8.521     | 645091  | 52.258  | 7295914  | 49.702  |
| 2     | 9.596     | 589354  | 47.742  | 7383476  | 50.298  |
| Total |           | 1234446 | 100.000 | 14679390 | 100.000 |

<Chromatogram>

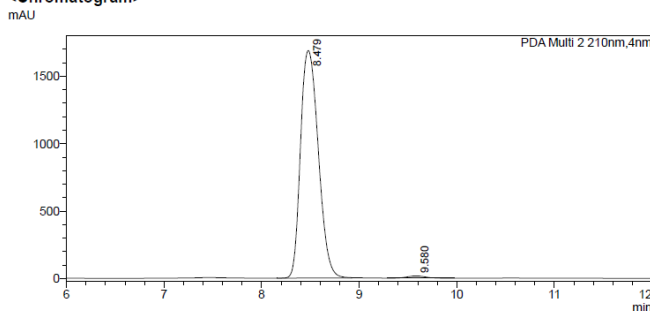

<Peak Table>

| Peak# | Ret. Time | Height  | Height% | Area     | Area%   |
|-------|-----------|---------|---------|----------|---------|
| 1     | 8.479     | 1687466 | 98.992  | 21383499 | 99.016  |
| 2     | 9.580     | 17181   | 1.008   | 212560   | 0.984   |
| Total |           | 1704647 | 100.000 | 21596059 | 100.000 |

### (3*aS*,8*aR*)-5-methyl-2,3,3*a*,8*a*-tetrahydrofuro[2,3-*b*]benzofuran

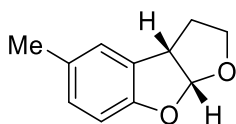

**6ca**; pale yellow oil (hexane/Et<sub>2</sub>O = 20:1, 53% isolated yield);  $[\alpha]_D^{20} = -168.117$  ( $c = 0.5$ , CH<sub>2</sub>Cl<sub>2</sub>); <sup>1</sup>H NMR (500 MHz, CDCl<sub>3</sub>)  $\delta$  6.98 (s, 1H), 6.93 (dd,  $J = 8.1, 0.6$  Hz, 1H), 6.69 (d,  $J = 8.1$  Hz, 1H), 6.27 (d,  $J = 5.7$  Hz, 1H), 4.05 (t,  $J = 8.1$  Hz, 1H), 3.95 (dd,  $J = 8.3, 5.9$  Hz, 1H), 3.63 – 3.58 (m, 1H), 2.31 – 2.23 (m, 1H), 2.28 (s, 3H), 2.06 – 2.03 (m, 1H). <sup>13</sup>C NMR (126 MHz, CDCl<sub>3</sub>)  $\delta$  157.31, 130.37, 129.01, 127.51, 125.14, 110.91, 108.65, 67.13, 46.54, 33.48, 20.73. Enantiomeric excess: 95%, determined by HPLC (Chiralpak OD-H, hexane/*i*-PrOH = 98/2; flow rate 1.0 ml/min; 25 °C; 210 nm), first peak:  $t_R = 8.0$  min, second peak:  $t_R = 8.4$  min; HRMS (ESI)  $m/z$  calcd. for  $C_{11}H_{12}NaO_2$   $[M+Na]^+ = 199.0730$ , found = 199.0732; IR spectrum (neat) ( $cm^{-1}$ ) = 2976, 1458, 1448, 1307, 1246, 1202, 1072, 1022, 957, 831, 808, 745, 654.

<Chromatogram>

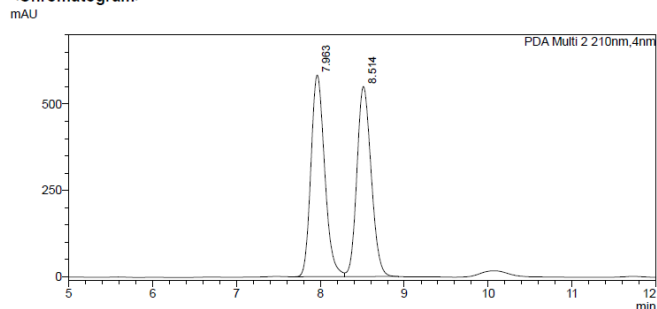

<Peak Table>

| Peak# | Ret. Time | Height  | Height% | Area     | Area%   |
|-------|-----------|---------|---------|----------|---------|
| 1     | 7.963     | 582522  | 51.435  | 6681623  | 50.642  |
| 2     | 8.514     | 550017  | 48.565  | 6512179  | 49.358  |
| Total |           | 1132538 | 100.000 | 13193802 | 100.000 |

<Chromatogram>

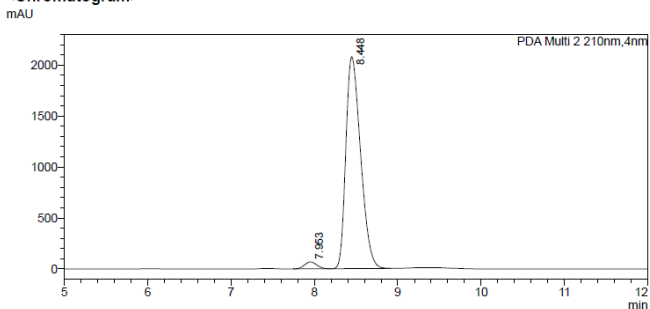

<Peak Table>

| Peak# | Ret. Time | Height  | Height% | Area     | Area%   |
|-------|-----------|---------|---------|----------|---------|
| 1     | 7.953     | 67264   | 3.131   | 695921   | 2.657   |
| 2     | 8.448     | 2080703 | 96.869  | 25494759 | 97.343  |
| Total |           | 2147966 | 100.000 | 26190679 | 100.000 |

## Supporting Information

### (3*aS*,8*aR*)-5-methyl-2,3,3*a*,8*a*-tetrahydrofuro[2,3-*b*]benzofuran

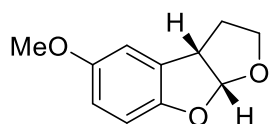

**6da**; pale yellow oil (hexane/Et<sub>2</sub>O = 10:1, 72% isolated yield);  $[\alpha]_D^{20} = -182.367$  ( $c = 0.54$ , CH<sub>2</sub>Cl<sub>2</sub>); <sup>1</sup>H NMR (500 MHz, CDCl<sub>3</sub>)  $\delta$  6.78 (d,  $J = 2.4$  Hz, 1H), 6.73 – 6.69 (m, 2H), 6.29 (d,  $J = 5.7$  Hz, 1H), 4.07 (t,  $J = 8.1$  Hz, 1H), 3.99 (dd,  $J = 8.4, 5.8$  Hz, 1H), 3.77 (s, 3H), 3.66 – 3.61 (m, 1H), 2.34 – 2.25 (m, 1H), 2.10 – 2.06 (m, 1H). <sup>13</sup>C NMR (126 MHz, CDCl<sub>3</sub>)  $\delta$  154.52, 153.44, 128.44, 113.53, 111.07, 110.70, 109.08, 67.12, 55.89, 46.96, 33.39. Enantiomeric excess: 98%, determined by HPLC (Chiralpak IC, hexane/*i*-PrOH = 98/2; flow rate 1.0 ml/min; 25 °C; 210 nm), first peak:  $t_R = 20.3$  min, second peak:  $t_R = 24.8$  min; HRMS (ESI)  $m/z$  calcd. for C<sub>11</sub>H<sub>12</sub>NaO<sub>3</sub> [M+Na]<sup>+</sup> = 215.0679, found = 215.0676; IR spectrum (neat) (cm<sup>-1</sup>) = 2980, 1240, 1198, 1076, 1068, 959, 928, 810, 739, 656.

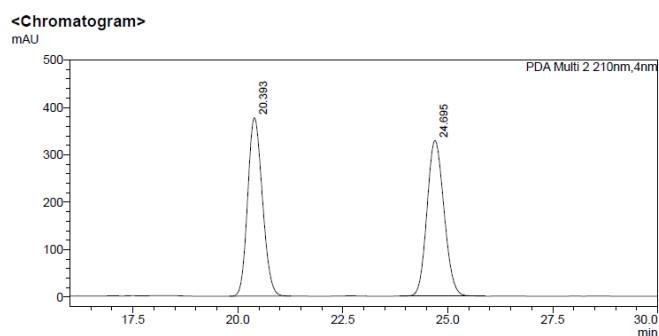

<Peak Table>  
PDA Ch2 210nm

| Peak# | Ret. Time | Height | Height% | Area     | Area%   |
|-------|-----------|--------|---------|----------|---------|
| 1     | 20.393    | 376296 | 53.411  | 9163463  | 49.760  |
| 2     | 24.695    | 328227 | 46.589  | 9251996  | 50.240  |
| Total |           | 704523 | 100.000 | 18415460 | 100.000 |

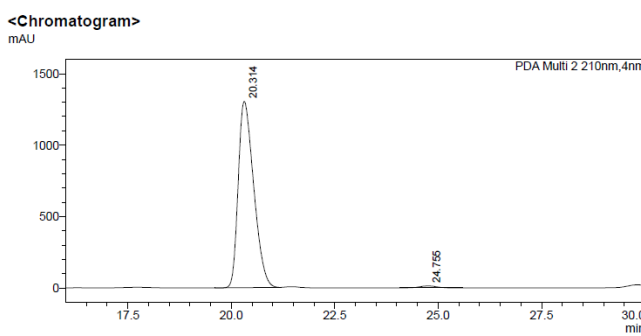

<Peak Table>  
PDA Ch2 210nm

| Peak# | Ret. Time | Height  | Height% | Area     | Area%   |
|-------|-----------|---------|---------|----------|---------|
| 1     | 20.314    | 1302541 | 98.976  | 33926047 | 98.934  |
| 2     | 24.755    | 13481   | 1.024   | 365668   | 1.066   |
| Total |           | 1316023 | 100.000 | 34291715 | 100.000 |

### (3*aS*,8*aR*)-5-methyl-2,3,3*a*,8*a*-tetrahydrofuro[2,3-*b*]benzofuran

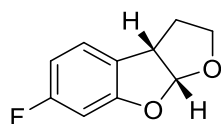

**6ea**; pale yellow oil (hexane/Et<sub>2</sub>O = 20:1, 51% isolated yield);  $[\alpha]_D^{20} = -138.84$  ( $c = 0.25$ , CH<sub>2</sub>Cl<sub>2</sub>); <sup>1</sup>H NMR (500 MHz, CDCl<sub>3</sub>)  $\delta$  7.09 (dd,  $J = 7.8, 6.1$  Hz, 1H), 6.62 – 6.58 (m, 1H), 6.52 (dd,  $J = 9.4, 2.3$  Hz, 1H), 6.34 (d,  $J = 5.7$  Hz, 1H), 4.08 (t,  $J = 8.2$  Hz, 1H), 3.97 – 3.94 (m, 1H), 3.65 – 3.60 (m, 1H), 2.32 – 2.24 (m, 1H), 2.03 (dd,  $J = 12.2, 4.8$  Hz, 1H). <sup>13</sup>C NMR (126 MHz, CDCl<sub>3</sub>)  $\delta$  163.33 (d,  $J = 244.2$  Hz), 160.45 (d,  $J = 13.1$  Hz), 124.94 (d,  $J = 10.5$  Hz), 123.28 (d,  $J = 2.6$  Hz), 112.17, 107.76 (d,  $J = 22.8$  Hz), 97.61 (d,  $J = 26.5$  Hz), 67.28, 45.88, 33.59. <sup>19</sup>F NMR (376 MHz, CDCl<sub>3</sub>)  $\delta$  -113.10. Enantiomeric excess: 90%, determined by HPLC (Chiralpak OD-H, hexane/*i*-PrOH = 98/2; flow rate 1.0 ml/min; 25 °C; 210 nm), first peak:  $t_R = 6.6$  min, second peak:  $t_R = 7.7$  min; HRMS (ESI)  $m/z$  calcd. for C<sub>10</sub>H<sub>9</sub>FN<sub>2</sub>O<sub>2</sub> [M+Na]<sup>+</sup>

## Supporting Information

= 203.0479, found = 203.0488; IR spectrum (neat) ( $\text{cm}^{-1}$ ) = 2984, 1610, 1439, 1325, 1256, 1132, 1074, 957, 918, 837, 800, 752, 610.

<Chromatogram>

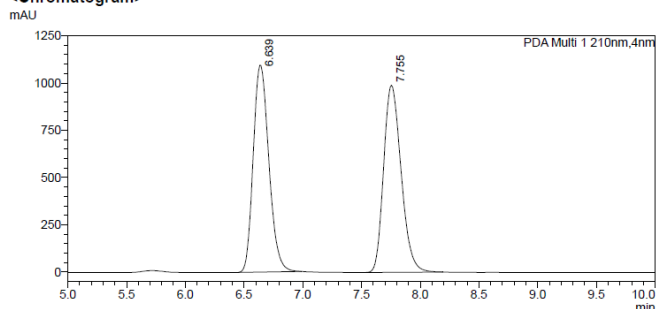

<Peak Table>

| Peak# | Ret. Time | Height  | Height% | Area     | Area%   |
|-------|-----------|---------|---------|----------|---------|
| 1     | 6.639     | 1096092 | 52.534  | 10150554 | 49.725  |
| 2     | 7.755     | 990355  | 47.466  | 10262639 | 50.275  |
| Total |           | 2086447 | 100.000 | 20413193 | 100.000 |

<Chromatogram>

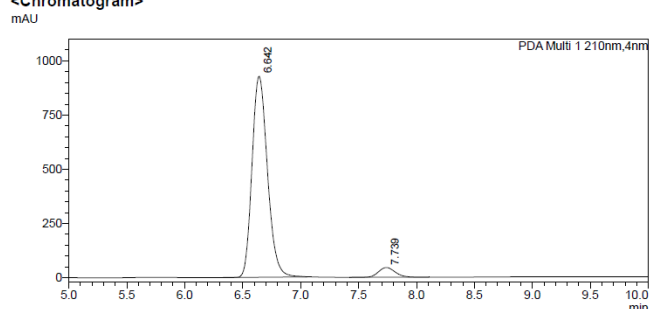

<Peak Table>

| Peak# | Ret. Time | Height | Height% | Area    | Area%   |
|-------|-----------|--------|---------|---------|---------|
| 1     | 6.642     | 927751 | 95.389  | 8590942 | 95.088  |
| 2     | 7.739     | 44849  | 4.611   | 443829  | 4.912   |
| Total |           | 972600 | 100.000 | 9034771 | 100.000 |

### (3*aS*,8*aR*)-6-methyl-2,3,3*a*,8*a*-tetrahydrofuro[2,3-*b*]benzofuran

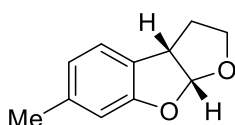

**6fa**; pale yellow oil (hexane/Et<sub>2</sub>O = 20:1, 58% isolated yield);  $[\alpha]_D^{20} = -125.319$  ( $c = 0.25$ , CH<sub>2</sub>Cl<sub>2</sub>); <sup>1</sup>H NMR (500 MHz, CDCl<sub>3</sub>)  $\delta$  7.05 (d,  $J = 7.5$  Hz, 1H), 6.72 (dd,  $J = 7.5, 0.5$  Hz, 1H), 6.63 (s, 1H), 6.29 (d,  $J = 5.7$  Hz, 1H), 4.05 (t,  $J = 8.1$  Hz, 1H), 3.95 (dd,  $J = 7.8, 6.2$  Hz, 1H), 3.63 – 3.58 (m, 1H), 2.30 (s, 3H), 2.29 – 2.22 (m, 1H), 2.03 (dd,  $J = 12.1, 4.8$  Hz, 1H). <sup>13</sup>C NMR (126 MHz, CDCl<sub>3</sub>)  $\delta$  159.63, 138.91, 124.61, 124.20, 121.83, 111.13, 109.82, 67.15, 46.24, 33.58, 21.47. Enantiomeric excess: 92%, determined by HPLC (Chiralpak IC, hexane/*i*-PrOH = 98/2; flow rate 1.0 ml/min; 25 °C; 210 nm), first peak:  $t_R = 10.2$  min, second peak:  $t_R = 13.8$  min; HRMS (ESI)  $m/z$  calcd. for C<sub>11</sub>H<sub>12</sub>NaO<sub>2</sub> [M+Na]<sup>+</sup> = 199.0730, found = 199.0725; IR spectrum (neat) ( $\text{cm}^{-1}$ ) = 2978, 1591, 1445, 1321, 1252, 1072, 943, 922, 800, 750, 627, 590.

<Chromatogram>

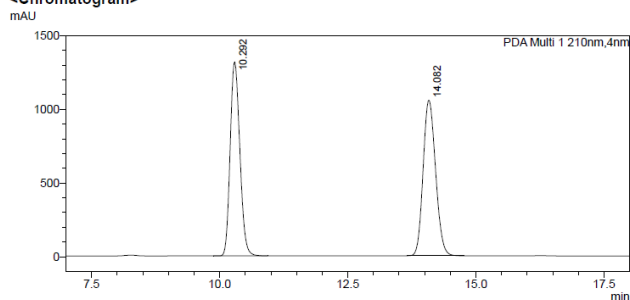

<Peak Table>

| Peak# | Ret. Time | Height  | Height% | Area     | Area%   |
|-------|-----------|---------|---------|----------|---------|
| 1     | 10.262    | 1316326 | 55.482  | 17256308 | 49.090  |
| 2     | 14.082    | 1056200 | 44.518  | 17895920 | 50.910  |
| Total |           | 2372526 | 100.000 | 35152229 | 100.000 |

<Chromatogram>

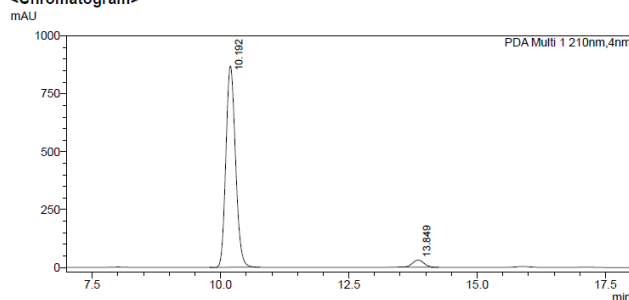

<Peak Table>

| Peak# | Ret. Time | Height | Height% | Area     | Area%   |
|-------|-----------|--------|---------|----------|---------|
| 1     | 10.192    | 870227 | 96.607  | 11367356 | 96.037  |
| 2     | 13.849    | 30567  | 3.393   | 469106   | 3.963   |
| Total |           | 900793 | 100.000 | 11836462 | 100.000 |

## Supporting Information

### (3a*S*,8a*R*)-7-fluoro-2,3,3a,8a-tetrahydrofuro[2,3-*b*]benzofuran

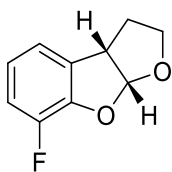

**6ga**; pale yellow oil (hexane/Et<sub>2</sub>O = 20:1, 64% isolated yield);  $[\alpha]_D^{20} = -91.870$  ( $c = 0.4$ , CH<sub>2</sub>Cl<sub>2</sub>); <sup>1</sup>H NMR (500 MHz, CDCl<sub>3</sub>)  $\delta$  6.97 – 6.91 (m, 2H), 6.85 – 6.81 (m, 1H), 6.39 (d,  $J = 5.6$  Hz, 1H), 4.10 (t,  $J = 8.2$  Hz, 1H), 4.05 (dd,  $J = 8.5, 5.7$  Hz, 1H), 3.68 – 3.63 (m, 1H), 2.35 – 2.27 (m, 1H), 2.08 (dd,  $J = 12.3, 4.9$  Hz, 1H). <sup>13</sup>C NMR (126 MHz, CDCl<sub>3</sub>)  $\delta$  146.51 (d,  $J = 246.4$  Hz), 146.04 (d,  $J = 10.5$  Hz), 131.23 (d,  $J = 3.0$  Hz), 121.61 (d,  $J = 5.6$  Hz), 119.95 (d,  $J = 3.5$  Hz), 115.75 (d,  $J = 16.9$  Hz), 112.19, 67.41, 46.95 (d,  $J = 2.0$  Hz), 33.39. <sup>19</sup>F NMR (376 MHz, CDCl<sub>3</sub>)  $\delta$  -137.96. Enantiomeric excess: 98%, determined by HPLC (Chiralpak OD-H, hexane/*i*-PrOH = 98/2; flow rate 1.0 ml/min; 25 °C; 210 nm), first peak:  $t_R = 7.7$  min, second peak:  $t_R = 9.3$  min; HRMS (ESI)  $m/z$  calcd. for C<sub>10</sub>H<sub>9</sub>FNaO<sub>2</sub> [M+Na]<sup>+</sup> = 203.0479, found = 203.0482; IR spectrum (neat) (cm<sup>-1</sup>) = 2989, 1599, 1470, 1323, 1260, 1176, 1074, 943, 924, 814, 773, 731, 696, 642.

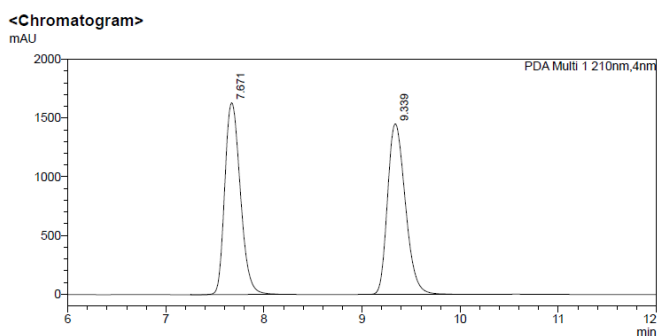

<Peak Table>  
PDA Ch1 210nm

| Peak# | Ret. Time | Height  | Height% | Area     | Area%   |
|-------|-----------|---------|---------|----------|---------|
| 1     | 7.671     | 1634252 | 52.975  | 17970548 | 49.566  |
| 2     | 9.339     | 1450724 | 47.025  | 18285398 | 50.434  |
| Total |           | 3084976 | 100.000 | 36255946 | 100.000 |

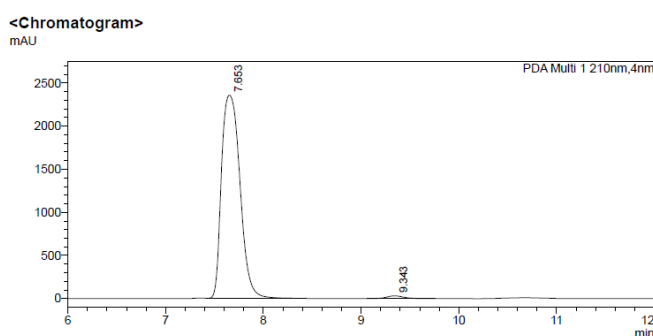

<Peak Table>  
PDA Ch1 210nm

| Peak# | Ret. Time | Height  | Height% | Area     | Area%   |
|-------|-----------|---------|---------|----------|---------|
| 1     | 7.653     | 2356338 | 98.678  | 31036614 | 98.809  |
| 2     | 9.343     | 31563   | 1.322   | 374187   | 1.191   |
| Total |           | 2387901 | 100.000 | 31410801 | 100.000 |

### (3a*S*,8a*R*)-7-methoxy-2,3,3a,8a-tetrahydrofuro[2,3-*b*]benzofuran

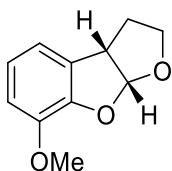

**6ha**; pale yellow oil (hexane/Et<sub>2</sub>O = 10:1, 61% isolated yield);  $[\alpha]_D^{20} = -113.542$  ( $c = 0.625$ , CH<sub>2</sub>Cl<sub>2</sub>); <sup>1</sup>H NMR (500 MHz, CDCl<sub>3</sub>)  $\delta$  6.88 – 6.85 (m, 1H), 6.81 – 6.80 (m, 1H), 6.76 (d,  $J = 8.0$  Hz, 1H), 6.35 (d,  $J = 5.7$  Hz, 1H), 4.08 – 4.00 (m, 2H), 3.87 (s, 3H), 3.66 – 3.61 (m, 1H), 2.32 – 2.26 (m, 1H), 2.06 (dd,  $J = 12.2, 4.9$  Hz, 1H). <sup>13</sup>C NMR (126 MHz, CDCl<sub>3</sub>)  $\delta$  147.71, 143.64, 128.63, 121.66, 116.61, 111.63, 111.35, 67.19, 55.88, 47.01, 33.28. Enantiomeric excess: 99%, determined by HPLC (Chiralpak OD-H,

## Supporting Information

hexane/*i*-PrOH = 98/2; flow rate 1.0 ml/min; 25 °C; 220 nm), first peak:  $t_R = 20.8$  min, second peak:  $t_R = 30.0$  min; HRMS (ESI)  $m/z$  calcd. for  $C_{11}H_{12}NaO_3$   $[M+Na]^+ = 215.0679$ , found = 215.0680; IR spectrum (neat) ( $cm^{-1}$ ) = 2982, 1618, 1593, 1460, 1302, 1271, 1198, 1060, 939, 771, 731, 648.

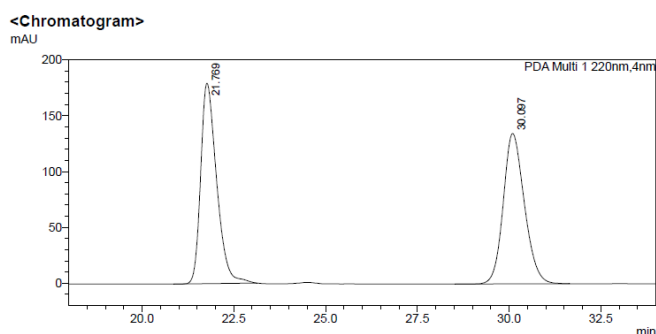

<Peak Table>  
PDA Ch1 220nm

| Peak# | Ret. Time | Height | Height% | Area     | Area%   |
|-------|-----------|--------|---------|----------|---------|
| 1     | 21.769    | 179503 | 57.141  | 5428123  | 50.194  |
| 2     | 30.097    | 134638 | 42.859  | 5386096  | 49.806  |
| Total |           | 314141 | 100.000 | 10814219 | 100.000 |

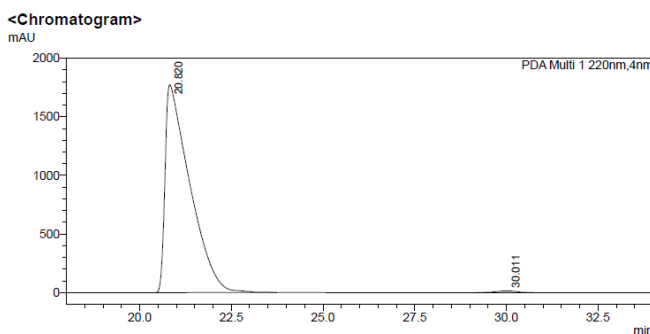

<Peak Table>  
PDA Ch1 220nm

| Peak# | Ret. Time | Height  | Height% | Area     | Area%   |
|-------|-----------|---------|---------|----------|---------|
| 1     | 20.820    | 1774718 | 99.153  | 83111894 | 99.259  |
| 2     | 30.011    | 15157   | 0.847   | 620850   | 0.741   |
| Total |           | 1789875 | 100.000 | 83732744 | 100.000 |

### (2*R*,3*aR*,8*aR*)-2-(*p*-tolyl)-8-tosyl-3,3*a*,8,8*a*-tetrahydro-2*H*-furo[2,3-*b*]indole

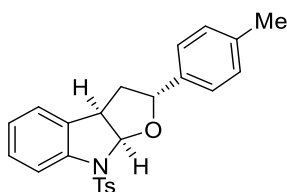

**3ab**; colorless solid (hexane/EtOAc = 7:1, 52% isolated yield); m.p. = 161-163 °C;  $[\alpha]_D^{20} = 13.927$  ( $c = 0.55$ ,  $CH_2Cl_2$ );  $^1H$  NMR (500 MHz,  $CDCl_3$ )  $\delta$  7.89 (d,  $J = 8.3$  Hz, 2H), 7.40 (d,  $J = 8.1$  Hz, 1H), 7.21 – 7.15 (m, 4H), 7.12 (s, 4H), 7.01 (td,  $J = 7.5, 0.7$  Hz, 1H), 6.49 (d,  $J = 6.6$  Hz, 1H), 4.42 (dd,  $J = 11.2, 4.4$  Hz, 1H), 4.04 (t,  $J = 7.4$  Hz, 1H), 2.33 (s, 3H), 2.33 (s, 3H), 2.30 (d,  $J = 4.5$  Hz, 1H), 2.24 – 2.18 (m, 1H).  $^{13}C$  NMR (126 MHz,  $CDCl_3$ )  $\delta$  143.73, 141.62, 137.59, 136.65, 136.17, 131.44, 129.43, 128.93, 128.41, 127.52, 126.11, 124.85, 123.42, 112.64, 95.46, 79.18, 46.24, 42.13, 21.42, 21.09. Enantiomeric excess: 85%, determined by HPLC (Chiralpak AD-H, hexane/*i*-PrOH = 70/30; flow rate 0.8 ml/min; 25 °C; 254 nm), first peak:  $t_R = 11.4$  min, second peak:  $t_R = 14.7$  min; HRMS (ESI)  $m/z$  calcd. for  $C_{24}H_{23}NNaO_3S$   $[M+Na]^+ = 428.1291$ , found = 428.1302; IR spectrum (neat) ( $cm^{-1}$ ) = 2884, 1614, 1447, 1354, 1252, 1167, 1074, 961, 928, 814, 768, 733, 664.

## Supporting Information

<Chromatogram>

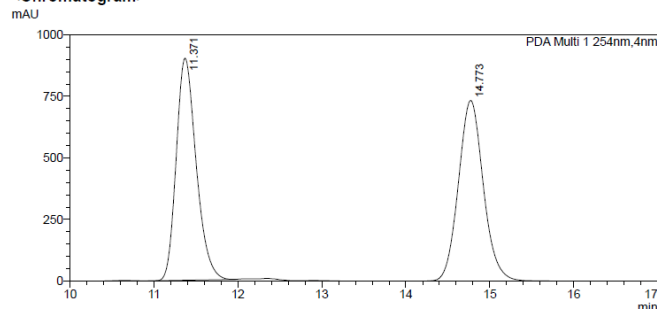

<Peak Table>

| Peak# | Ret. Time | Height  | Height% | Area     | Area%   |
|-------|-----------|---------|---------|----------|---------|
| 1     | 11.371    | 902520  | 55.168  | 14910639 | 49.724  |
| 2     | 14.773    | 733425  | 44.832  | 15076105 | 50.276  |
| Total |           | 1635946 | 100.000 | 29986744 | 100.000 |

<Chromatogram>

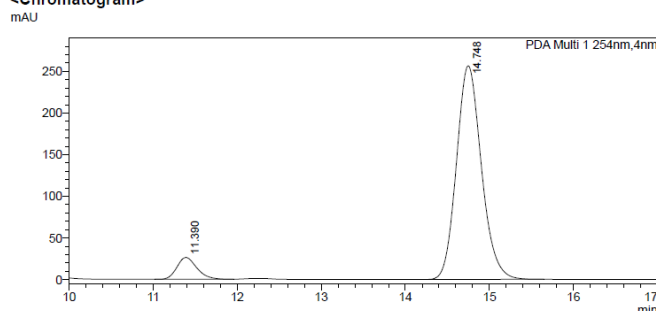

<Peak Table>

| Peak# | Ret. Time | Height | Height% | Area    | Area%   |
|-------|-----------|--------|---------|---------|---------|
| 1     | 11.390    | 26228  | 9.284   | 431140  | 7.545   |
| 2     | 14.748    | 256296 | 90.716  | 5282751 | 92.455  |
| Total |           | 282524 | 100.000 | 5713892 | 100.000 |

### methyl 4-((2*R*,3*aR*,8*aR*)-8-tosyl-3,3*a*,8,8*a*-tetrahydro-2*H*-furo[2,3-*b*]indol-2-yl)benzoate

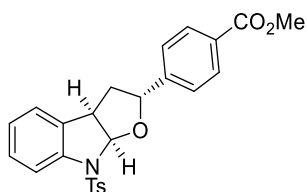

**3ac**; colorless solid (hexane/EtOAc = 4:1, 48% isolated yield); m.p. = 166-168 °C;  $[\alpha]_D^{20} = 5.673$  ( $c = 0.55$ , CH<sub>2</sub>Cl<sub>2</sub>); <sup>1</sup>H NMR (500 MHz, CDCl<sub>3</sub>) δ 7.99 (d,  $J = 8.3$  Hz, 2H), 7.87 (d,  $J = 8.3$  Hz, 2H), 7.43 (d,  $J = 8.1$  Hz, 1H), 7.33 (d,  $J = 8.2$  Hz, 2H), 7.22 (t,  $J = 7.8$  Hz, 1H), 7.17 (t,  $J = 6.8$  Hz, 3H), 7.03 (dd,  $J = 7.5, 7.0$  Hz, 1H), 6.51 (d,  $J = 6.6$  Hz, 1H), 4.50 (dd,  $J = 11.3, 4.4$  Hz, 1H), 4.07 (t,  $J = 7.4$  Hz, 1H), 3.91 (s, 3H), 2.40 (dd,  $J = 12.3, 4.5$  Hz, 1H), 2.32 (s, 3H), 2.21 – 2.15 (m, 1H). <sup>13</sup>C NMR (126 MHz, CDCl<sub>3</sub>) δ 166.74, 144.63, 143.89, 141.56, 136.49, 131.08, 129.58, 129.45, 128.59, 127.41, 125.81, 124.86, 123.61, 112.83, 95.57, 78.69, 52.03, 46.25, 42.22, 21.40. Enantiomeric excess: 90%, determined by HPLC (Chiralpak OJ-H, hexane/*i*-PrOH = 70/30; flow rate 0.8 ml/min; 25 °C; 254 nm), first peak:  $t_R = 38.0$  min, second peak:  $t_R = 52.3$  min; HRMS (ESI)  $m/z$  calcd. for C<sub>25</sub>H<sub>23</sub>NNaO<sub>5</sub>S [M+Na]<sup>+</sup> = 472.1189, found = 472.1199; IR spectrum (neat) (cm<sup>-1</sup>) = 2884, 1612, 1277, 1250, 1198, 1082, 1067, 959, 930, 815, 733, 665.

## Supporting Information

<Chromatogram>

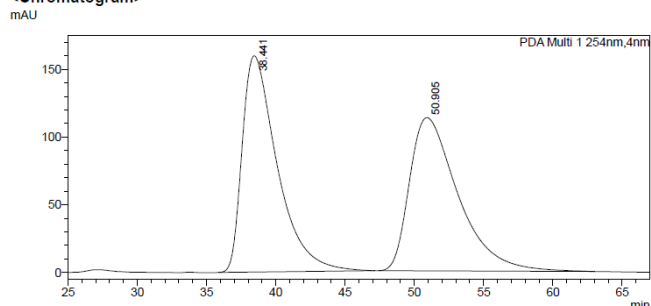

<Peak Table>

| Peak# | Ret. Time | Height | Height% | Area     | Area%   |
|-------|-----------|--------|---------|----------|---------|
| 1     | 38.441    | 159652 | 58.528  | 28106010 | 50.432  |
| 2     | 50.905    | 113125 | 41.472  | 27624527 | 49.568  |
| Total |           | 272777 | 100.000 | 55730537 | 100.000 |

<Chromatogram>

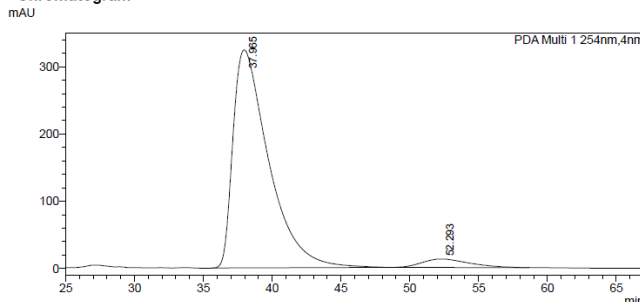

<Peak Table>

| Peak# | Ret. Time | Height | Height% | Area     | Area%   |
|-------|-----------|--------|---------|----------|---------|
| 1     | 37.965    | 324275 | 96.307  | 58554747 | 95.248  |
| 2     | 52.293    | 12434  | 3.693   | 2921649  | 4.752   |
| Total |           | 336709 | 100.000 | 61476396 | 100.000 |

### (2*R*,3*aR*,8*aR*)-2-(benzofuran-5-yl)-8-tosyl-3,3*a*,8,8*a*-tetrahydro-2*H*-furo[2,3-*b*]indole

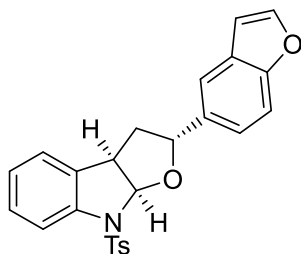

**3ad**; pale yellow solid (hexane/EtOAc = 7:1, 87% isolated yield); m.p. = 59-60 °C;  $[\alpha]_D^{20} = 12.613$  ( $c = 0.463$ ,  $\text{CH}_2\text{Cl}_2$ );  $^1\text{H NMR}$  (500 MHz,  $\text{CDCl}_3$ )  $\delta$  7.89 (d,  $J = 8.3$  Hz, 2H), 7.60 (d,  $J = 2.2$  Hz, 1H), 7.49 (d,  $J = 1.5$  Hz, 1H), 7.43 – 7.41 (m, 2H), 7.21 – 7.13 (m, 5H), 7.06 – 7.01 (m, 1H), 6.72 (dd,  $J = 2.1, 0.8$  Hz, 1H), 6.53 (d,  $J = 6.6$  Hz, 1H), 4.55 (dd,  $J = 11.2, 4.4$  Hz, 1H), 4.07 (t,  $J = 7.4$  Hz, 1H), 2.37 (dd,  $J = 12.4, 4.5$  Hz, 1H), 2.32 (s, 3H), 2.29 – 2.22 (m, 1H).  $^{13}\text{C NMR}$  (126 MHz,  $\text{CDCl}_3$ )  $\delta$  154.57, 145.41, 143.76, 141.64, 136.63, 133.77, 131.44, 129.44, 128.45, 127.49, 124.88, 123.48, 122.58, 121.52, 118.88, 112.70, 111.07, 106.51, 95.47, 79.48, 46.29, 42.61, 21.40. Enantiomeric excess: 86%, determined by HPLC (Chiralpak OJ-H, hexane/*i*-PrOH = 70/30; flow rate 0.8 ml/min; 25 °C; 254 nm), first peak:  $t_R = 16.5$  min, second peak:  $t_R = 23.9$  min; HRMS (ESI)  $m/z$  calcd. for  $\text{C}_{25}\text{H}_{21}\text{NNaO}_4\text{S}$   $[\text{M}+\text{Na}]^+ = 454.1083$ , found = 454.1087; IR spectrum (neat) ( $\text{cm}^{-1}$ ) = 2884, 1481, 1352, 1167, 1092, 1074, 1005, 961, 949, 814, 743, 662.

<Chromatogram>

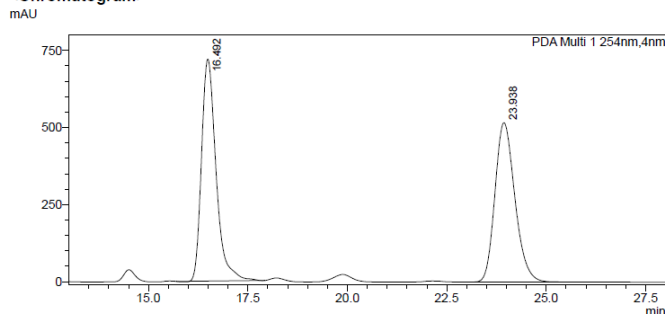

<Peak Table>

| Peak# | Ret. Time | Height  | Height% | Area     | Area%   |
|-------|-----------|---------|---------|----------|---------|
| 1     | 16.492    | 719981  | 58.210  | 18302204 | 50.378  |
| 2     | 23.938    | 516892  | 41.790  | 18027435 | 49.622  |
| Total |           | 1236874 | 100.000 | 36329639 | 100.000 |

<Chromatogram>

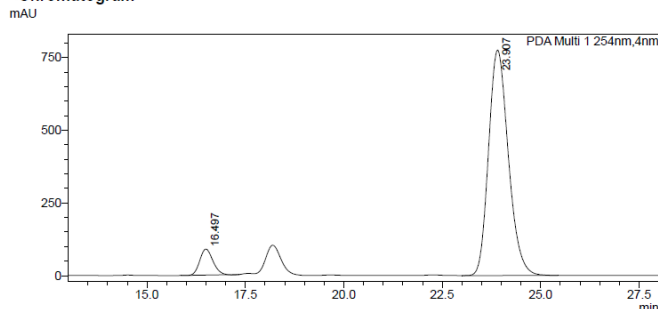

<Peak Table>

| Peak# | Ret. Time | Height | Height% | Area     | Area%   |
|-------|-----------|--------|---------|----------|---------|
| 1     | 16.497    | 89702  | 10.371  | 2079435  | 7.120   |
| 2     | 23.907    | 775251 | 89.629  | 27126303 | 92.880  |
| Total |           | 864953 | 100.000 | 29205738 | 100.000 |



## Supporting Information

### (2*R*,3*aS*,8*aR*)-2-(*p*-tolyl)-2,3,3*a*,8*a*-tetrahydrofuro[2,3-*b*]benzofuran

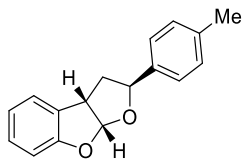

**6ab**; pale yellow oil (hexane/Et<sub>2</sub>O = 20:1, 78% isolated yield);  $[\alpha]_{\text{D}}^{20} = -54.179$  ( $c = 0.5$ , CH<sub>2</sub>Cl<sub>2</sub>); <sup>1</sup>H NMR (500 MHz, CDCl<sub>3</sub>)  $\delta$  7.23 – 7.20 (m, 3H), 7.18 (d,  $J = 7.7$  Hz, 1H), 7.13 (d,  $J = 8.0$  Hz, 2H), 6.94 (td,  $J = 7.4, 0.7$  Hz, 1H), 6.86 (d,  $J = 8.0$  Hz, 1H), 6.47 (d,  $J = 5.8$  Hz, 1H), 4.86 (dd,  $J = 11.3, 4.6$  Hz, 1H), 4.14 (dd,  $J = 8.0, 6.1$  Hz, 1H), 2.40 (dd,  $J = 12.4, 4.6$  Hz, 1H), 2.33 (s, 3H), 2.25 – 2.19 (m, 1H). <sup>13</sup>C NMR (126 MHz, CDCl<sub>3</sub>)  $\delta$  159.56, 137.60, 136.50, 129.05, 128.79, 127.82, 126.00, 124.70, 121.19, 110.51, 109.35, 80.04, 47.36, 42.09, 21.11. Enantiomeric excess: 95%, determined by HPLC (Chiralpak IF, hexane/*i*-PrOH = 95/5; flow rate 0.8 ml/min; 25 °C; 220 nm), first peak:  $t_{\text{R}} = 10.2$  min, second peak:  $t_{\text{R}} = 11.0$  min; HRMS (ESI)  $m/z$  calcd. for C<sub>17</sub>H<sub>16</sub>NaO<sub>2</sub> [M+Na]<sup>+</sup> = 275.1043, found = 275.1050; IR spectrum (neat) (cm<sup>-1</sup>) = 2982, 1597, 1477, 1460, 1323, 1246, 1223, 1180, 1098, 1072, 995, 981, 912, 889, 812, 748, 588.

<Chromatogram>  
mAU

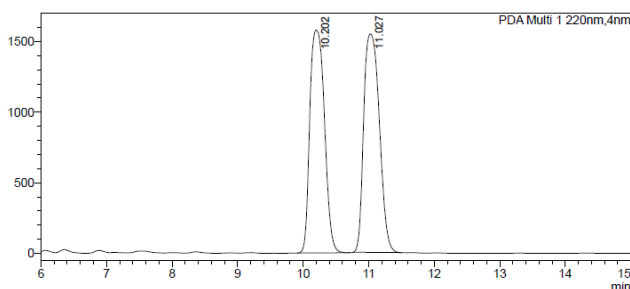

<Peak Table>

| Peak# | Ret. Time | Height  | Height% | Area     | Area%   |
|-------|-----------|---------|---------|----------|---------|
| 1     | 10.202    | 1577943 | 50.496  | 24497949 | 48.805  |
| 2     | 11.027    | 1546914 | 49.504  | 25697177 | 51.195  |
| Total |           | 3124857 | 100.000 | 50195126 | 100.000 |

<Chromatogram>  
mAU

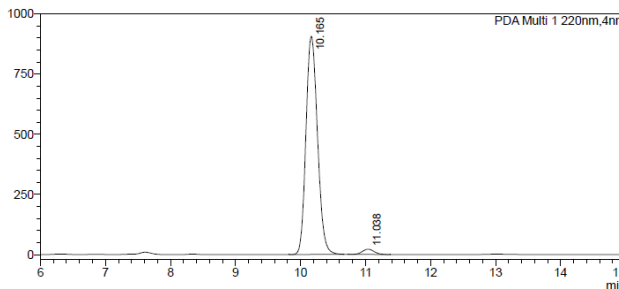

<Peak Table>

| Peak# | Ret. Time | Height | Height% | Area     | Area%   |
|-------|-----------|--------|---------|----------|---------|
| 1     | 10.165    | 907498 | 97.655  | 11181586 | 97.584  |
| 2     | 11.038    | 21789  | 2.345   | 276862   | 2.416   |
| Total |           | 929287 | 100.000 | 11458449 | 100.000 |

### methyl 4-((2*R*,3*aS*,8*aR*)-2,3,3*a*,8*a*-tetrahydrofuro[2,3-*b*]benzofuran-2-yl)benzoate

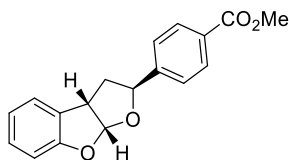

**6ac**; colorless solid (hexane/Et<sub>2</sub>O = 10:1, 45% isolated yield); m.p. = 131-132 °C;  $[\alpha]_{\text{D}}^{20} = -15.2$  ( $c = 0.35$ , CH<sub>2</sub>Cl<sub>2</sub>); <sup>1</sup>H NMR (500 MHz, CDCl<sub>3</sub>)  $\delta$  8.00 (d,  $J = 8.4$  Hz, 2H), 7.40 (d,  $J = 8.2$  Hz, 2H), 7.26 – 7.19 (m, 2H), 6.96 (td,  $J = 7.5, 0.8$  Hz, 1H), 6.87 (d,  $J = 8.0$  Hz, 1H), 6.50 (d,  $J = 5.7$  Hz, 1H), 4.93 (dd,  $J = 11.3, 4.6$  Hz, 1H), 4.18 (dd,  $J = 7.9, 6.1$  Hz, 1H), 3.90 (s, 3H), 2.48 (dd,  $J = 12.4, 4.7$  Hz, 1H), 2.22 – 2.16 (m, 1H). <sup>13</sup>C NMR (126 MHz, CDCl<sub>3</sub>)  $\delta$  166.84, 159.47, 144.97, 129.72, 129.57, 128.97, 127.41, 125.72, 124.71, 121.40, 120.52, 115.26, 110.51, 109.46, 79.56, 52.09, 47.38, 42.22. Enantiomeric excess:

## Supporting Information

81%, determined by HPLC (Chiralpak AD-H, hexane/*i*-PrOH = 95/5; flow rate 0.8 ml/min; 25 °C; 220 nm), first peak:  $t_R = 21.6$  min, second peak:  $t_R = 23.5$  min; HRMS (ESI)  $m/z$  calcd. for  $C_{18}H_{16}NaO_4$   $[M+Na]^+ = 319.0941$ , found = 319.0940; IR spectrum (neat) ( $cm^{-1}$ ) = 2974, 2884, 1381, 1275, 1198, 1086, 947, 880, 733, 623.

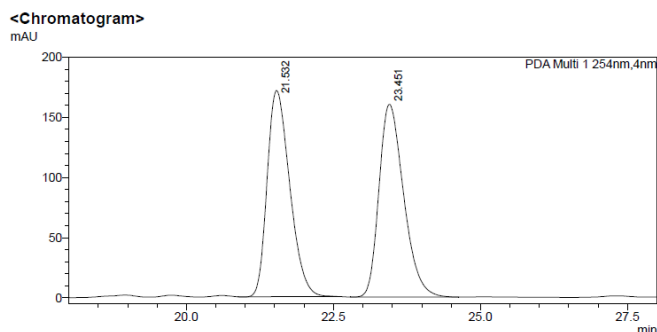

<Peak Table>

| Peak# | Ret. Time | Height | Height% | Area    | Area%   |
|-------|-----------|--------|---------|---------|---------|
| 1     | 21.532    | 171555 | 51.691  | 4588711 | 49.514  |
| 2     | 23.451    | 160333 | 48.309  | 4678727 | 50.486  |
| Total |           | 331888 | 100.000 | 9267438 | 100.000 |

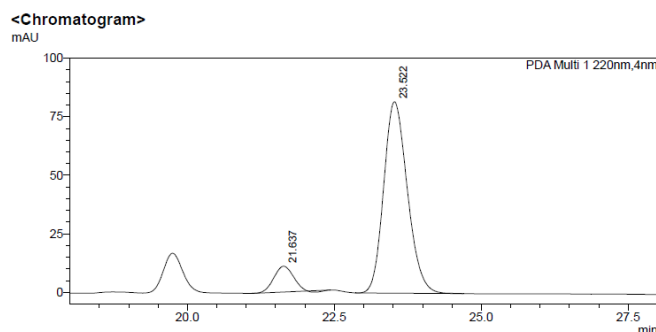

<Peak Table>

| Peak# | Ret. Time | Height | Height% | Area    | Area%   |
|-------|-----------|--------|---------|---------|---------|
| 1     | 21.637    | 10994  | 11.852  | 247571  | 9.734   |
| 2     | 23.522    | 81764  | 88.148  | 2295797 | 90.266  |
| Total |           | 92757  | 100.000 | 2543368 | 100.000 |

### (2*R*,3*aS*,8*aR*)-2-(benzofuran-5-yl)-2,3,3*a*,8*a*-tetrahydrofuro[2,3-*b*]benzofuran

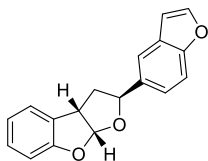

**6ad**; pale yellow oil (hexane/Et<sub>2</sub>O = 20:1, 68% isolated yield);  $[\alpha]_D^{20} = -48.694$  ( $c = 0.475$ , CH<sub>2</sub>Cl<sub>2</sub>); <sup>1</sup>H NMR (500 MHz, CDCl<sub>3</sub>)  $\delta$  7.59 (d,  $J = 2.2$  Hz, 1H), 7.56 (d,  $J = 1.4$  Hz, 1H), 7.45 (d,  $J = 8.5$  Hz, 1H), 7.26 – 7.22 (m, 2H), 7.21 – 7.18 (m, 1H), 6.95 (dd,  $J = 10.8, 4.0$  Hz, 1H), 6.88 (d,  $J = 8.0$  Hz, 1H), 6.72 – 6.71 (m, 1H), 6.50 (d,  $J = 5.8$  Hz, 1H), 4.98 (dd,  $J = 11.3, 4.6$  Hz, 1H), 4.16 (dd,  $J = 7.9, 6.2$  Hz, 1H), 2.45 (dd,  $J = 12.4, 4.6$  Hz, 1H), 2.30 – 2.24 (m, 1H). <sup>13</sup>C NMR (126 MHz, CDCl<sub>3</sub>)  $\delta$  159.57, 154.59, 145.42, 134.09, 128.81, 127.80, 127.40, 124.71, 122.46, 121.22, 118.80, 111.23, 110.49, 109.36, 106.55, 80.35, 47.40, 42.53. Enantiomeric excess: 94%, determined by HPLC (Chiralpak AD-H, hexane/*i*-PrOH = 95/5; flow rate 0.8 ml/min; 25 °C; 254 nm), first peak:  $t_R = 16.9$  min, second peak:  $t_R = 18.9$  min; HRMS (ESI)  $m/z$  calcd. for  $C_{18}H_{14}NaO_3$   $[M+Na]^+ = 301.0835$ , found = 301.0838; IR spectrum (neat) ( $cm^{-1}$ ) = 2980, 2879, 1597, 1460, 1323, 1248, 1180, 1126, 1070, 993, 889, 814, 736.

## Supporting Information

<Chromatogram>

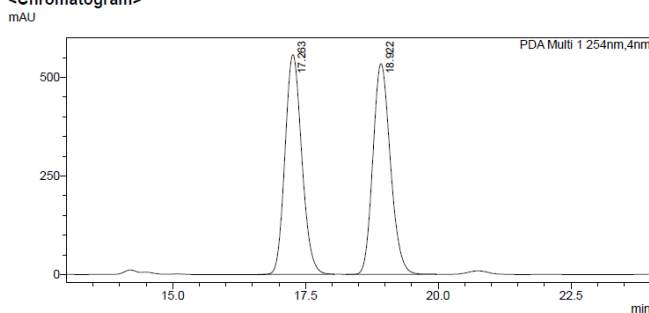

<Peak Table>

| Peak# | Ret. Time | Height  | Height% | Area     | Area%   |
|-------|-----------|---------|---------|----------|---------|
| 1     | 17.263    | 556615  | 51.030  | 12239371 | 49.976  |
| 2     | 18.922    | 534141  | 48.970  | 12251189 | 50.024  |
| Total |           | 1090756 | 100.000 | 24490560 | 100.000 |

<Chromatogram>

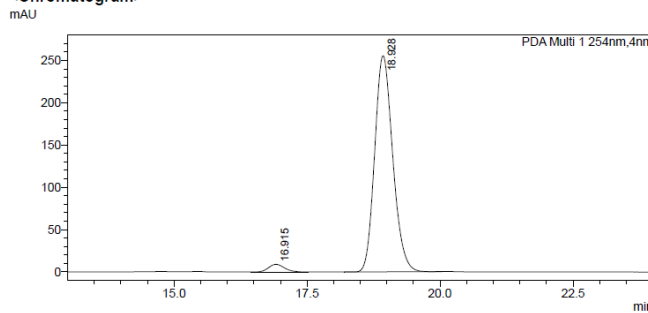

<Peak Table>

| Peak# | Ret. Time | Height | Height% | Area    | Area%   |
|-------|-----------|--------|---------|---------|---------|
| 1     | 16.915    | 9014   | 3.408   | 185627  | 2.976   |
| 2     | 18.928    | 255490 | 96.592  | 6051369 | 97.024  |
| Total |           | 264505 | 100.000 | 6236996 | 100.000 |

### 2-((2*R*,3*aS*,8*aR*)-2,3,3*a*,8*a*-tetrahydrofuro[2,3-*b*]benzofuran-2-yl)quinoline

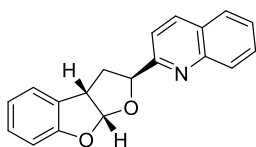

**6ae**; yellow solid (hexane/Et<sub>2</sub>O = 8:1, 53% isolated yield); m.p. = 126-128 °C;  $[\alpha]_D^{20} = -9.2$  ( $c = 0.4$ , CH<sub>2</sub>Cl<sub>2</sub>); <sup>1</sup>H NMR (500 MHz, CDCl<sub>3</sub>) δ 8.18 (d,  $J = 8.5$  Hz, 1H), 8.02 (d,  $J = 8.5$  Hz, 1H), 7.81 (d,  $J = 8.1$  Hz, 1H), 7.71 – 7.67 (m, 1H), 7.63 (d,  $J = 8.5$  Hz, 1H), 7.52 (t,  $J = 7.5$  Hz, 1H), 7.24 (d,  $J = 7.4$  Hz, 1H), 7.19 (td,  $J = 7.4, 0.6$  Hz, 1H), 6.95 (t,  $J = 7.4$  Hz, 1H), 6.88 (d,  $J = 8.1$  Hz, 1H), 6.56 (d,  $J = 5.6$  Hz, 1H), 5.16 (dd,  $J = 11.3, 4.8$  Hz, 1H), 4.20 (dd,  $J = 7.7, 6.2$  Hz, 1H), 2.69 (dd,  $J = 12.3, 4.7$  Hz, 1H), 2.44 – 2.37 (m, 1H). <sup>13</sup>C NMR (126 MHz, CDCl<sub>3</sub>) δ 159.82, 159.38, 147.33, 137.07, 129.71, 129.54, 128.89, 127.62, 127.49 (d,  $J = 41.1$  Hz), 126.44, 124.92, 121.42, 118.20, 115.43, 110.80, 109.41, 81.43, 47.32, 40.84. Enantiomeric excess: 89%, determined by HPLC (Chiralpak IF, hexane/*i*-PrOH = 95/5; flow rate 0.8 ml/min; 25 °C; 254 nm), first peak:  $t_R = 19.4$  min, second peak:  $t_R = 25.2$  min; HRMS (ESI)  $m/z$  calcd. for C<sub>19</sub>H<sub>16</sub>NO<sub>2</sub> [M+H]<sup>+</sup> = 290.1176, found = 290.1185; IR spectrum (neat) (cm<sup>-1</sup>) = 2976, 2878, 1381, 1321, 1198, 1086, 947, 880, 752, 631.

<Chromatogram>

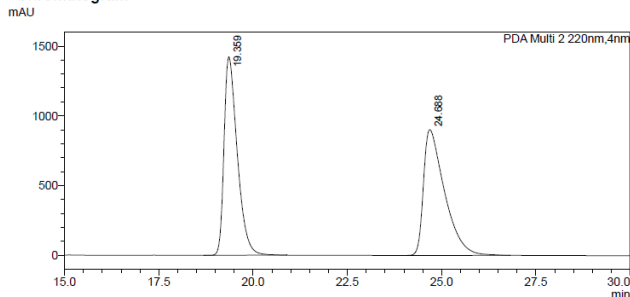

<Peak Table>

| Peak# | Ret. Time | Height  | Height% | Area     | Area%   |
|-------|-----------|---------|---------|----------|---------|
| 1     | 19.359    | 1423601 | 61.218  | 34747305 | 49.809  |
| 2     | 24.688    | 901855  | 38.782  | 35013559 | 50.191  |
| Total |           | 2325456 | 100.000 | 69760864 | 100.000 |

<Chromatogram>

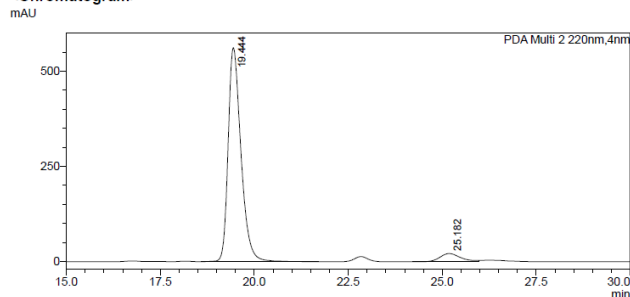

<Peak Table>

| Peak# | Ret. Time | Height | Height% | Area     | Area%   |
|-------|-----------|--------|---------|----------|---------|
| 1     | 19.444    | 561822 | 96.361  | 13316060 | 94.259  |
| 2     | 25.182    | 21215  | 3.639   | 811086   | 5.741   |
| Total |           | 583038 | 100.000 | 14127145 | 100.000 |

## Supporting Information

### (3a*S*,8a*R*)-8a-methyl-2,3,3a,8a-tetrahydrofuro[2,3-*b*]benzofuran

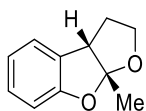

**6af**; pale yellow oil (hexane/Et<sub>2</sub>O = 20:1, 47% isolated yield);  $[\alpha]_D^{20} = -70.12$  ( $c = 0.33$ , CH<sub>2</sub>Cl<sub>2</sub>); Enantiomeric excess: 83%, determined by HPLC (Chiralpak OJ-H, hexane/*i*-PrOH = 98/2; flow rate 0.5 ml/min; 25 °C; 205 nm), first peak:  $t_R = 14.4$  min, second peak:  $t_R = 17.3$  min. (Please refer to Mazet's work for <sup>1</sup>H/<sup>13</sup>C NMR and IR)

<Chromatogram>  
mAU

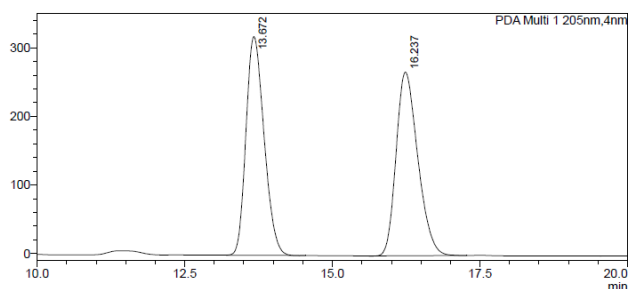

<Peak Table>

| Peak# | Ret. Time | Height | Height% | Area     | Area%   |
|-------|-----------|--------|---------|----------|---------|
| 1     | 13.672    | 318971 | 54.366  | 6804339  | 49.869  |
| 2     | 16.237    | 267739 | 45.634  | 6840208  | 50.131  |
| Total |           | 586710 | 100.000 | 13644547 | 100.000 |

<Chromatogram>  
mAU

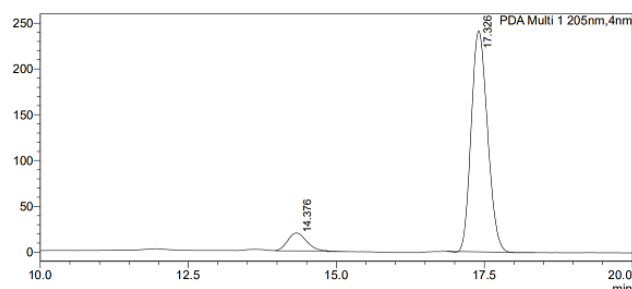

<Peak Table>

| Peak# | Ret. Time | Height | Height% | Area    | Area%   |
|-------|-----------|--------|---------|---------|---------|
| 1     | 14.376    | 19538  | 7.490   | 432982  | 8.560   |
| 2     | 17.326    | 241312 | 92.510  | 4625210 | 91.440  |
| Total |           | 260849 | 100.000 | 5058192 | 100.000 |

## Supporting Information

### 5. Absolute Configuration of 3 and 6

X-ray structure of **3aa** and **3ac**:

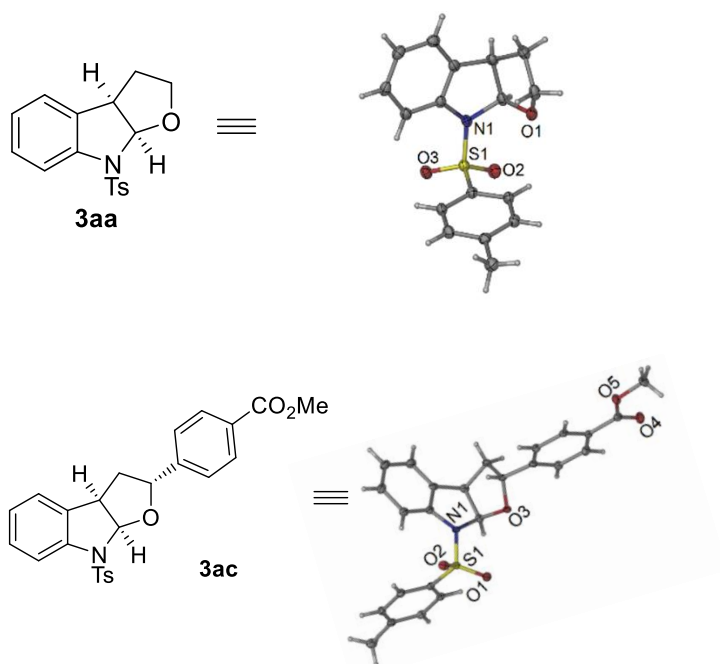

The configuration of **6aa-6ha** was determined by comparing the optical rotation with the reported ones in Mazet's work (see ref. 1).

For instance:

|                | Our work                                                                                | Mazet's work                                                                         |
|----------------|-----------------------------------------------------------------------------------------|--------------------------------------------------------------------------------------|
| <br><b>6ca</b> | $[\alpha]_{\text{D}}^{20} = -168.114$ ( $c = 0.5$ , CH <sub>2</sub> Cl <sub>2</sub> )   | $[\alpha]_{\text{D}}^{23} = -172.0$ ( $c = 0.85$ , CH <sub>2</sub> Cl <sub>2</sub> ) |
| <br><b>6da</b> | $[\alpha]_{\text{D}}^{20} = -182.367$ ( $c = 0.54$ , CH <sub>2</sub> Cl <sub>2</sub> )  | $[\alpha]_{\text{D}}^{23} = -166.8$ ( $c = 0.54$ , CH <sub>2</sub> Cl <sub>2</sub> ) |
| <br><b>6ha</b> | $[\alpha]_{\text{D}}^{20} = -113.542$ ( $c = 0.625$ , CH <sub>2</sub> Cl <sub>2</sub> ) | $[\alpha]_{\text{D}}^{23} = -108$ ( $c = 0.81$ , CH <sub>2</sub> Cl <sub>2</sub> )   |

## Supporting Information

The configuration of **6ab-6ae** was determined by comparing the optical rotation and  $^1\text{H}$ - $^1\text{H}$ -NOESY-NMR spectrum with the reported one in Mazet's work (see ref. 1).

For instance:

| Our work                                                                                        |                                                                               | Mazet's work                                                                  |                                                                                                  |
|-------------------------------------------------------------------------------------------------|-------------------------------------------------------------------------------|-------------------------------------------------------------------------------|--------------------------------------------------------------------------------------------------|
| 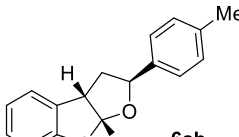<br><b>6ab</b> | $[\alpha]_{\text{D}}^{20} = -54.179$<br>( $c = 0.5, \text{CH}_2\text{Cl}_2$ ) | $[\alpha]_{\text{D}}^{23} = -136.7$<br>( $c = 0.49, \text{CH}_2\text{Cl}_2$ ) | <br><b>3n</b> |

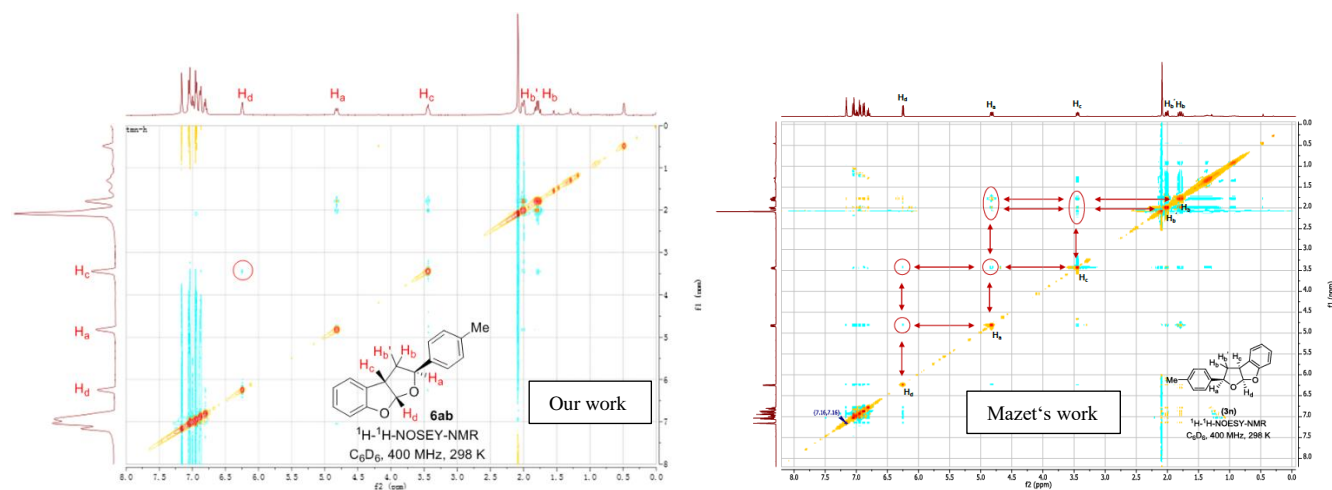

The configuration of new modified ***N*-Me-Xiang-Phos** was determined according to the reported ***N*-Me-Xu-Phos** in our previous work, due to the same one-pot synthesis approach (see ref. 3).

## Supporting Information

---

### 6. References

- 1 G. M. Borrajo-Calleja, V. Bizet, C. Mazet, *J. Am. Chem. Soc.* **2016**, *138*, 4014–4017.
- 2 Y.-Z. Chen, M.-L. Peng, D. Zhang, L.-P. Zhang, L.-Z. Wu, C.-H. Tung, *Tetrahedron*, **2006**, *62*, 10688-10693.
- 3 Z.-M. Zhang, B. Xu, Y. Qian, L. Wu, Y. Wu, L. Zhou, Y. Liu, J. Zhang, *Angew. Chem.* **2018**, *130*, 10530-10534; *Angew. Chem. Int. Ed.* **2018**, *57*, 10373-10377.

## Supporting Information

### 7. $^1\text{H}$ , $^{13}\text{C}$ , $^{19}\text{F}$ , $^{31}\text{P}$ Spectra for (*S,R*)-*N*-Me-X4/X5, 3 and 6

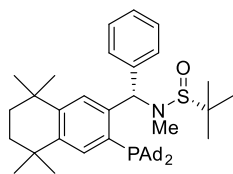

(*S,R*)-*N*-Me-X4

$^1\text{H}$  NMR (500 MHz,  $\text{CDCl}_3$ , 298 K)

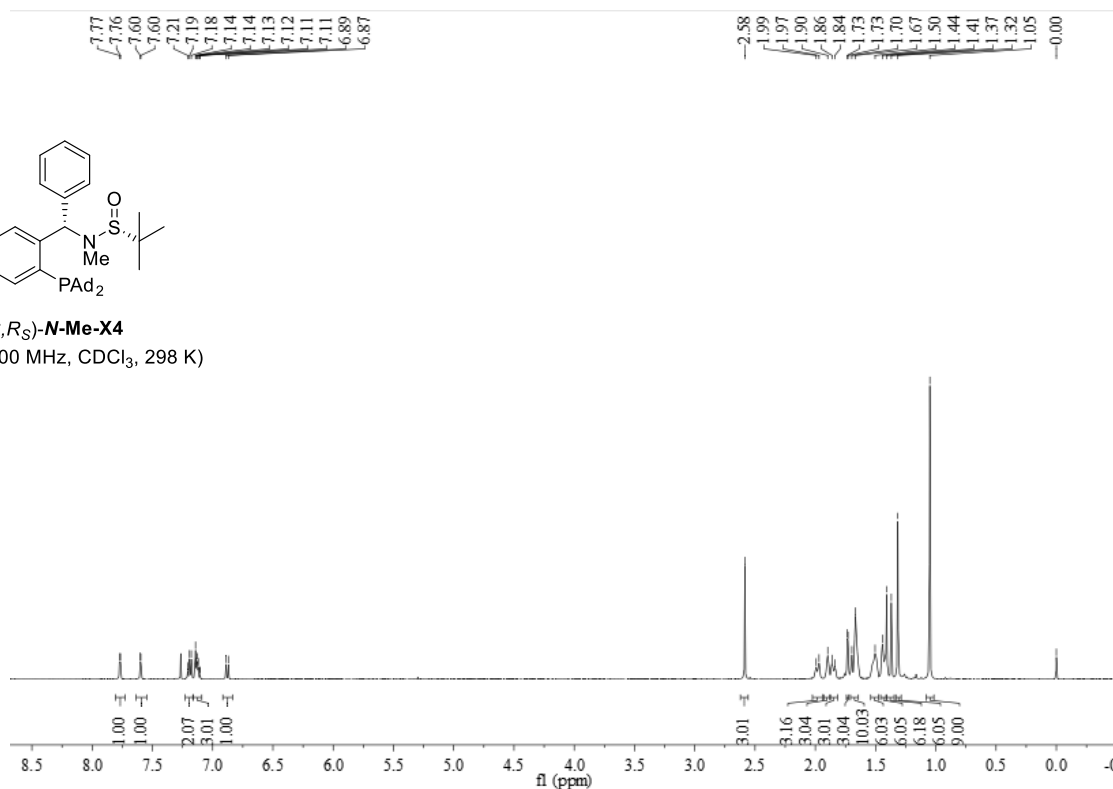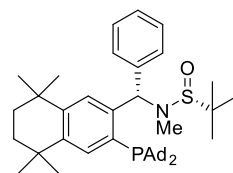

(*S,R*)-*N*-Me-X4

$^{13}\text{C}$  NMR (126 MHz,  $\text{CDCl}_3$ , 298 K)

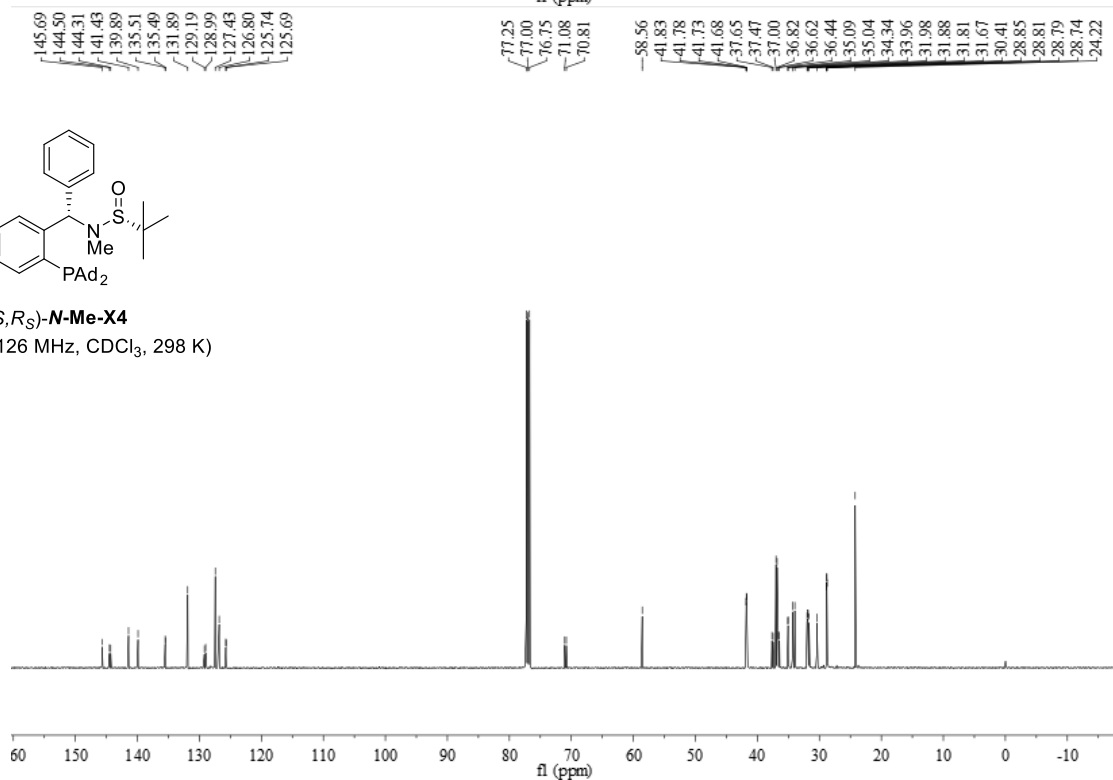



# Supporting Information

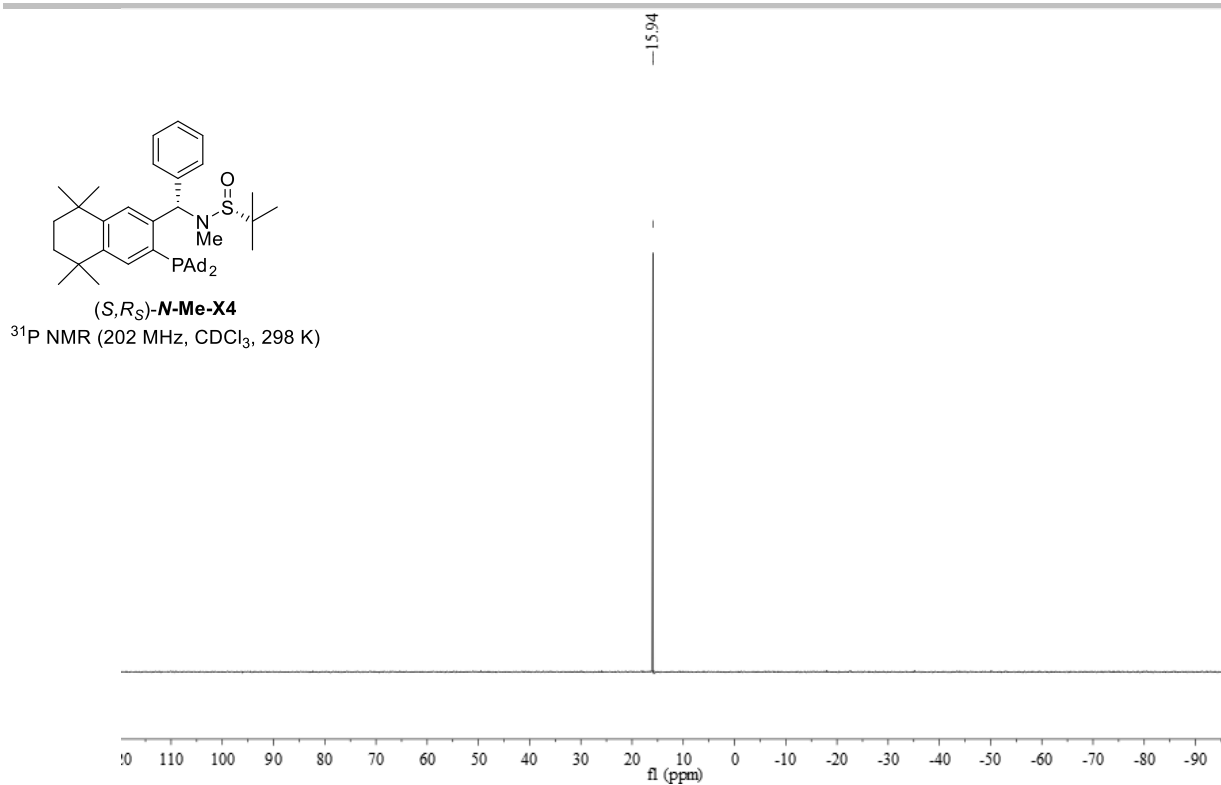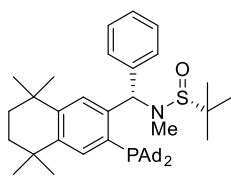

**(*S,R*<sub>3</sub>)-N-Me-X4**

<sup>31</sup>P NMR (202 MHz, CDCl<sub>3</sub>, 298 K)

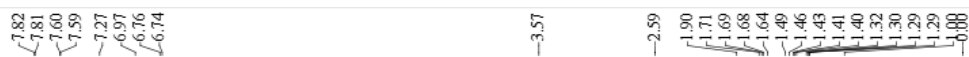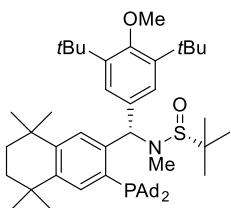

**(*S,R*<sub>3</sub>)-N-Me-X5**

<sup>1</sup>H NMR (500 MHz, CDCl<sub>3</sub>, 298 K)

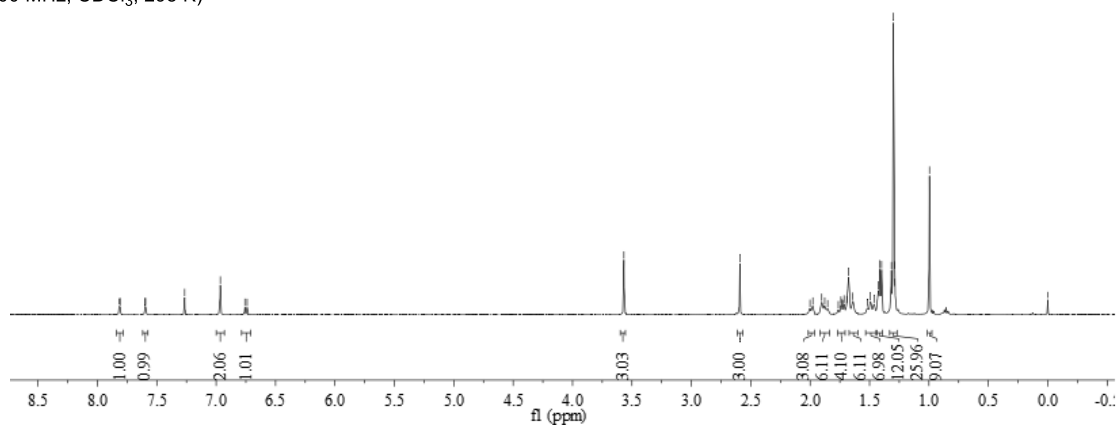

# Supporting Information

158.23  
145.62  
144.67  
144.48  
141.86  
141.19  
135.46  
133.51  
130.90  
129.22  
129.01  
125.14  
125.09

77.25  
77.00  
76.75  
71.26  
70.99  
64.23  
58.46  
41.70  
41.66  
41.60  
37.61  
37.42  
37.02  
36.85  
36.65  
36.45  
35.57  
34.41  
33.94  
32.45  
32.07  
31.62  
31.42  
30.73  
28.88  
28.82  
28.81  
28.76  
24.15

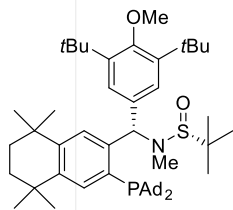

**(S,R<sub>S</sub>)-N-Me-X5**

<sup>13</sup>C NMR (126 MHz, CDCl<sub>3</sub>, 298 K)

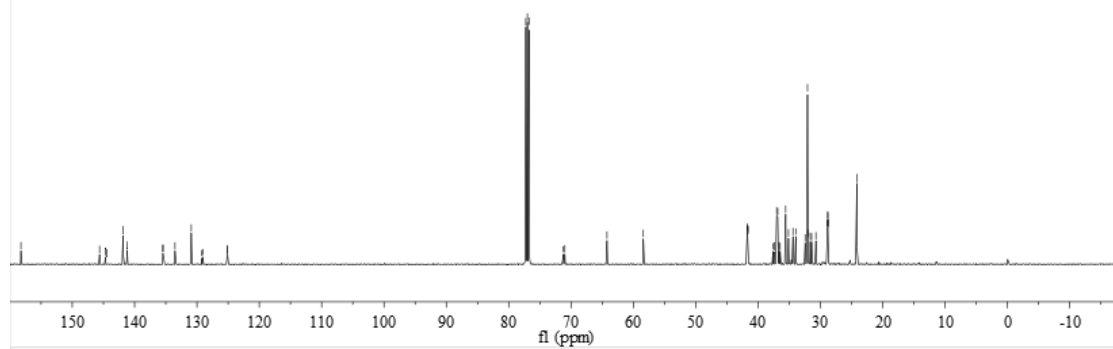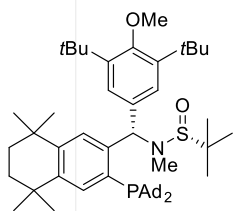

**(S,R<sub>S</sub>)-N-Me-X5**

<sup>31</sup>P NMR (202 MHz, CDCl<sub>3</sub>, 298 K)

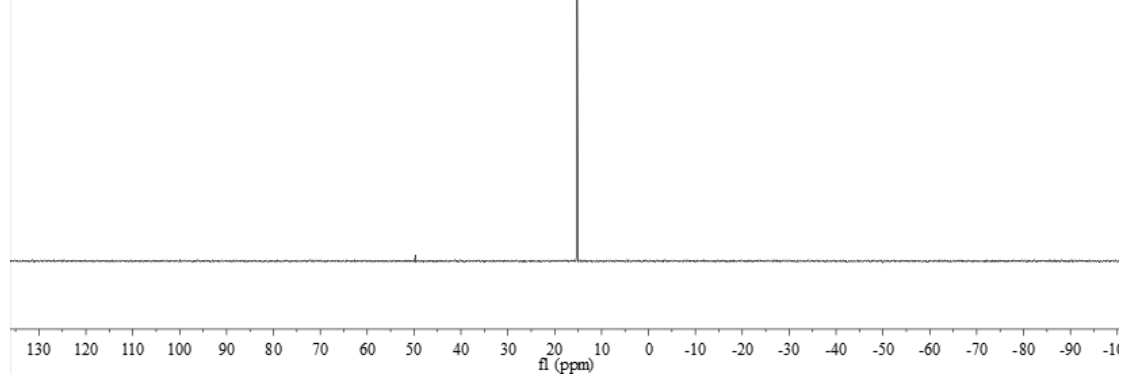

# Supporting Information

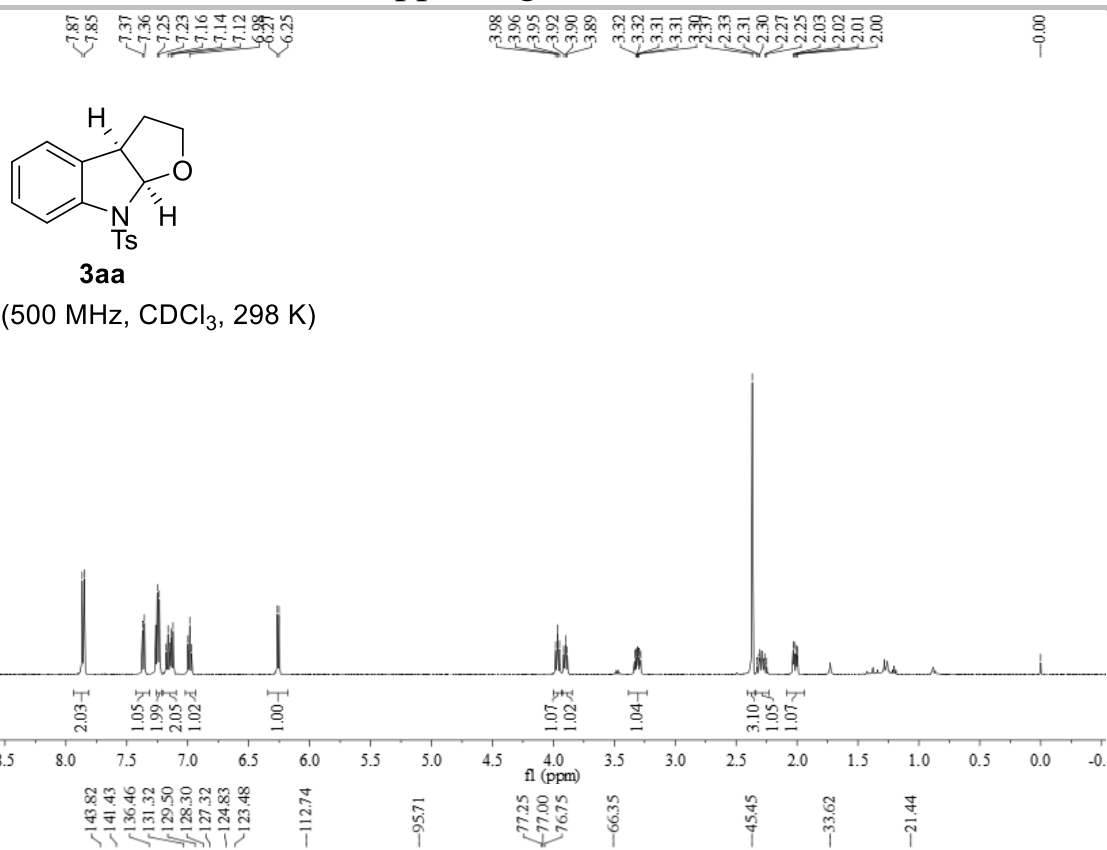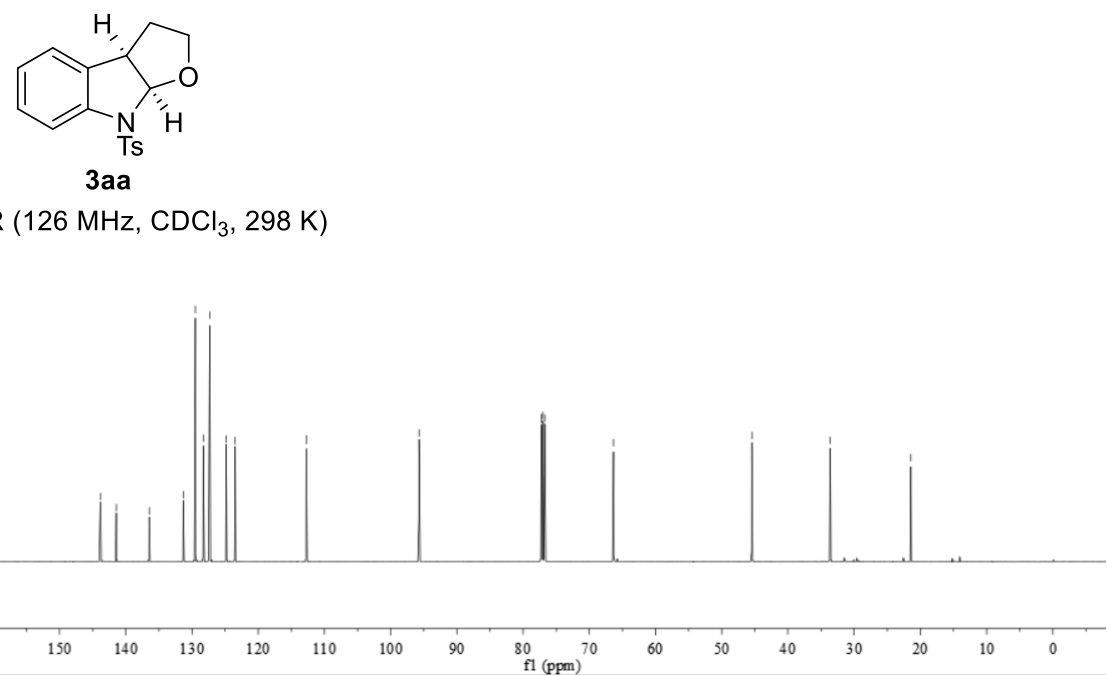

# Supporting Information

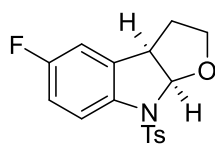

**3ba**

$^1\text{H NMR}$  (500 MHz,  $\text{CDCl}_3$ , 298 K)

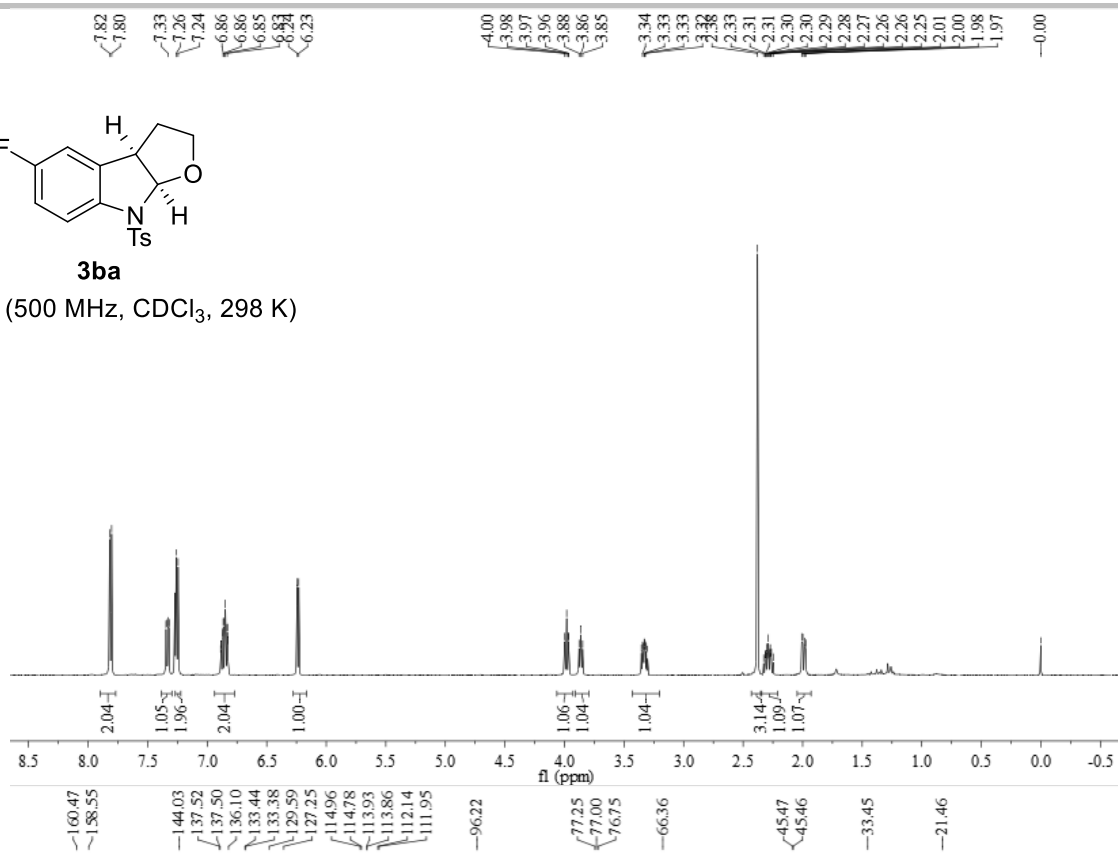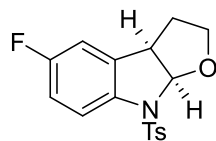

**3ba**

$^{13}\text{C NMR}$  (126 MHz,  $\text{CDCl}_3$ , 298 K)

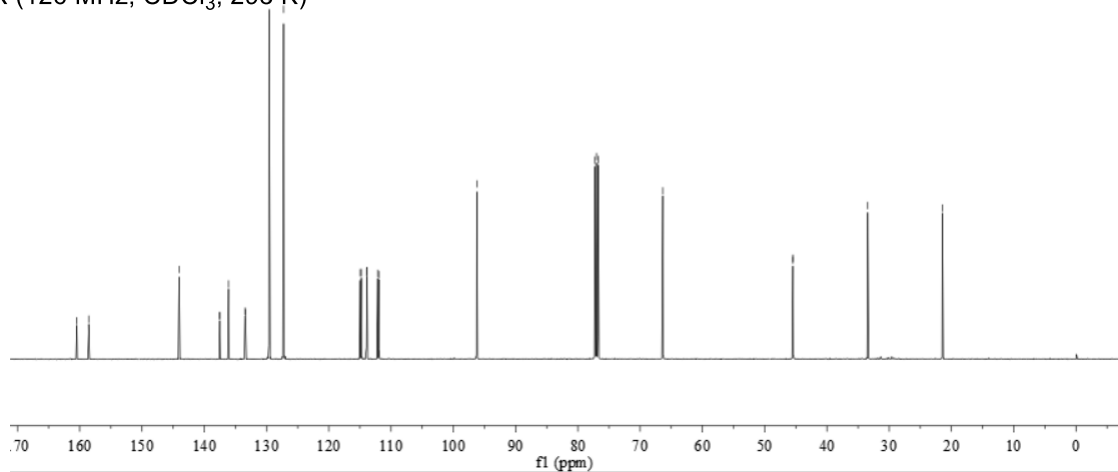

## Supporting Information

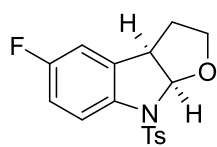

**3ba**

$^{19}\text{F}$  NMR (376 MHz,  $\text{CDCl}_3$ , 298 K)

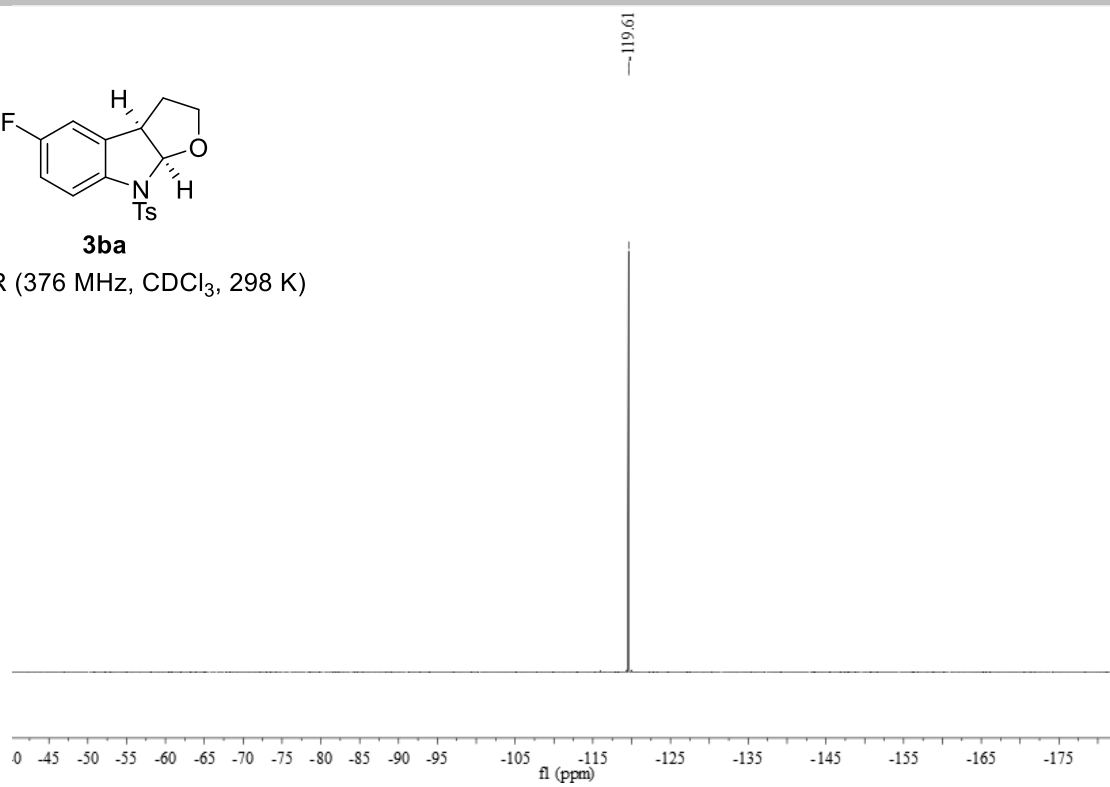

# Supporting Information

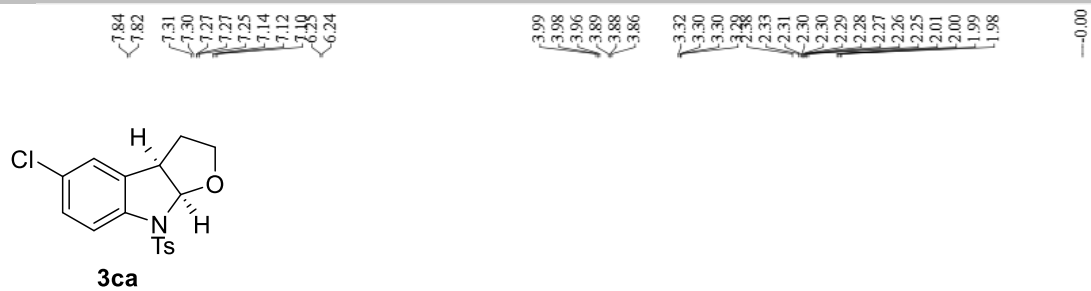

<sup>1</sup>H NMR (500 MHz, CDCl<sub>3</sub>, 298 K)

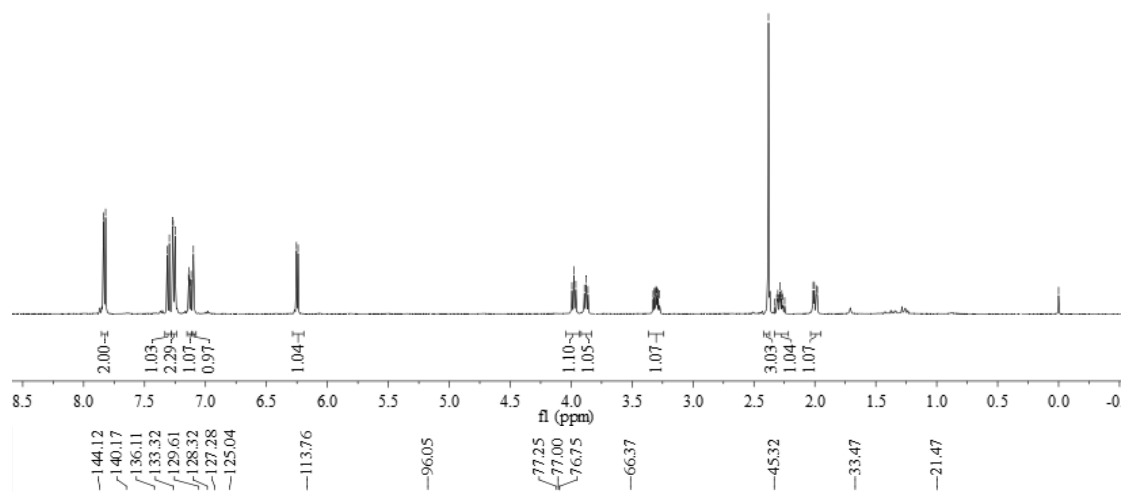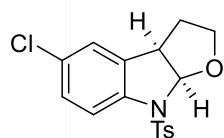

**3ca**

<sup>13</sup>C NMR (126 MHz, CDCl<sub>3</sub>, 298 K)

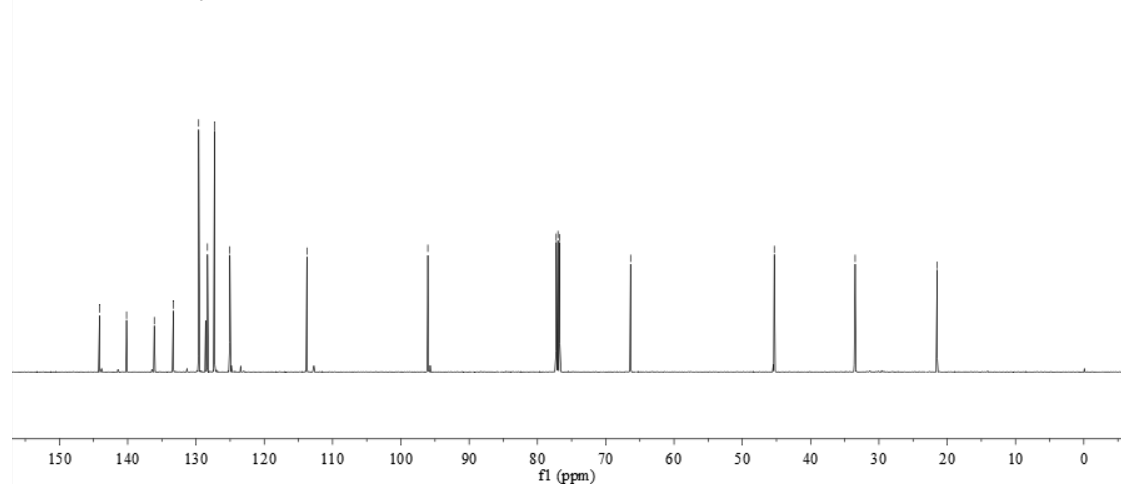

# Supporting Information

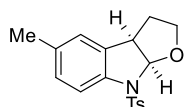

**3da**

$^1\text{H NMR}$  (500 MHz,  $\text{CDCl}_3$ , 298 K)

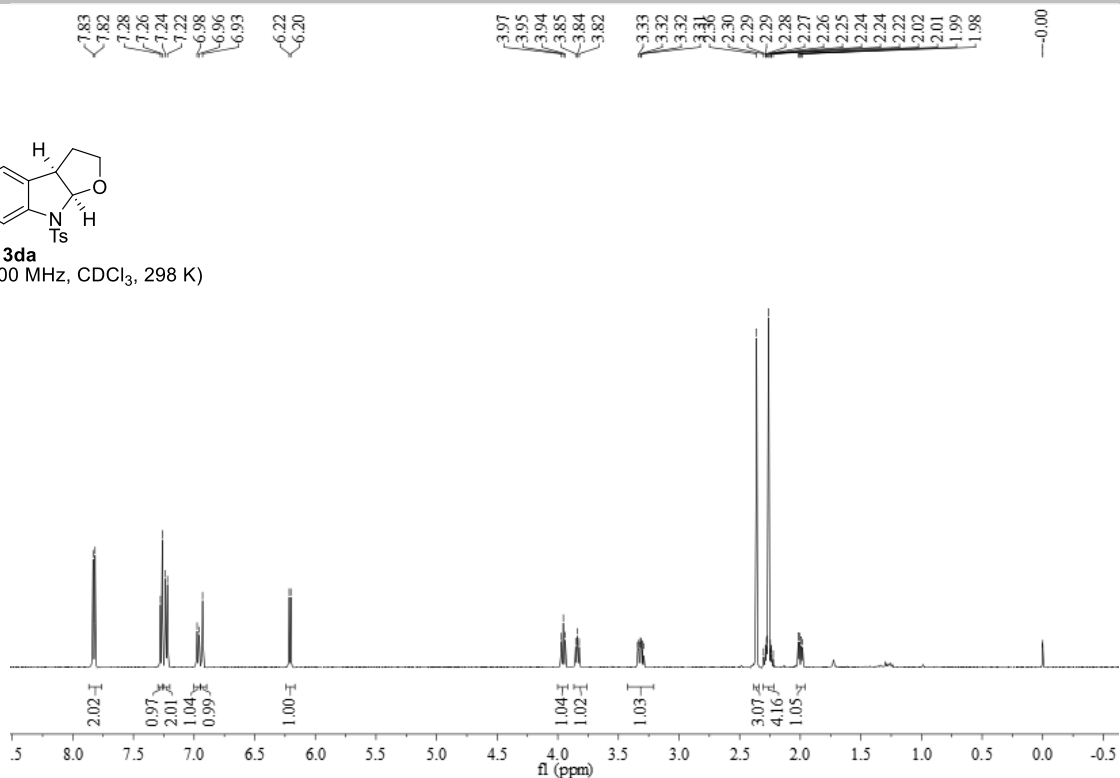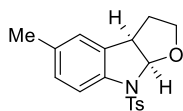

**3da**

$^{13}\text{C NMR}$  (126 MHz,  $\text{CDCl}_3$ , 298 K)

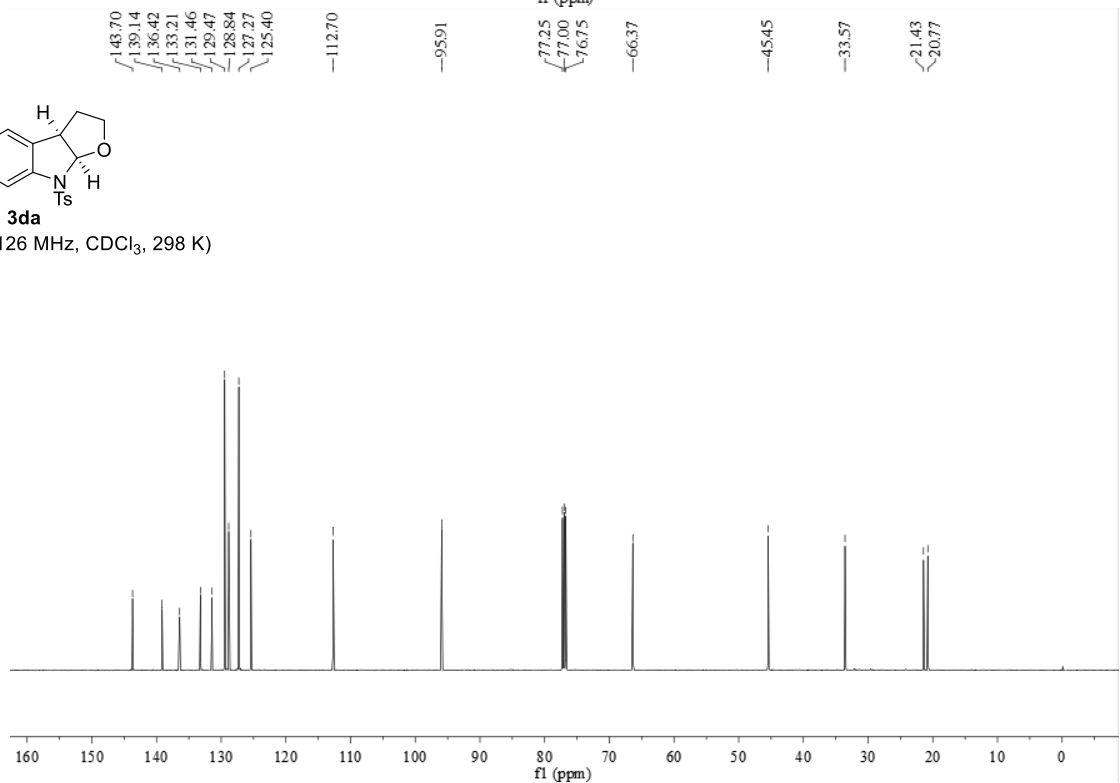

# Supporting Information

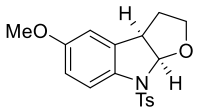

**3ea**

$^1\text{H}$  NMR (500 MHz,  $\text{CDCl}_3$ , 298 K)

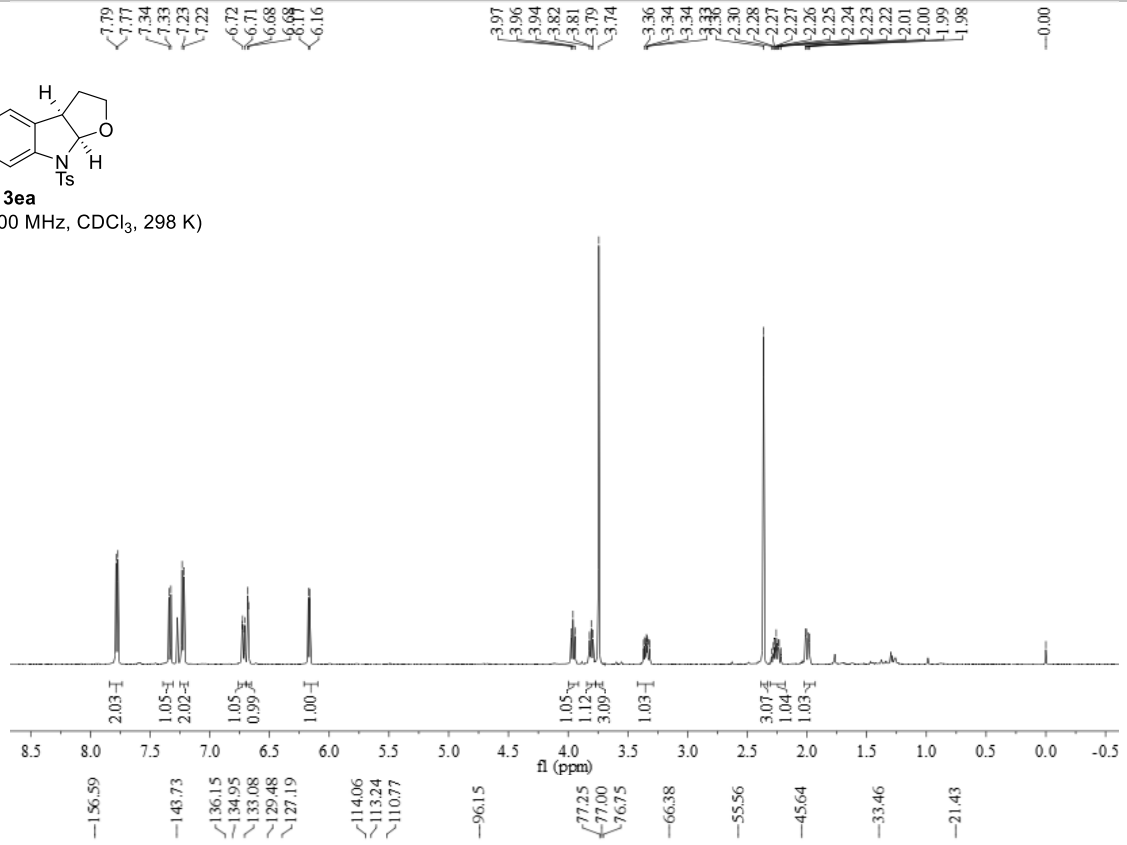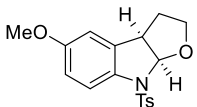

**3ea**

$^{13}\text{C}$  NMR (126 MHz,  $\text{CDCl}_3$ , 298 K)

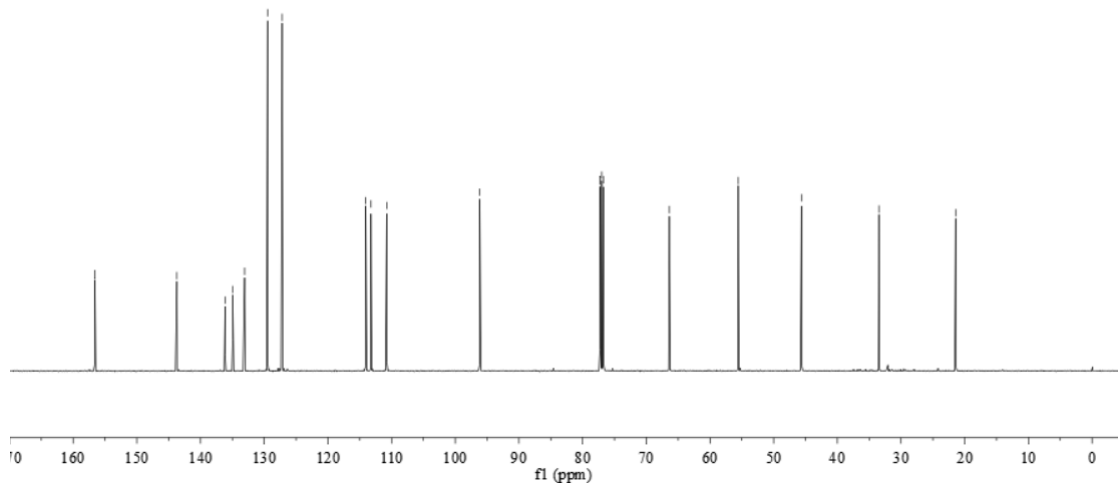



# Supporting Information

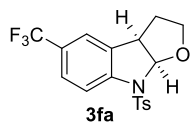

<sup>1</sup>H NMR (500 MHz, CDCl<sub>3</sub>, 298 K)

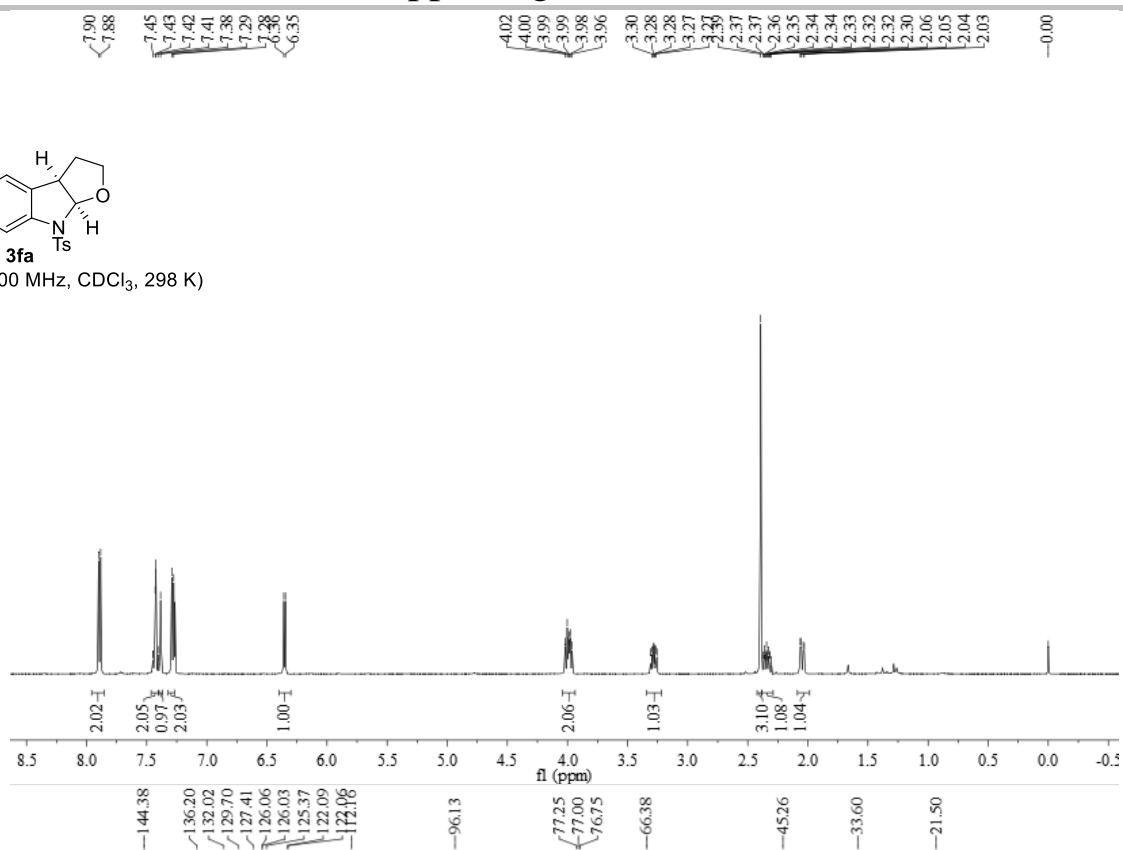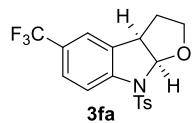

<sup>13</sup>C NMR (126 MHz, CDCl<sub>3</sub>, 298 K)

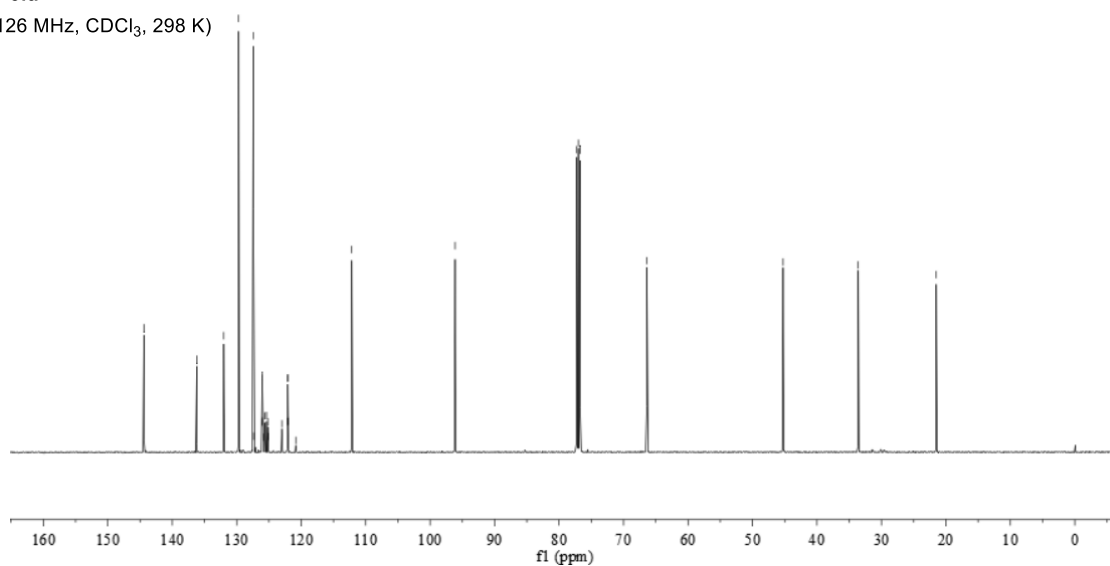

# Supporting Information

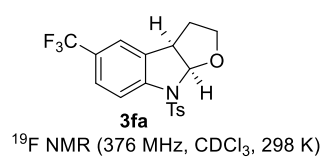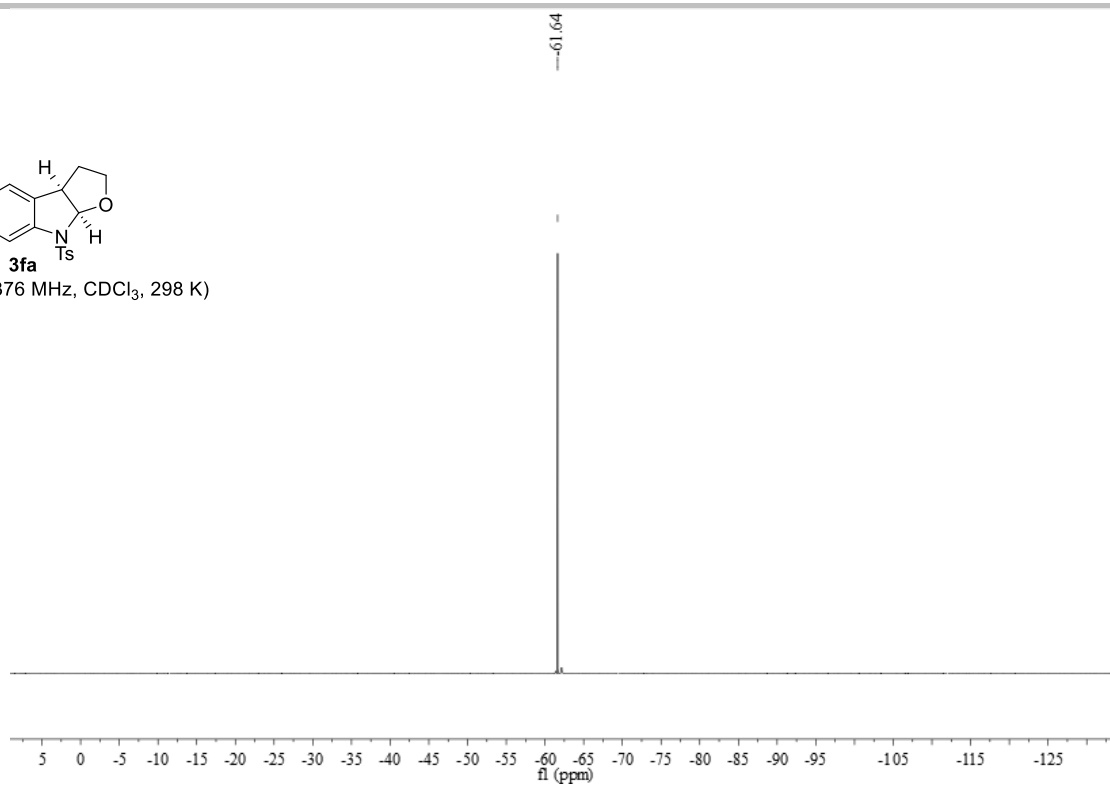

# Supporting Information

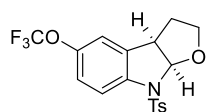

**3ga**

$^1\text{H NMR}$  (500 MHz,  $\text{CDCl}_3$ , 298 K)

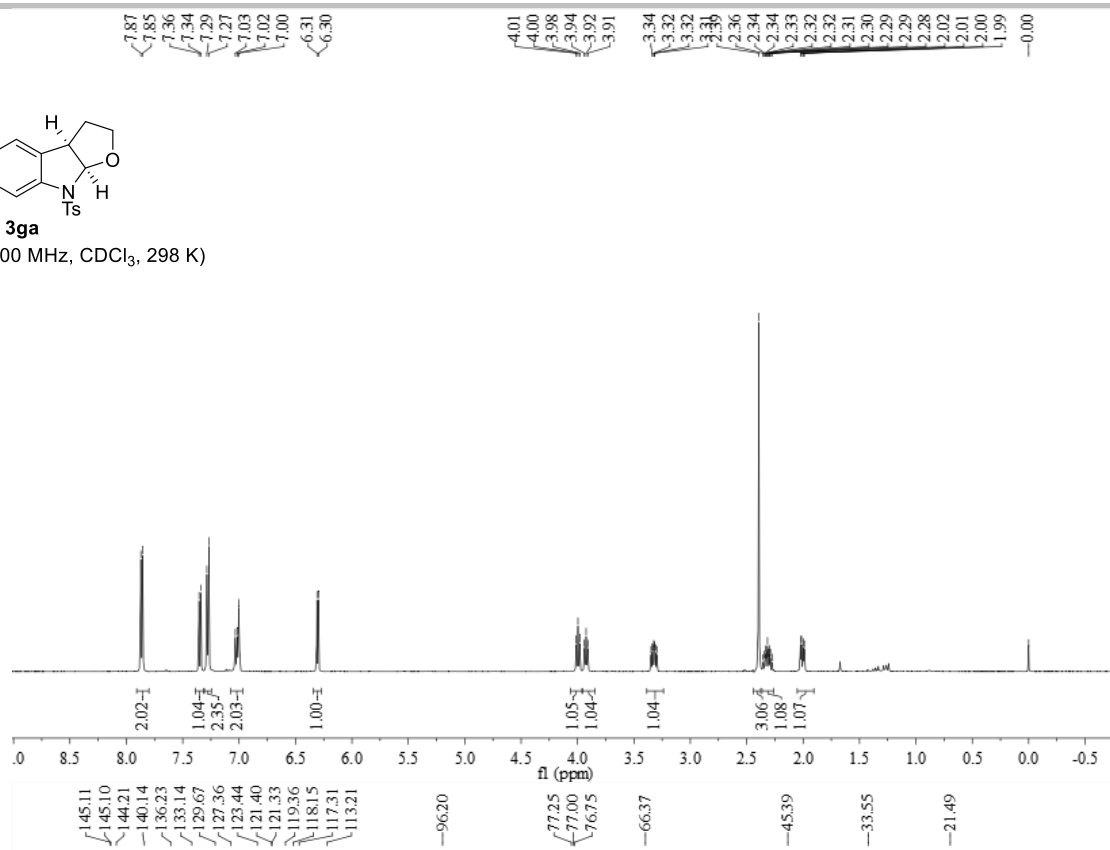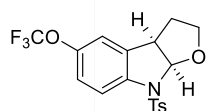

**3ga**

$^{13}\text{C NMR}$  (126 MHz,  $\text{CDCl}_3$ , 298 K)

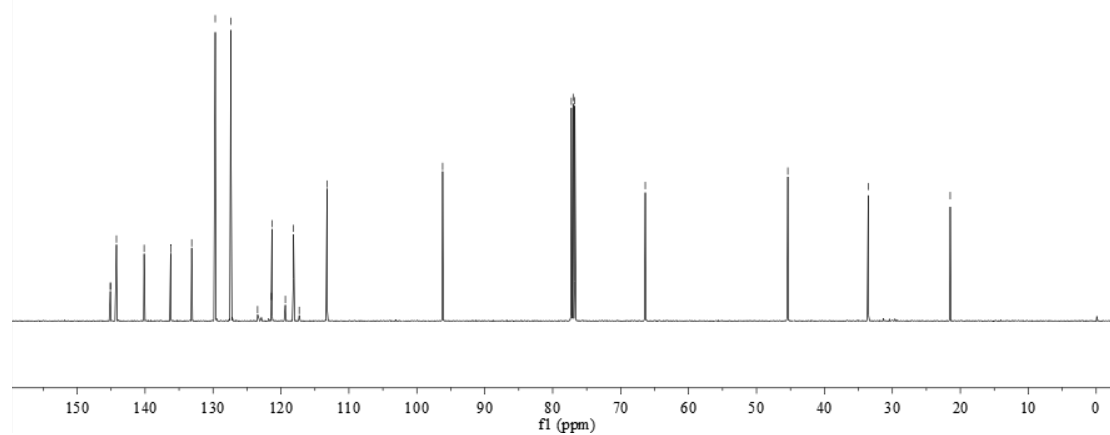

## Supporting Information

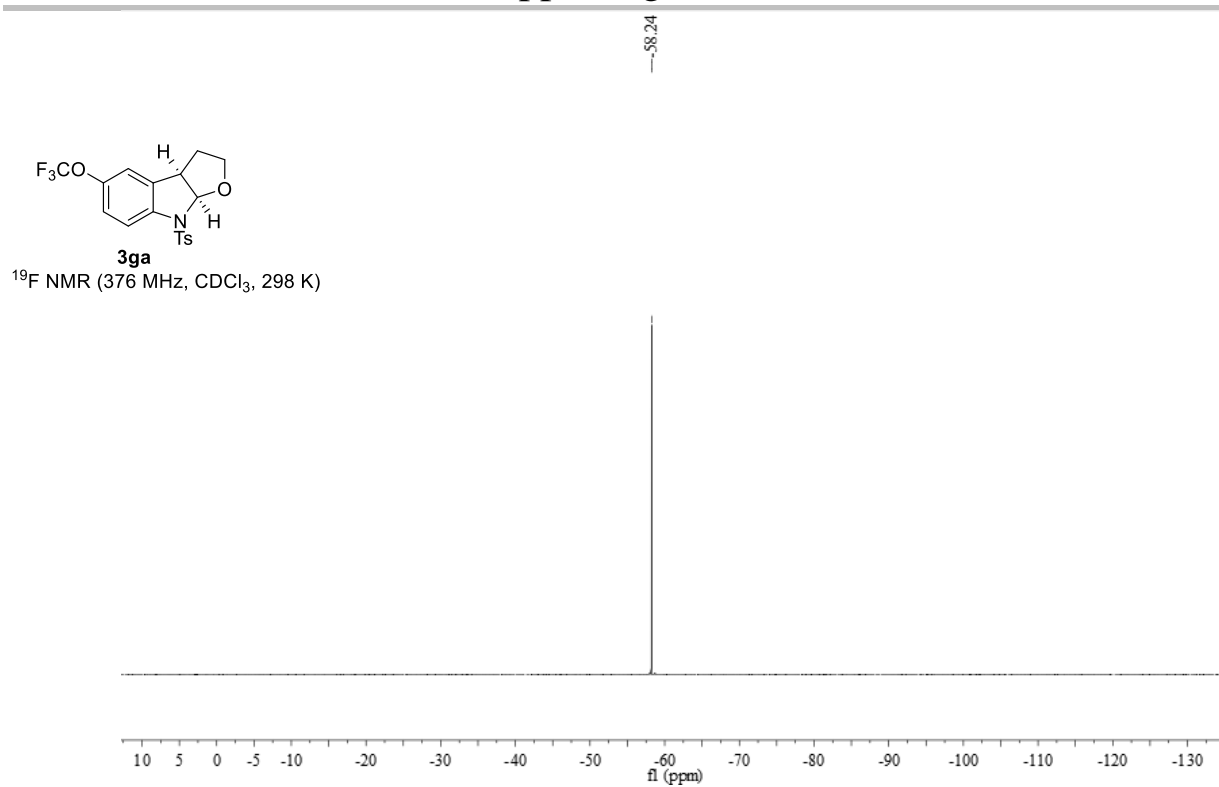

# Supporting Information

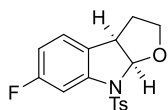

**3ha**

$^1\text{H NMR}$  (500 MHz,  $\text{CDCl}_3$ , 298 K)

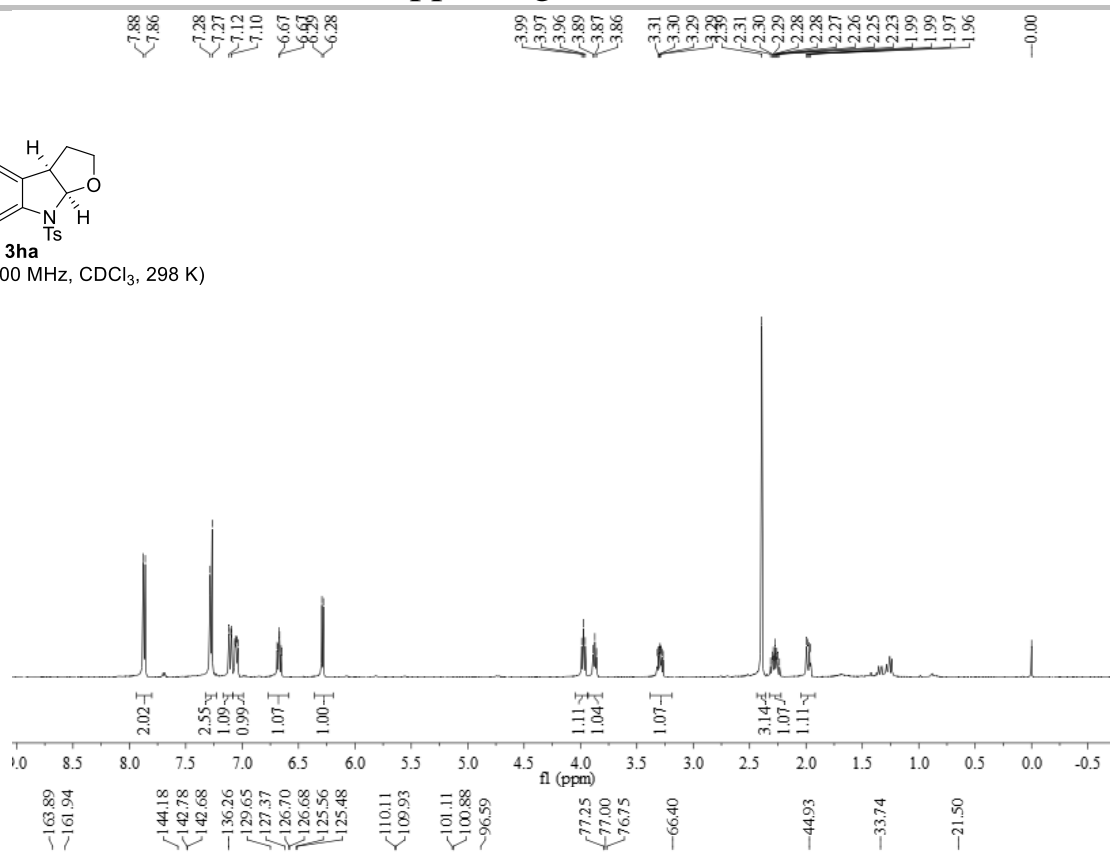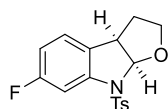

**3ha**

$^{13}\text{C NMR}$  (126 MHz,  $\text{CDCl}_3$ , 298 K)

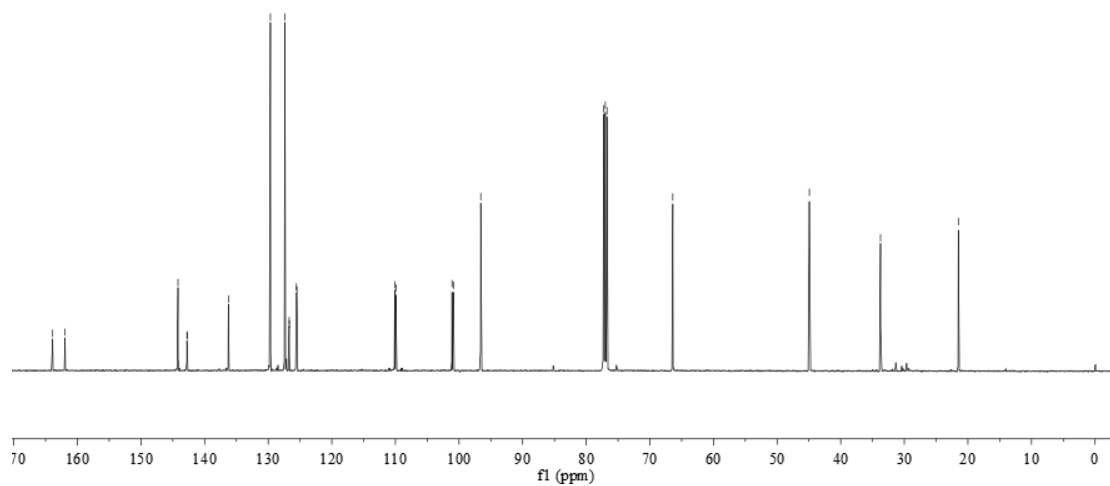

# Supporting Information

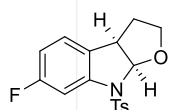

**3ha**

$^{19}\text{F}$  NMR (282 MHz,  $\text{CDCl}_3$ , 298 K)

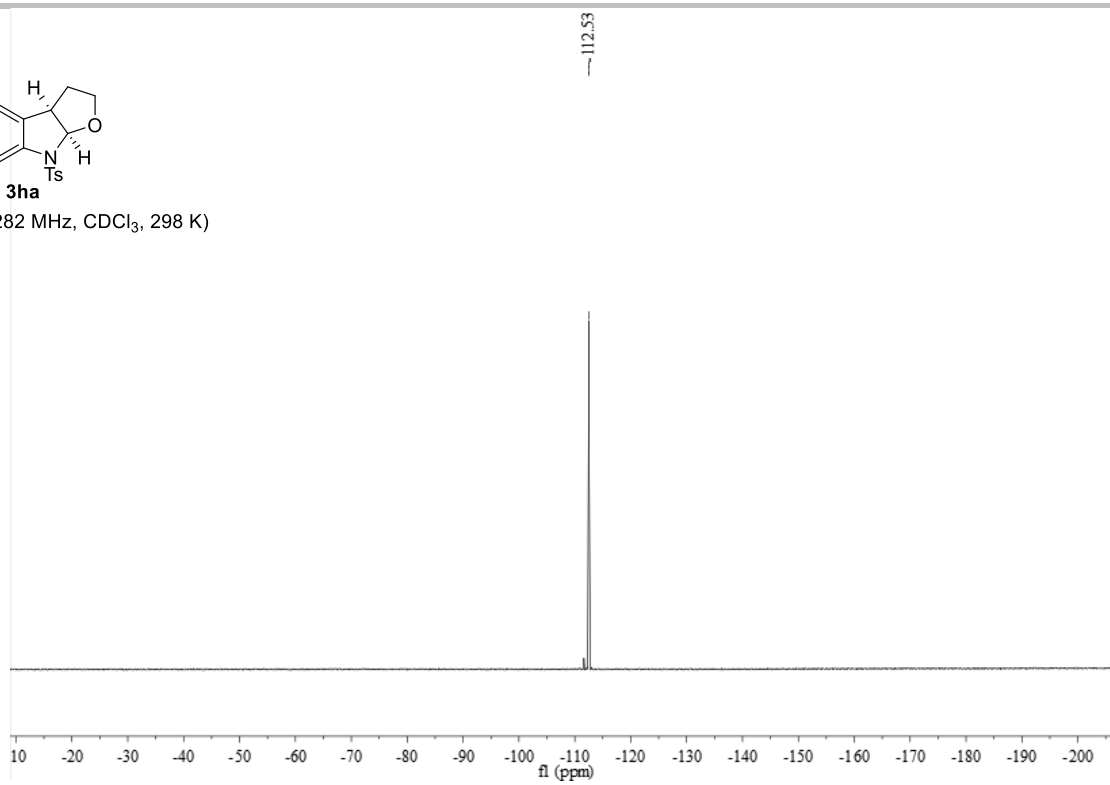

# Supporting Information

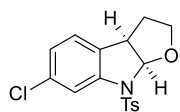

**3ia**

$^1\text{H}$  NMR (500 MHz,  $\text{CDCl}_3$ , 298 K)

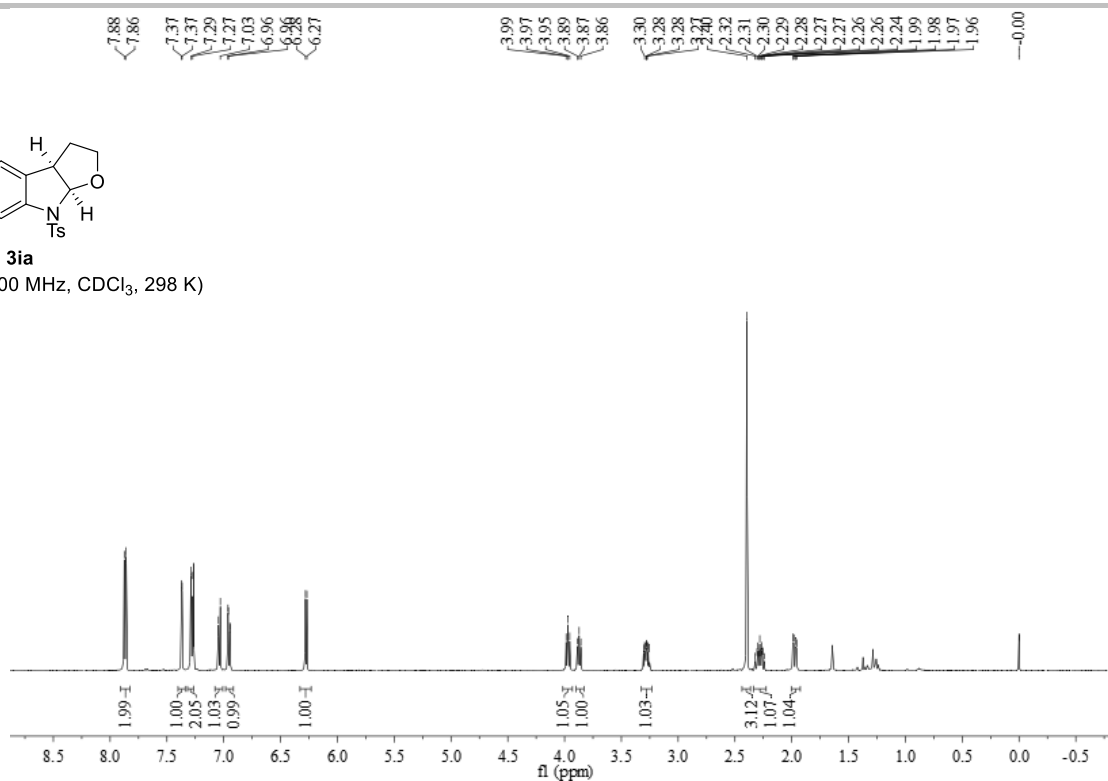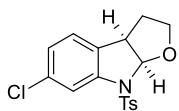

**3ia**

$^{13}\text{C}$  NMR (126 MHz,  $\text{CDCl}_3$ , 298 K)

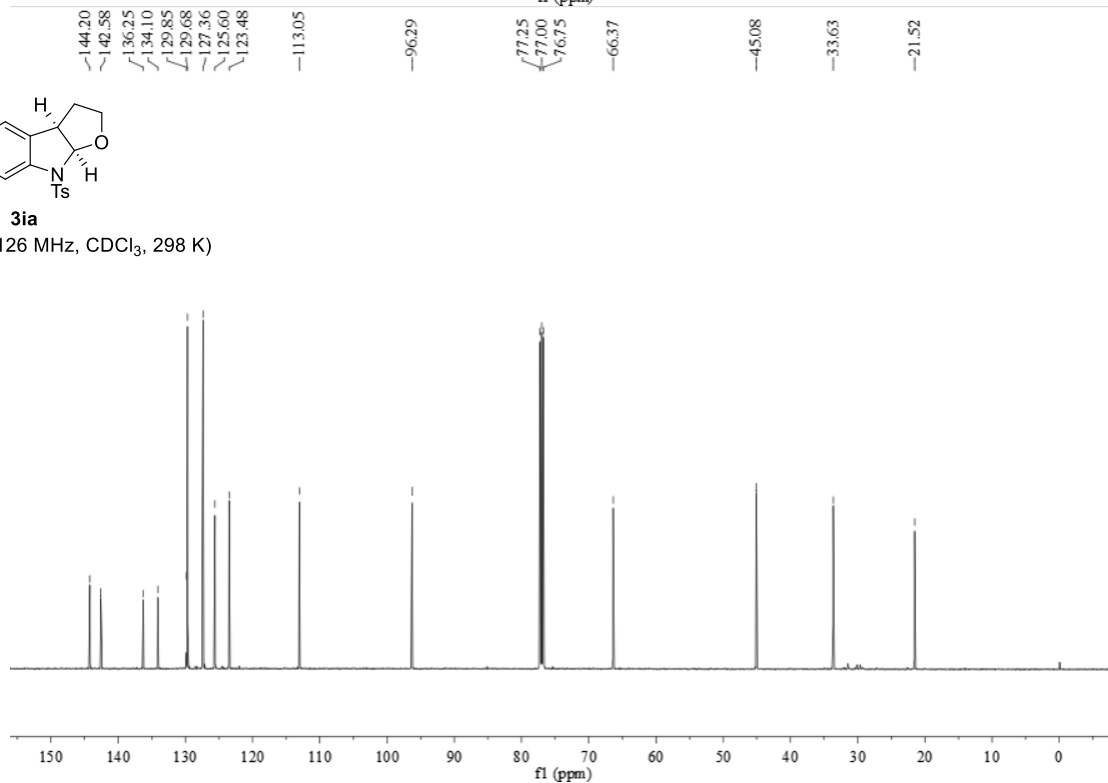

# Supporting Information

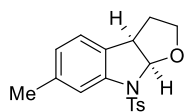

**3ja**

$^1\text{H NMR}$  (500 MHz,  $\text{CDCl}_3$ , 298 K)

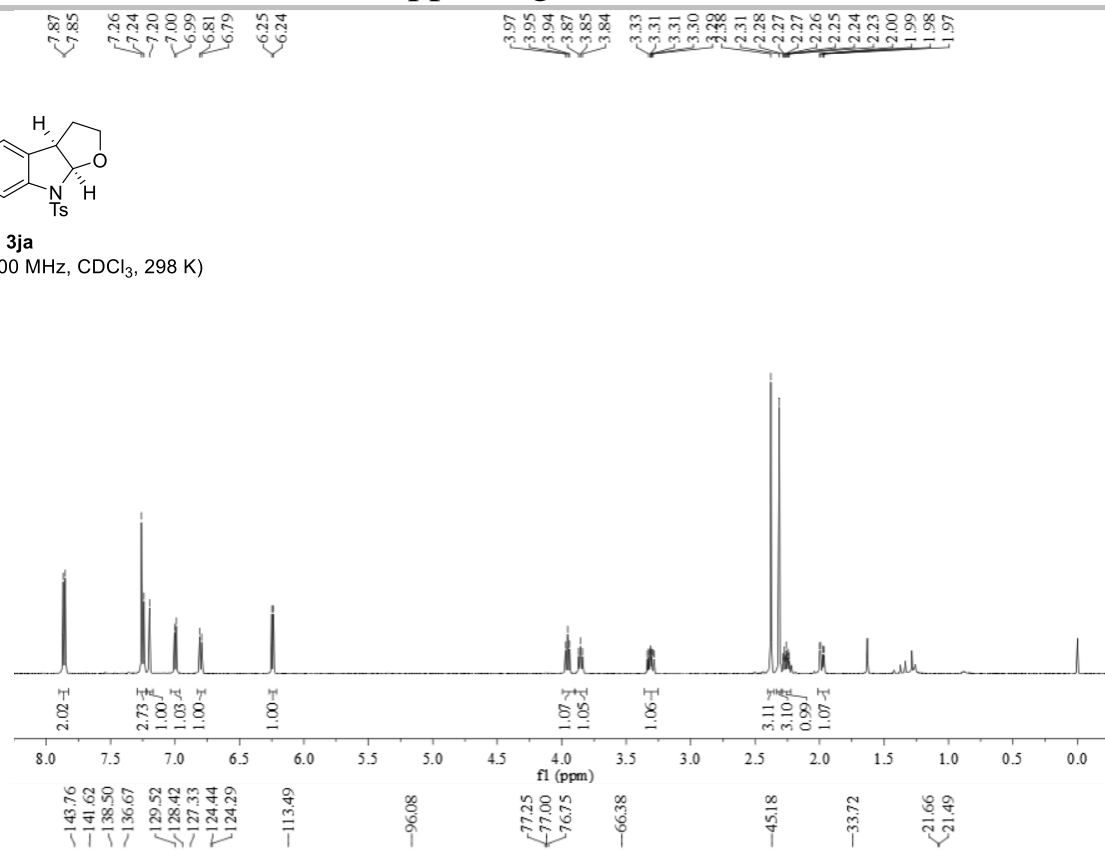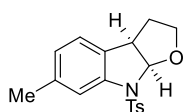

**3ja**

$^{13}\text{C NMR}$  (126 MHz,  $\text{CDCl}_3$ , 298 K)

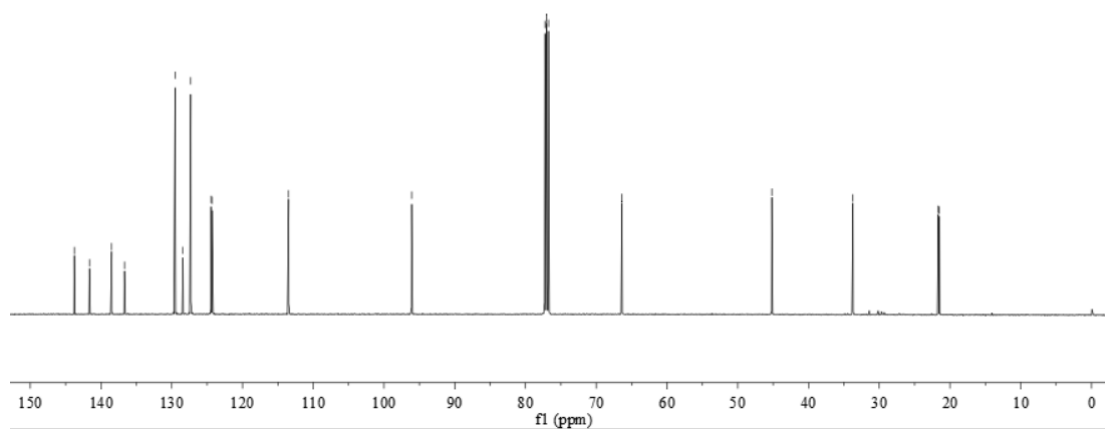



# Supporting Information

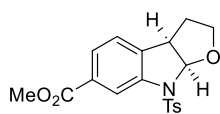

**3ka**

<sup>1</sup>H NMR (500 MHz, CDCl<sub>3</sub>, 298 K)

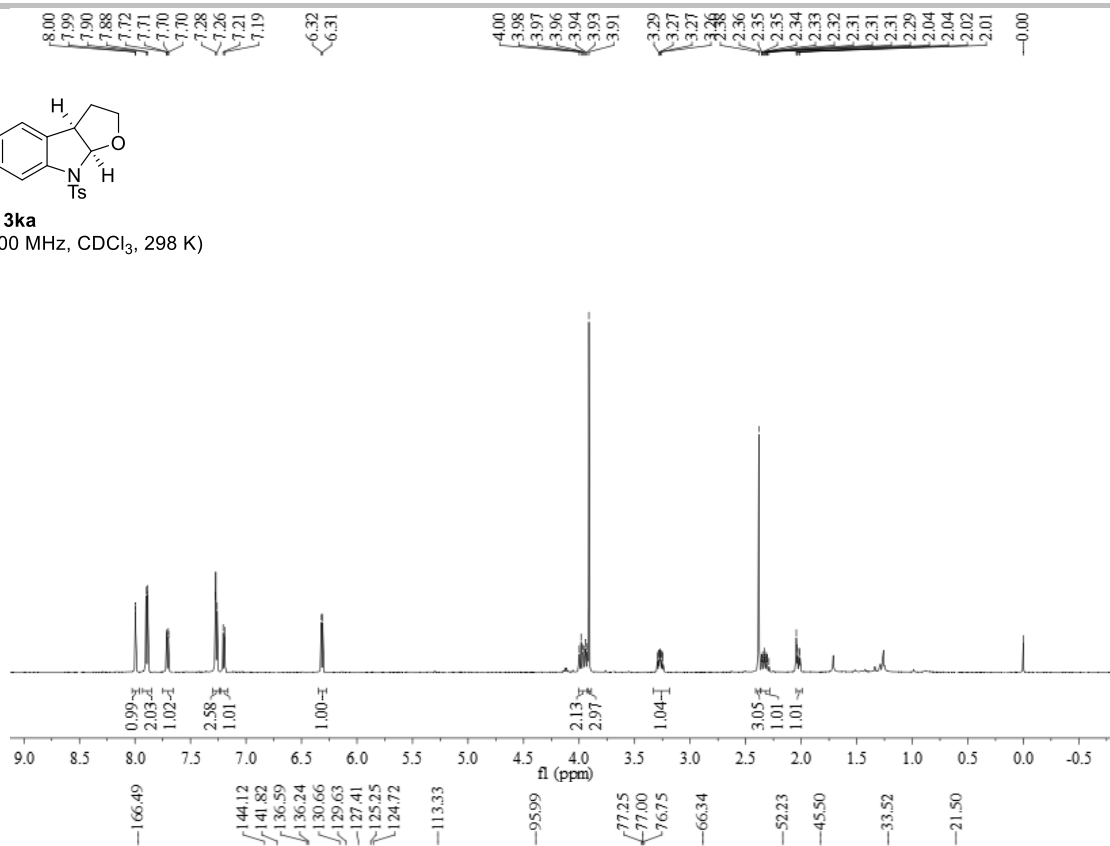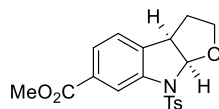

**3ka**

<sup>13</sup>C NMR (126 MHz, CDCl<sub>3</sub>, 298 K)

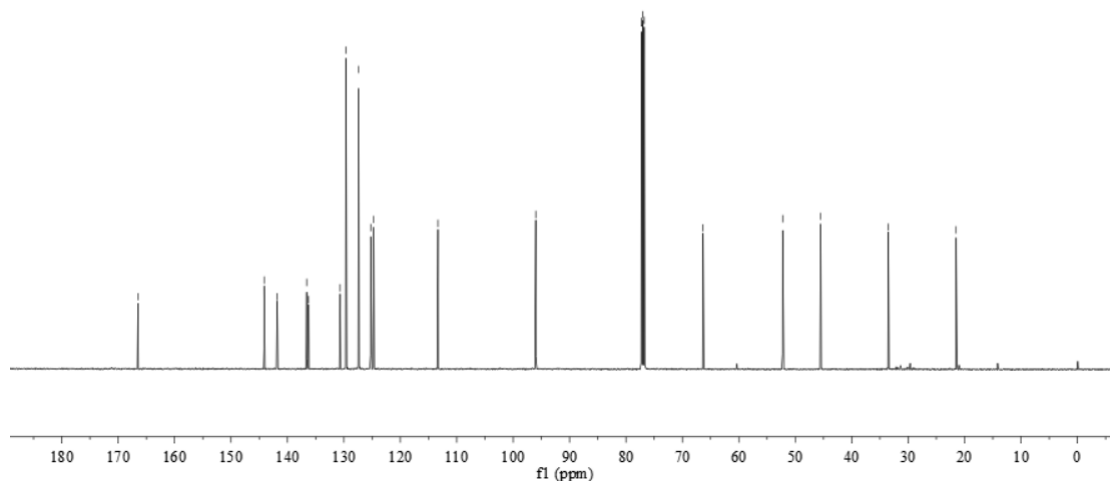

# Supporting Information

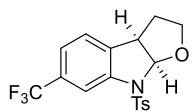

**3a**

$^1\text{H NMR}$  (500 MHz,  $\text{CDCl}_3$ , 298 K)

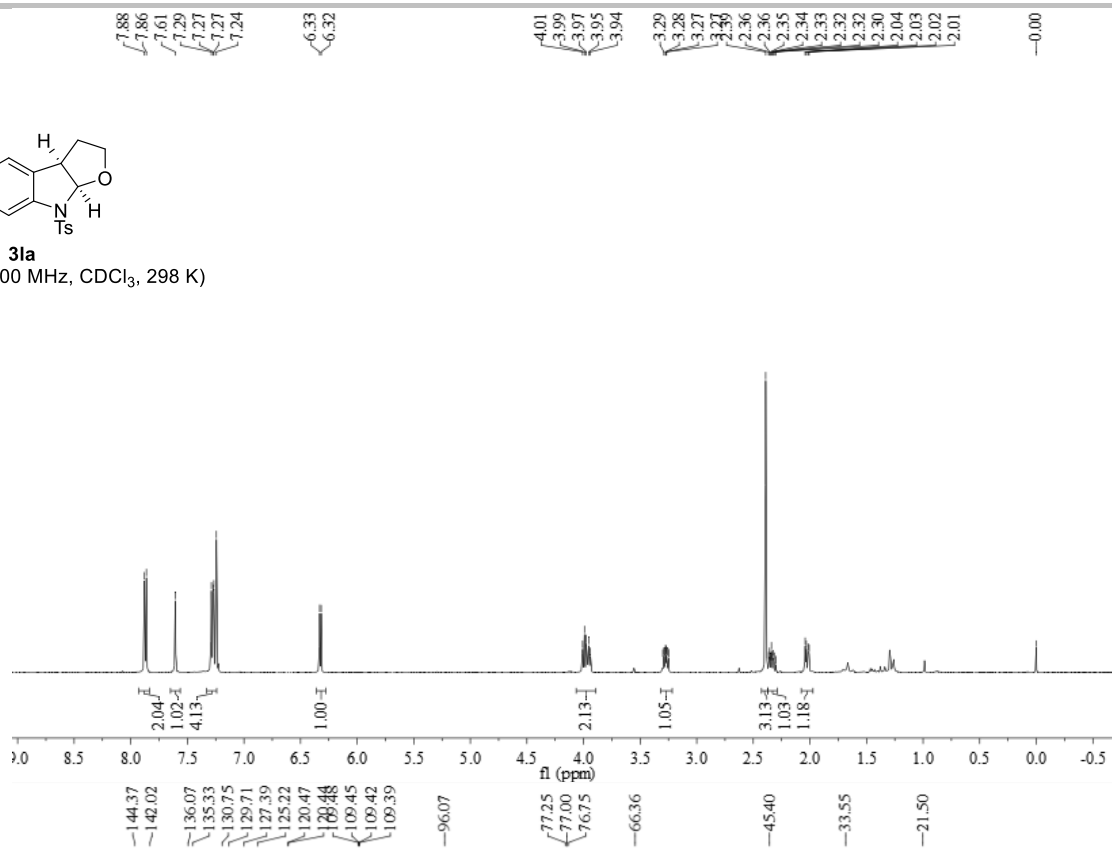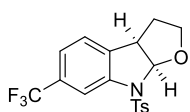

**3a**

$^{13}\text{C NMR}$  (126 MHz,  $\text{CDCl}_3$ , 298 K)

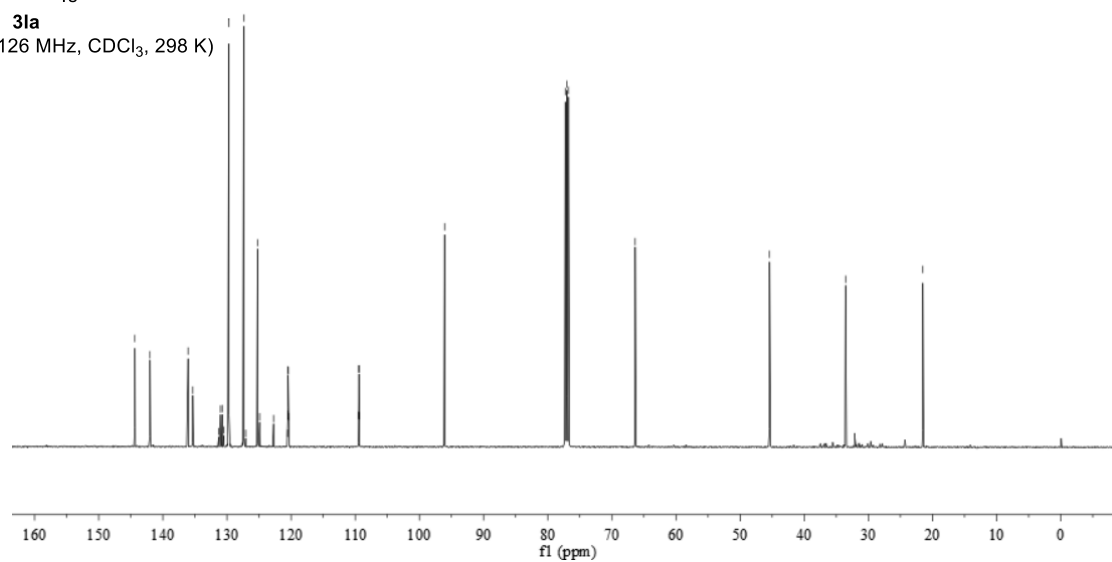

# Supporting Information

-62.34

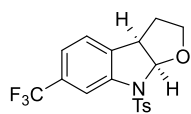

**3la**

<sup>19</sup>F NMR (376 MHz, CDCl<sub>3</sub>, 298 K)

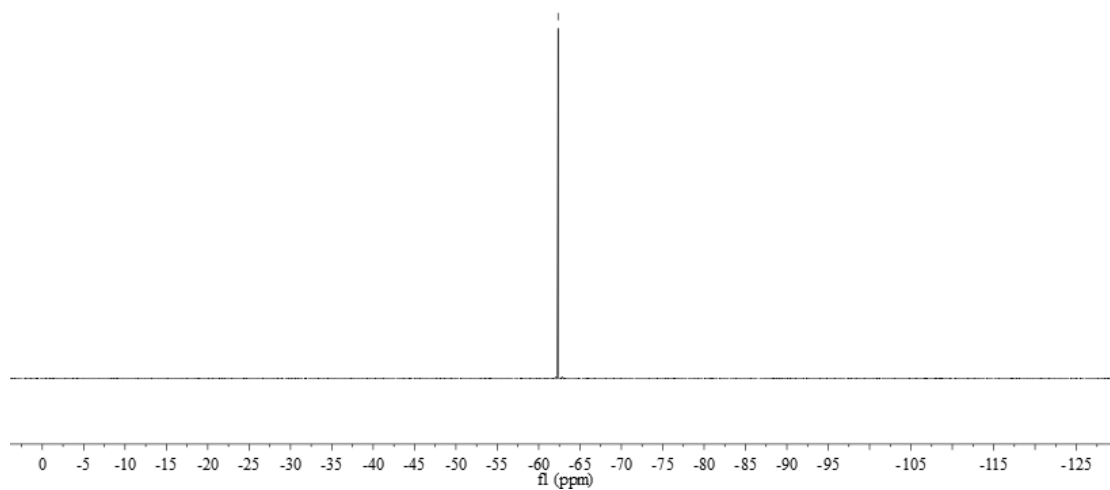

# Supporting Information

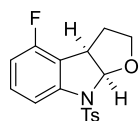

**3ma**

$^1\text{H}$  NMR (500 MHz,  $\text{CDCl}_3$ , 298 K)

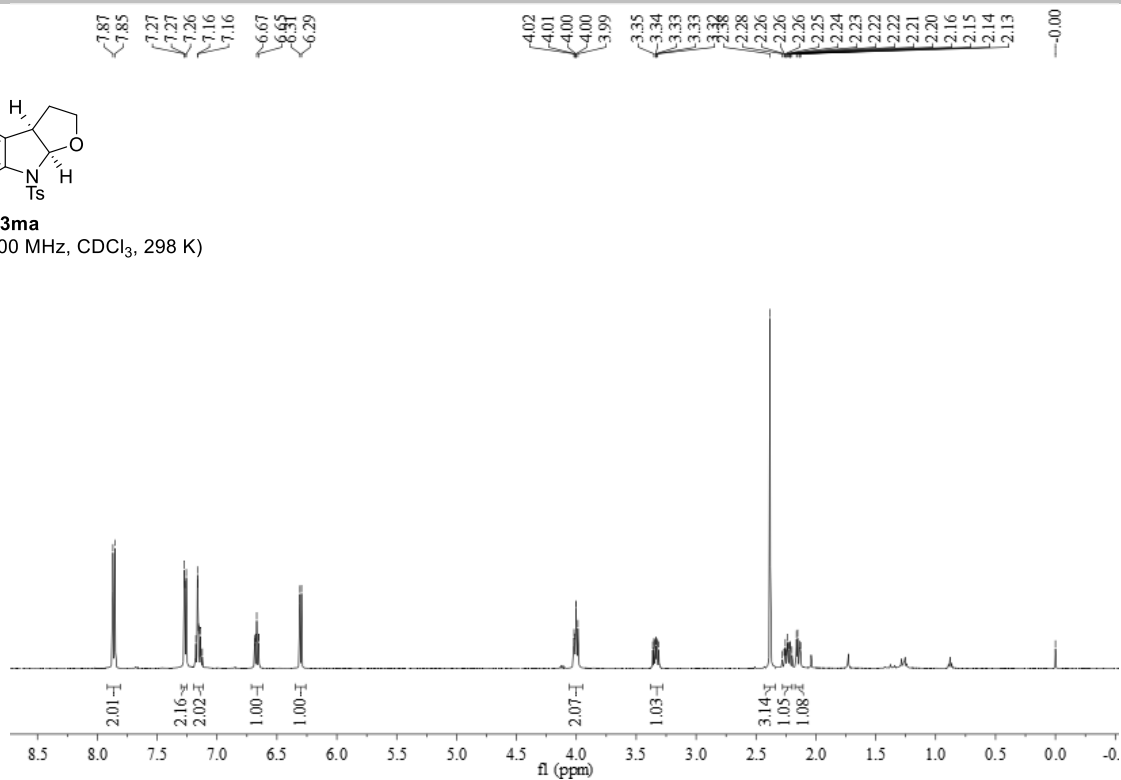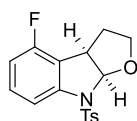

**3ma**

$^{13}\text{C}$  NMR (126 MHz,  $\text{CDCl}_3$ , 298 K)

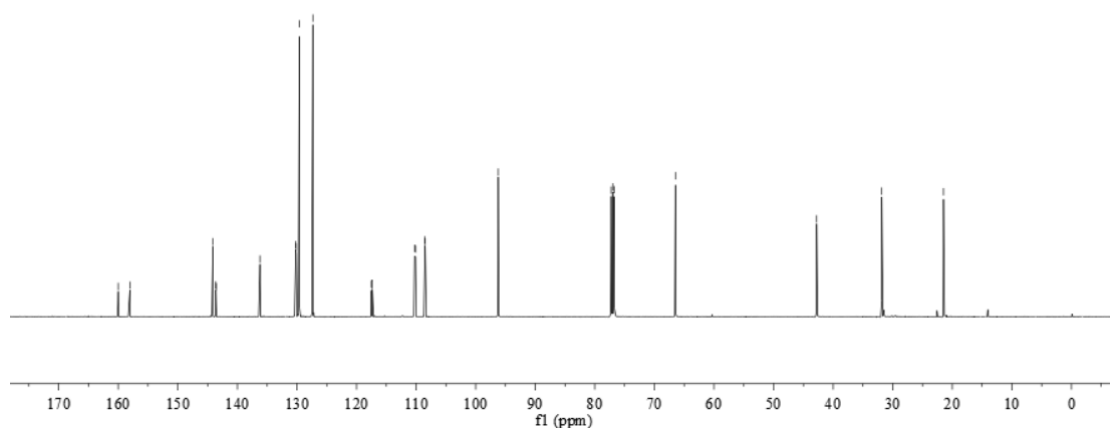

## Supporting Information

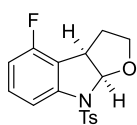

**3ma**

$^{19}\text{F}$  NMR (376 MHz,  $\text{CDCl}_3$ , 298 K)

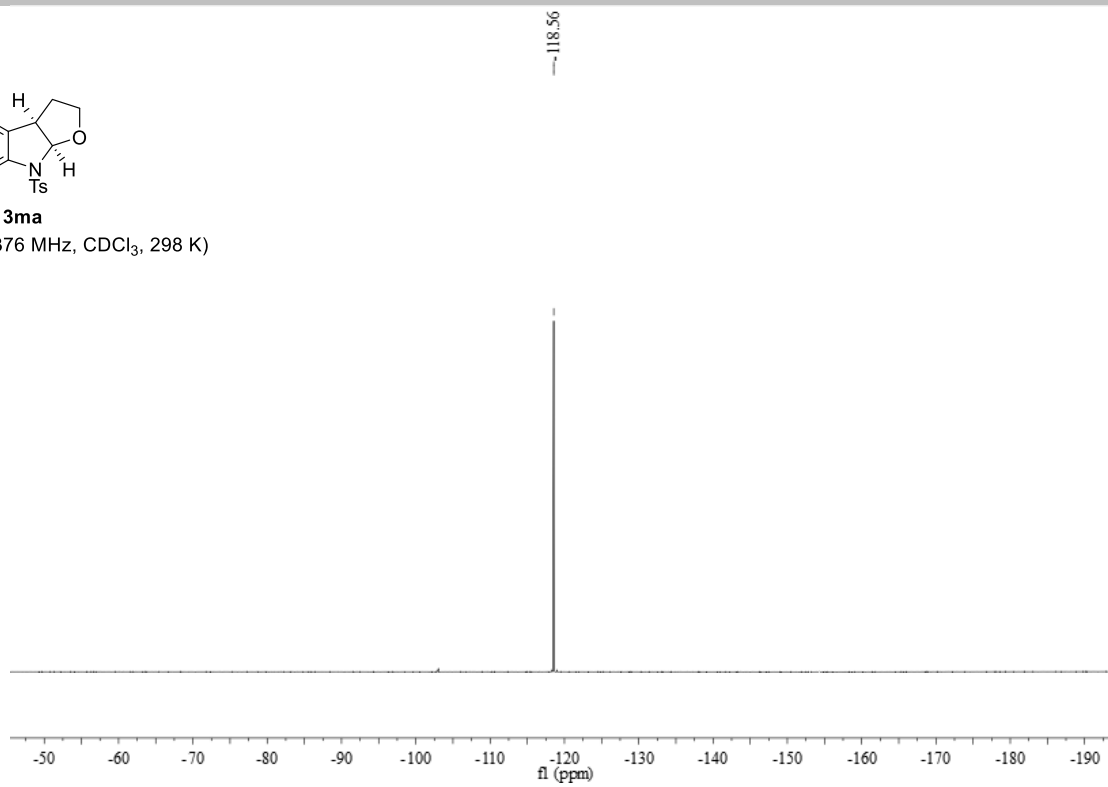

# Supporting Information

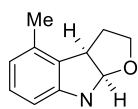

**3na**

$^1\text{H}$  NMR (500 MHz,  $\text{CDCl}_3$ , 298 K)

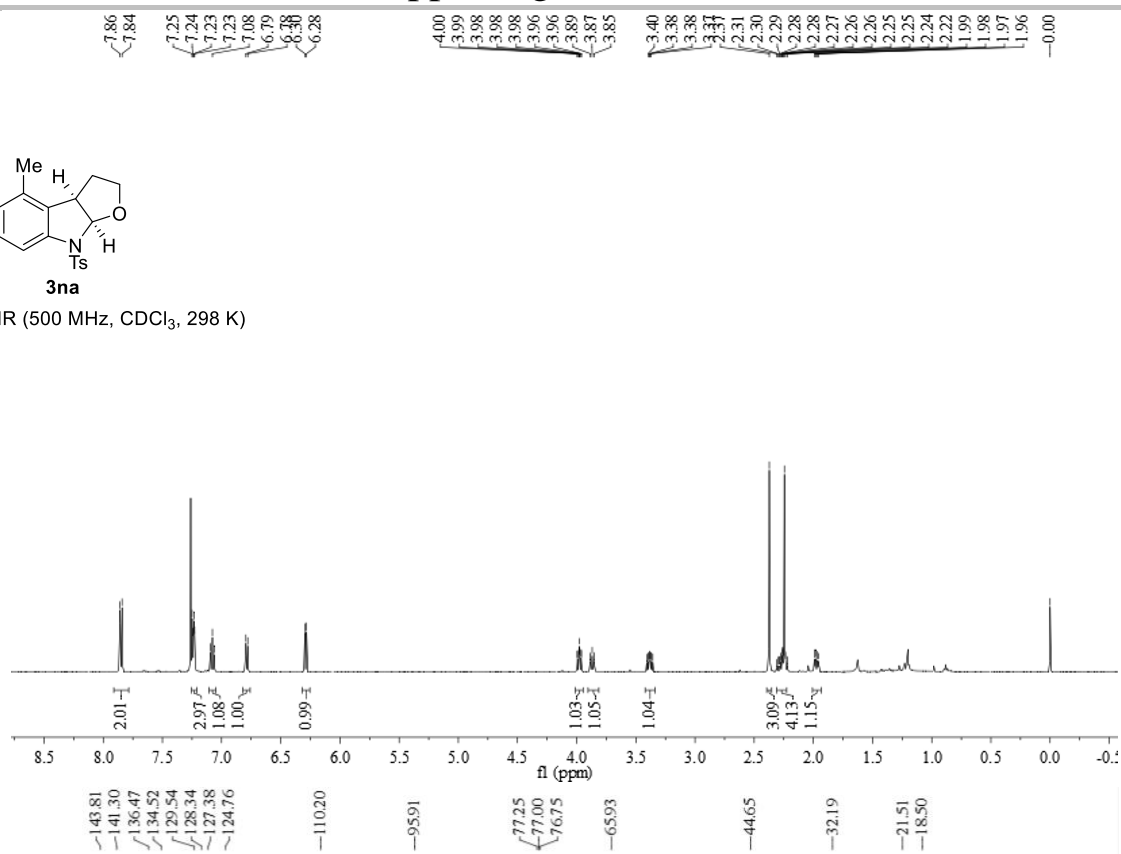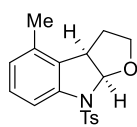

**3na**

$^{13}\text{C}$  NMR (126 MHz,  $\text{CDCl}_3$ , 298 K)

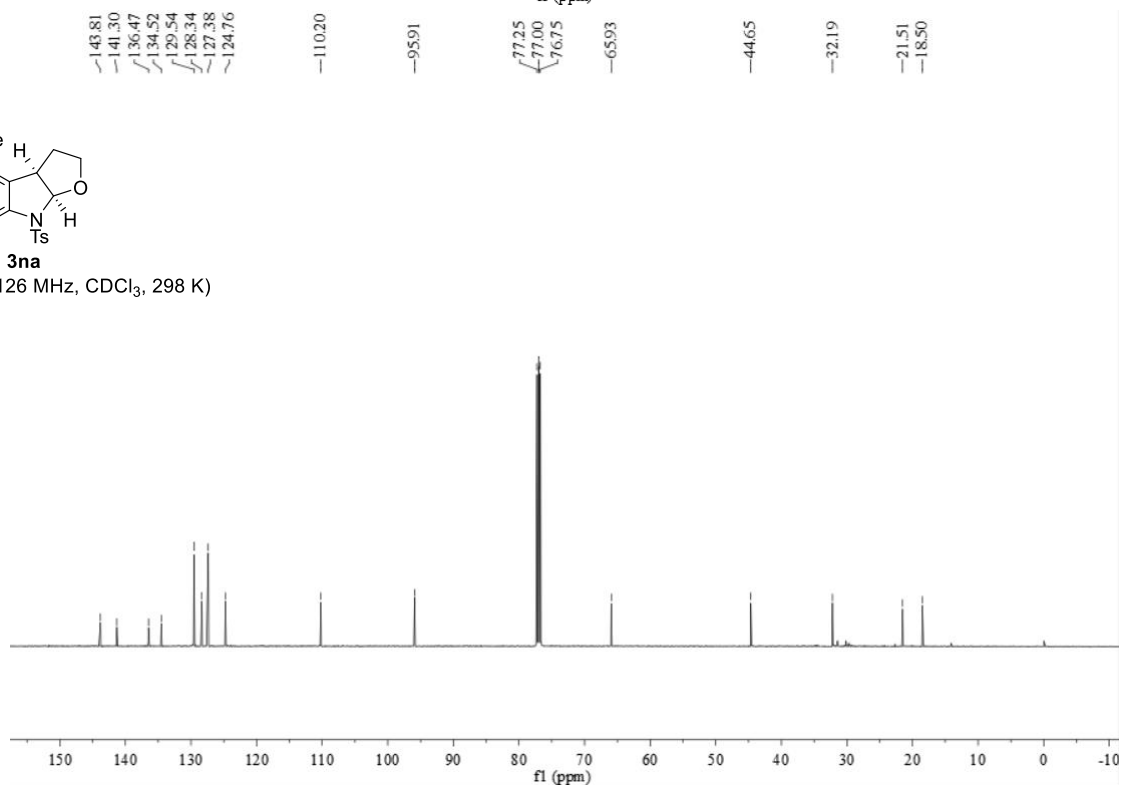

# Supporting Information

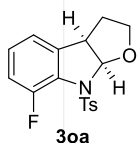

<sup>1</sup>H NMR (500 MHz, CDCl<sub>3</sub>, 298 K)

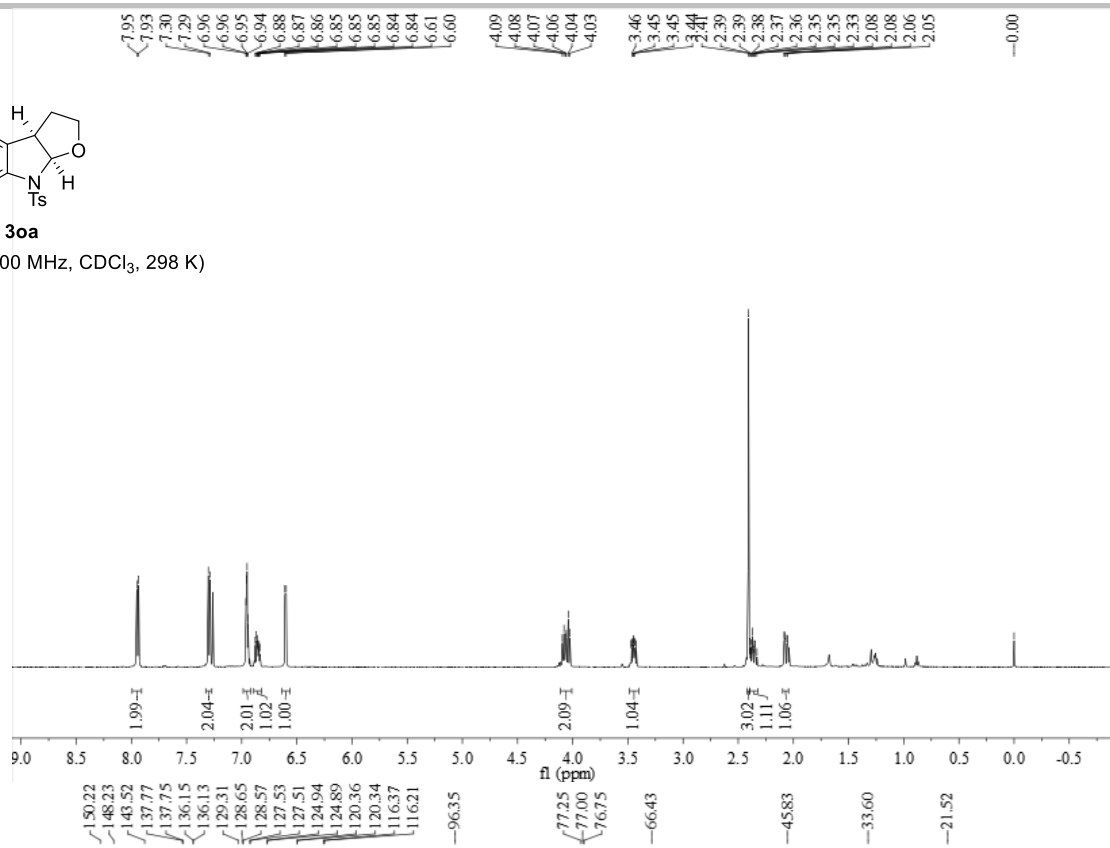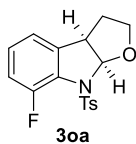

<sup>13</sup>C NMR (126 MHz, CDCl<sub>3</sub>, 298 K)

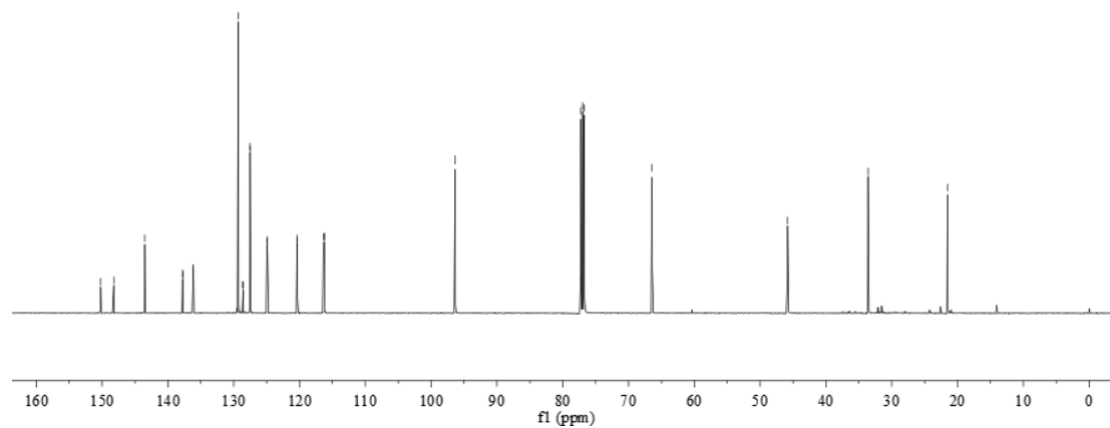

# Supporting Information

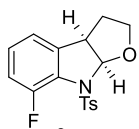

**3oa**  
<sup>19</sup>F NMR (376 MHz, CDCl<sub>3</sub>, 298 K)

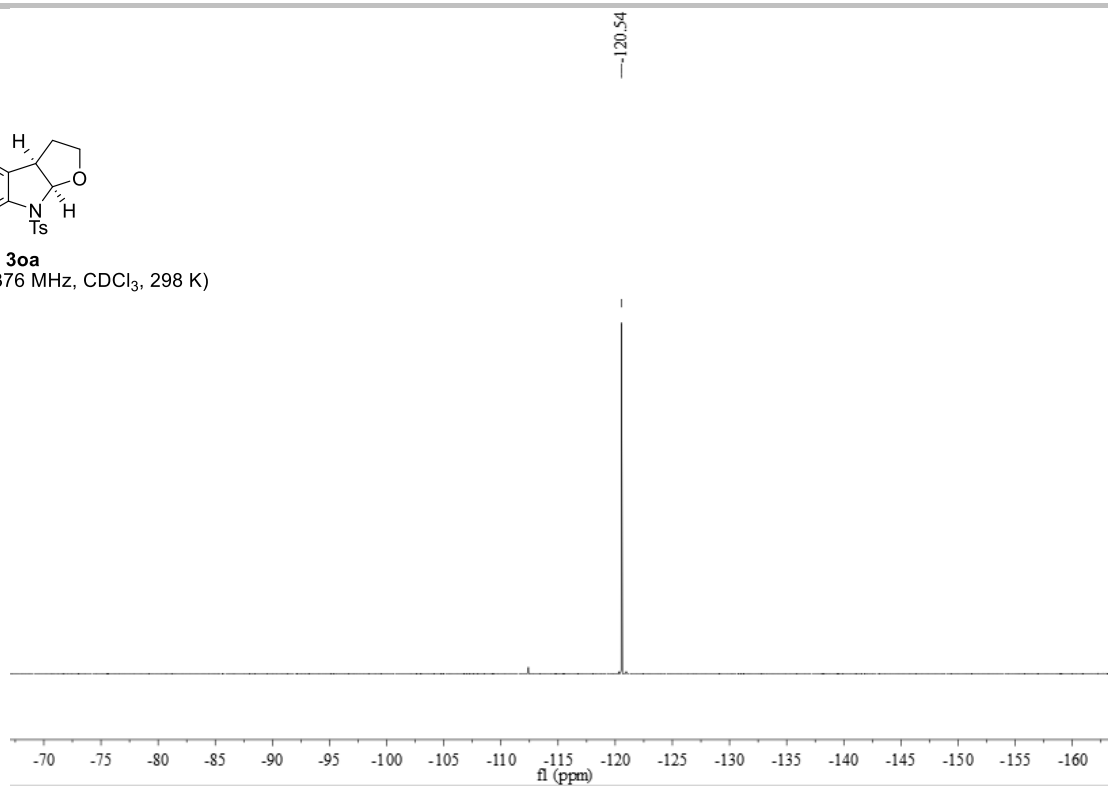



# Supporting Information

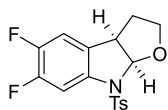

**3pa**

$^1\text{H}$  NMR (500 MHz,  $\text{CDCl}_3$ , 298 K)

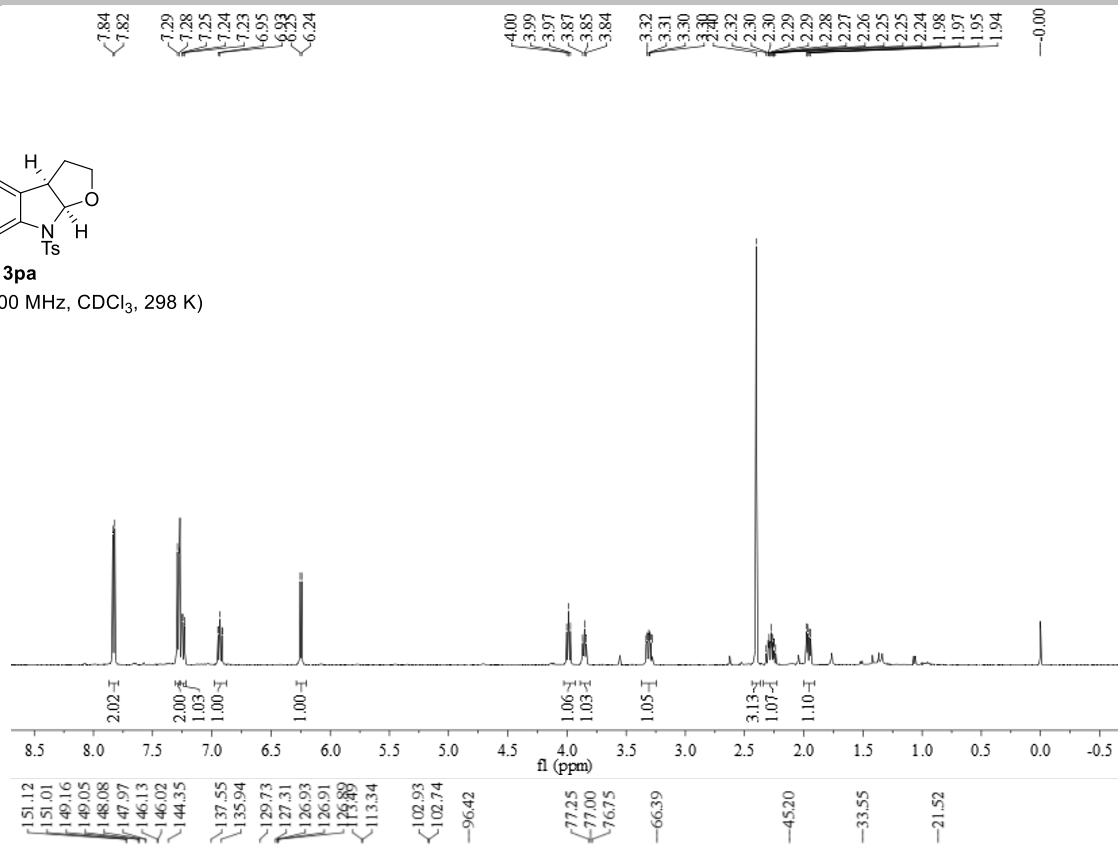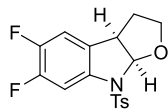

**3pa**

$^{13}\text{C}$  NMR (126 MHz,  $\text{CDCl}_3$ , 298 K)

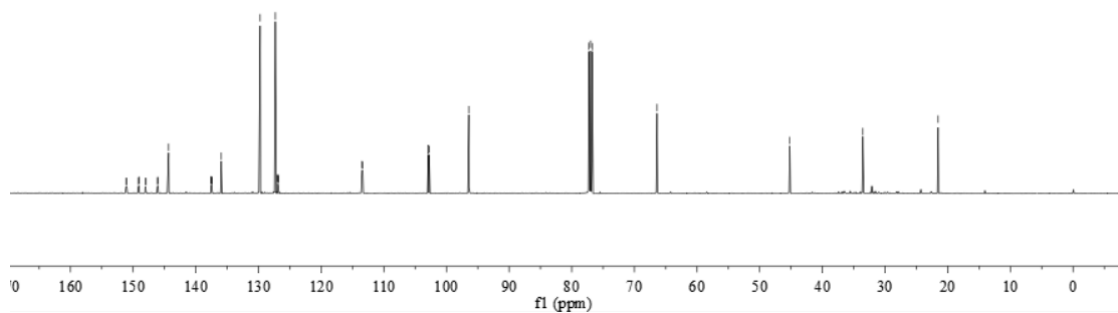

# Supporting Information

136.06  
136.12  
143.59  
143.64

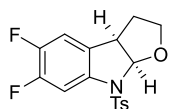

**3pa**

<sup>19</sup>F NMR (376 MHz, CDCl<sub>3</sub>, 298 K)

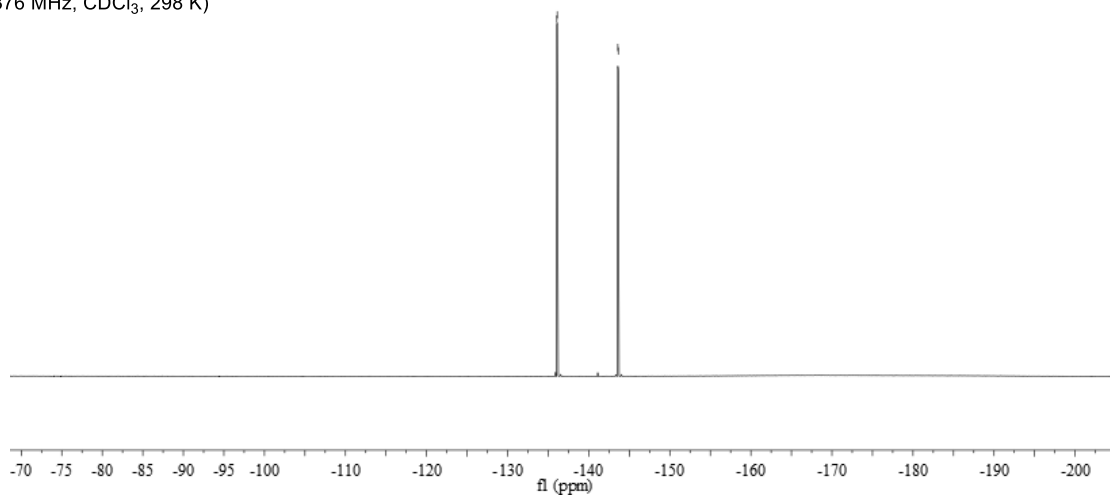

# Supporting Information

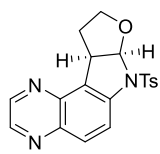

**3qa**

$^1\text{H}$  NMR (500 MHz,  $\text{CDCl}_3$ , 298 K)

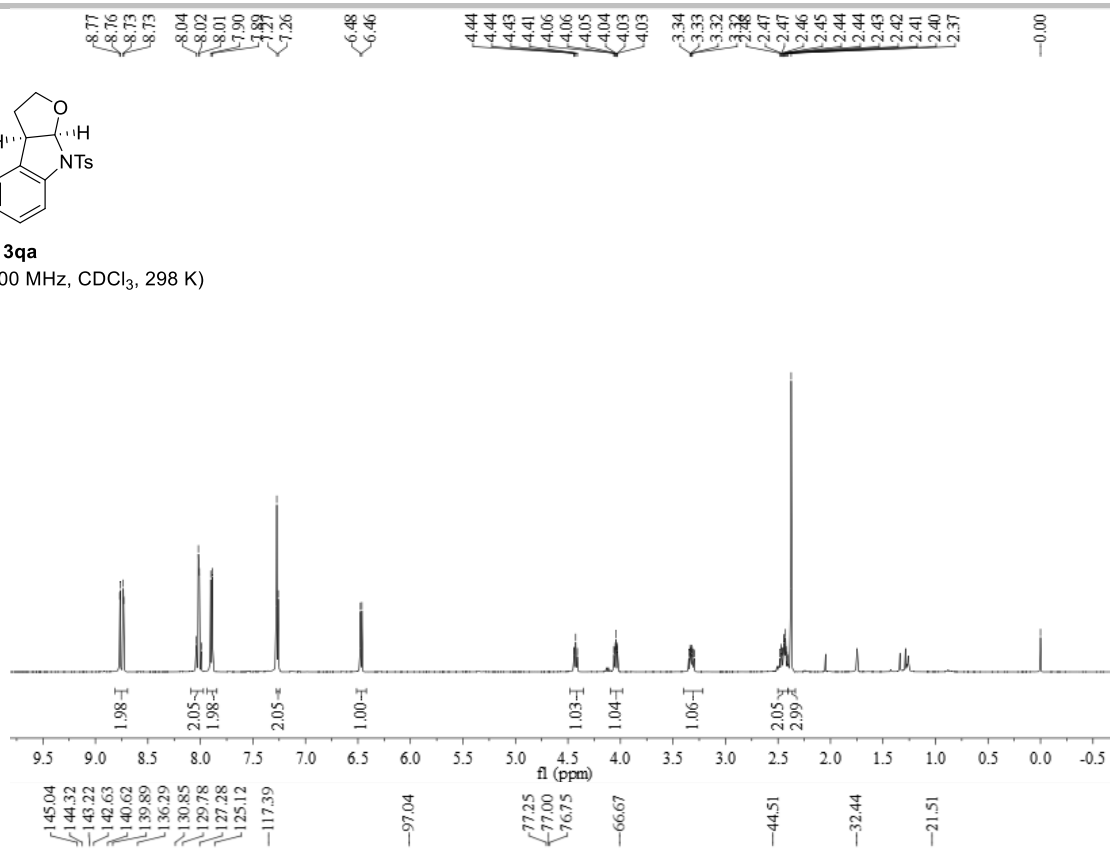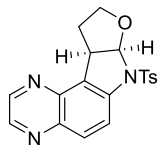

**3qa**

$^{13}\text{C}$  NMR (126 MHz,  $\text{CDCl}_3$ , 298 K)

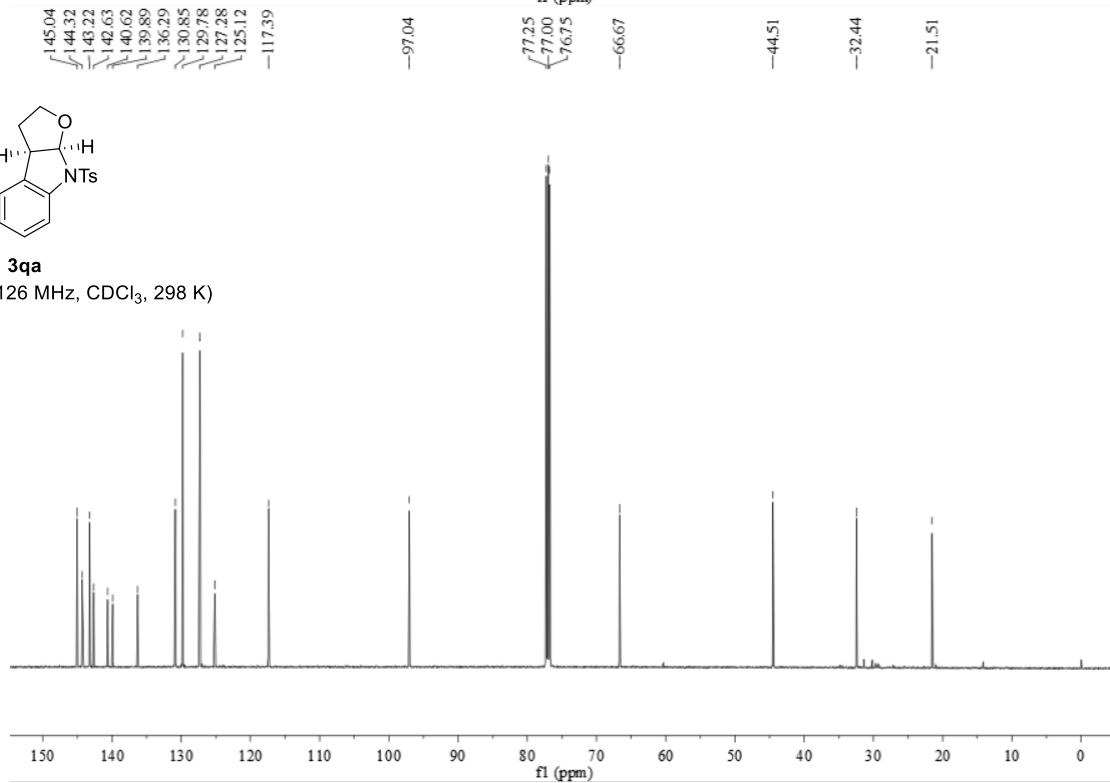

# Supporting Information

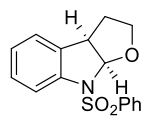

**3ra**

$^1\text{H}$  NMR (500 MHz,  $\text{CDCl}_3$ , 298 K)

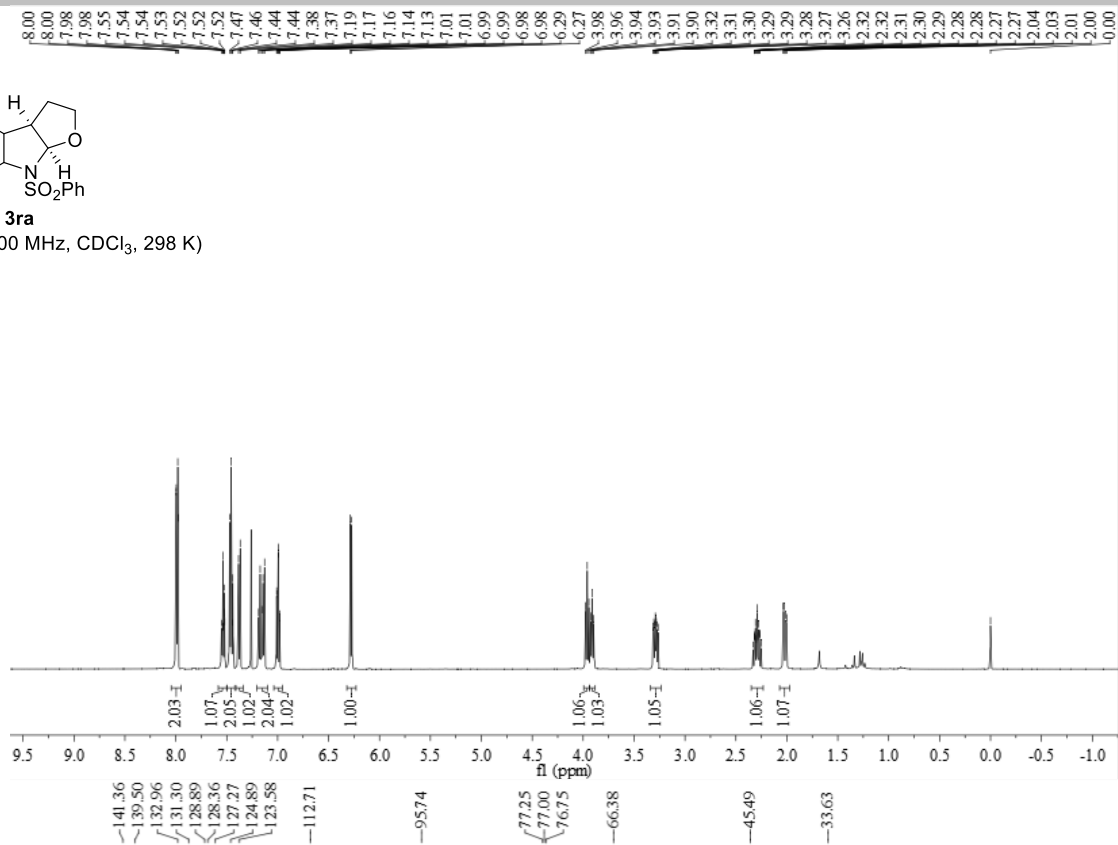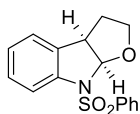

**3ra**

$^{13}\text{C}$  NMR (126 MHz,  $\text{CDCl}_3$ , 298 K)

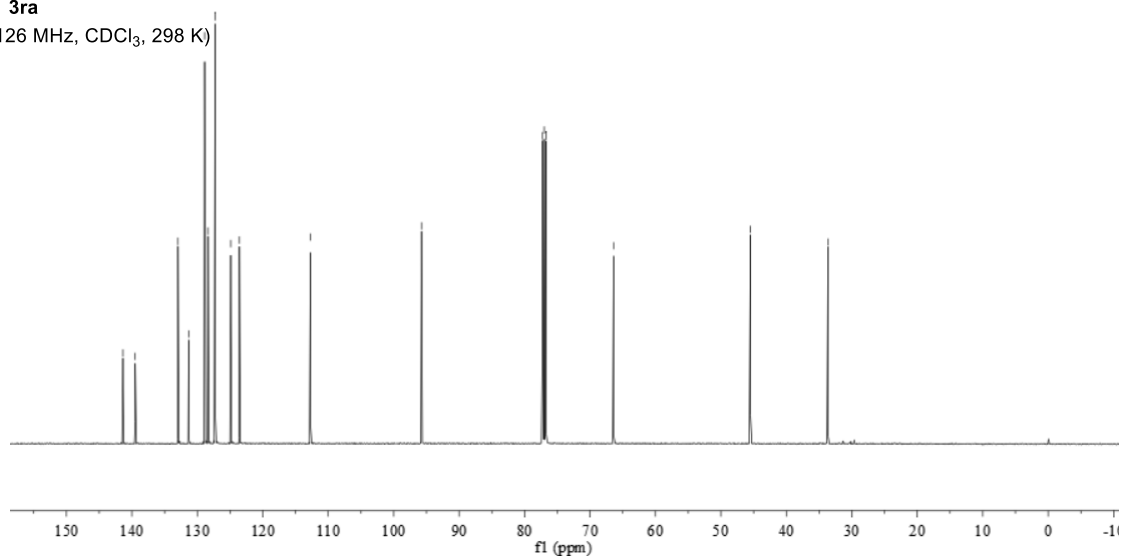

# Supporting Information

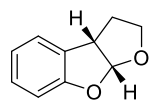

**6aa**

$^1\text{H}$  NMR (500 MHz,  $\text{CDCl}_3$ , 298 K)

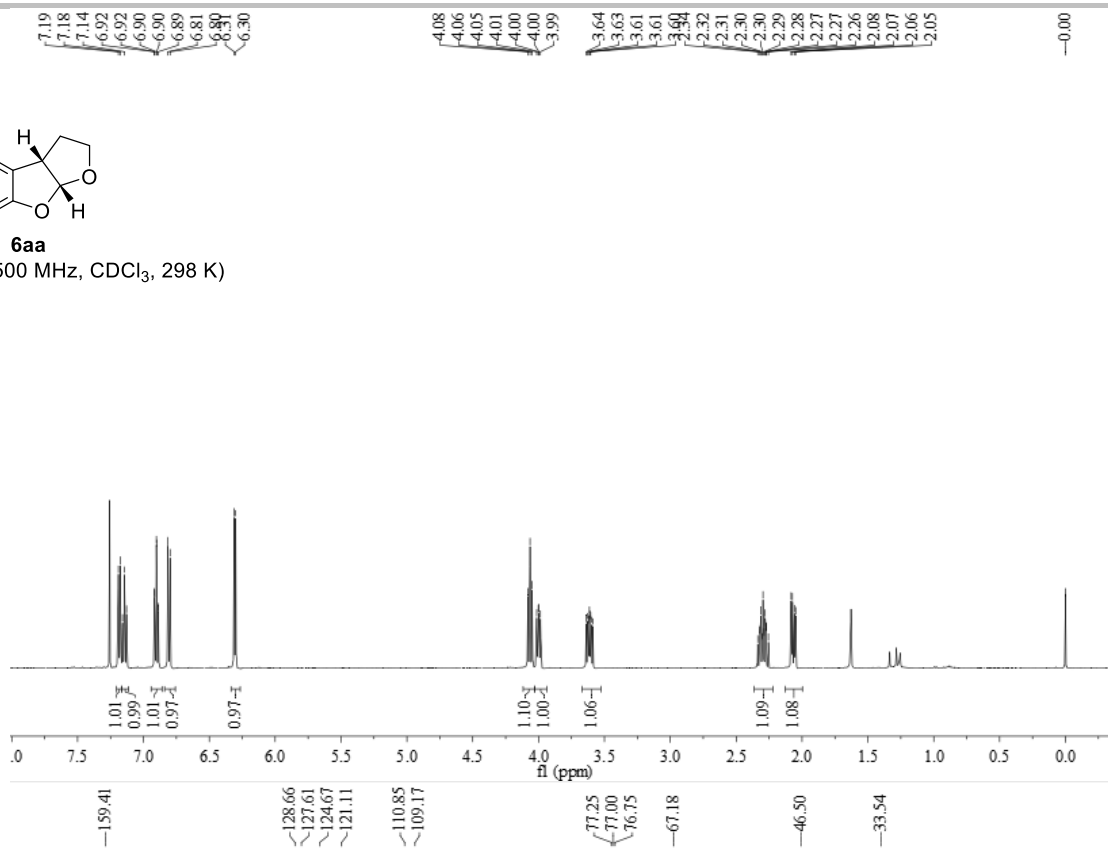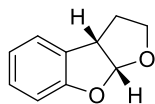

**6aa**

$^{13}\text{C}$  NMR (126 MHz,  $\text{CDCl}_3$ , 298 K)

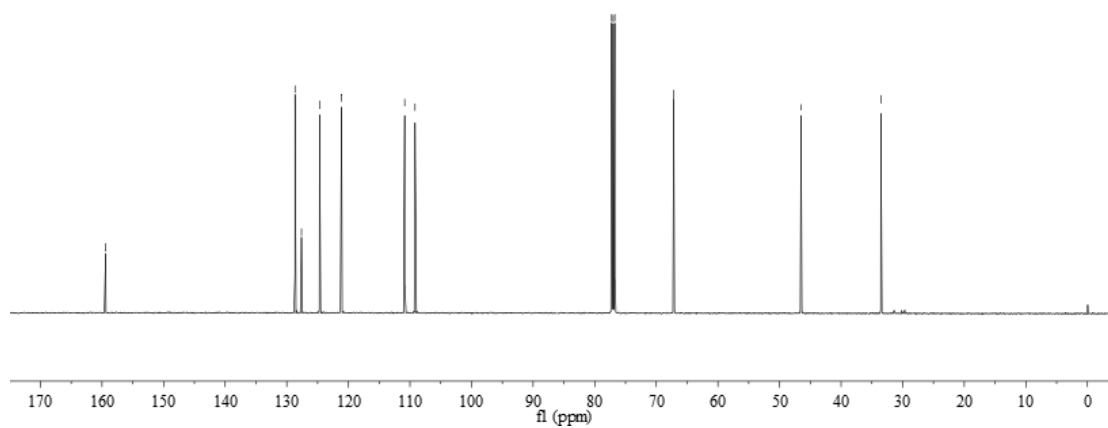

# Supporting Information

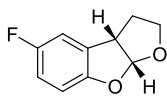

**6ba**

$^1\text{H NMR}$  (500 MHz,  $\text{CDCl}_3$ , 298 K)

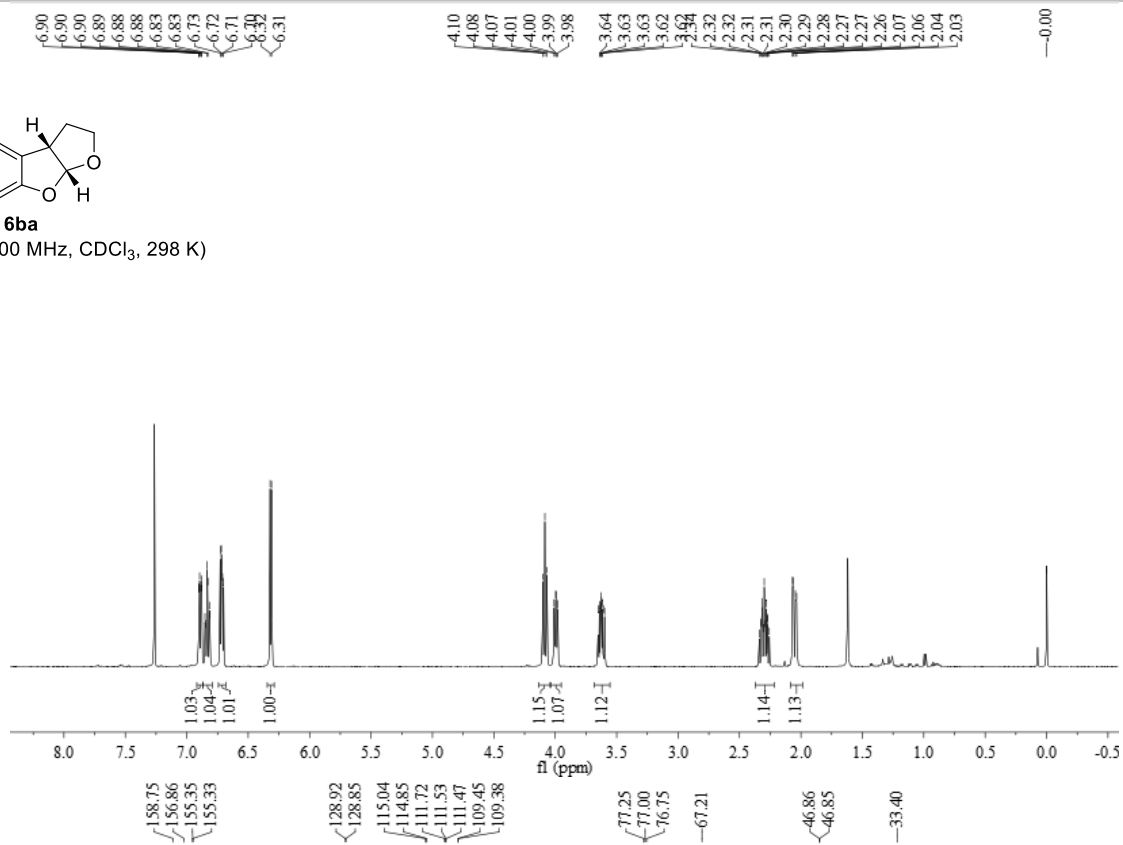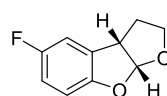

**6ba**

$^{13}\text{C NMR}$  (126 MHz,  $\text{CDCl}_3$ , 298 K)

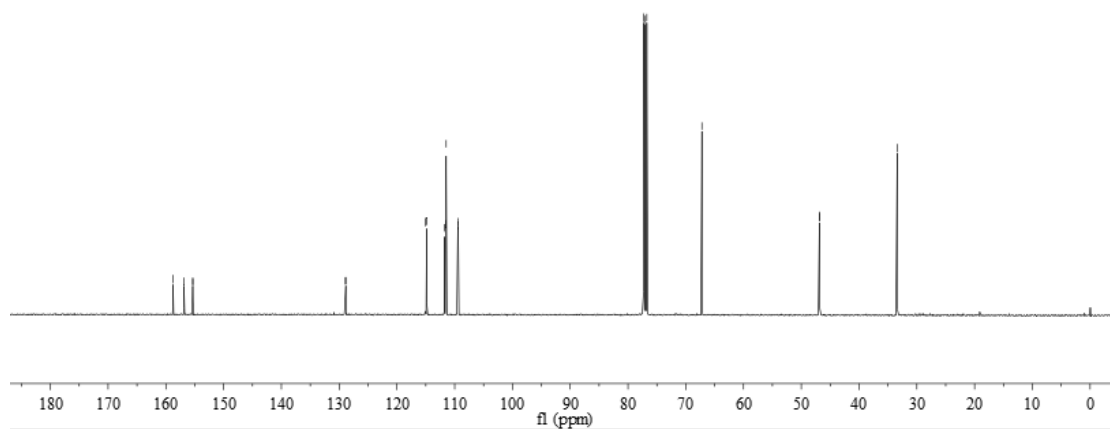

# Supporting Information

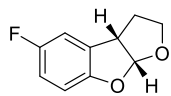

**6ba**

$^{19}\text{F}$  NMR (376 MHz,  $\text{CDCl}_3$ , 298 K)

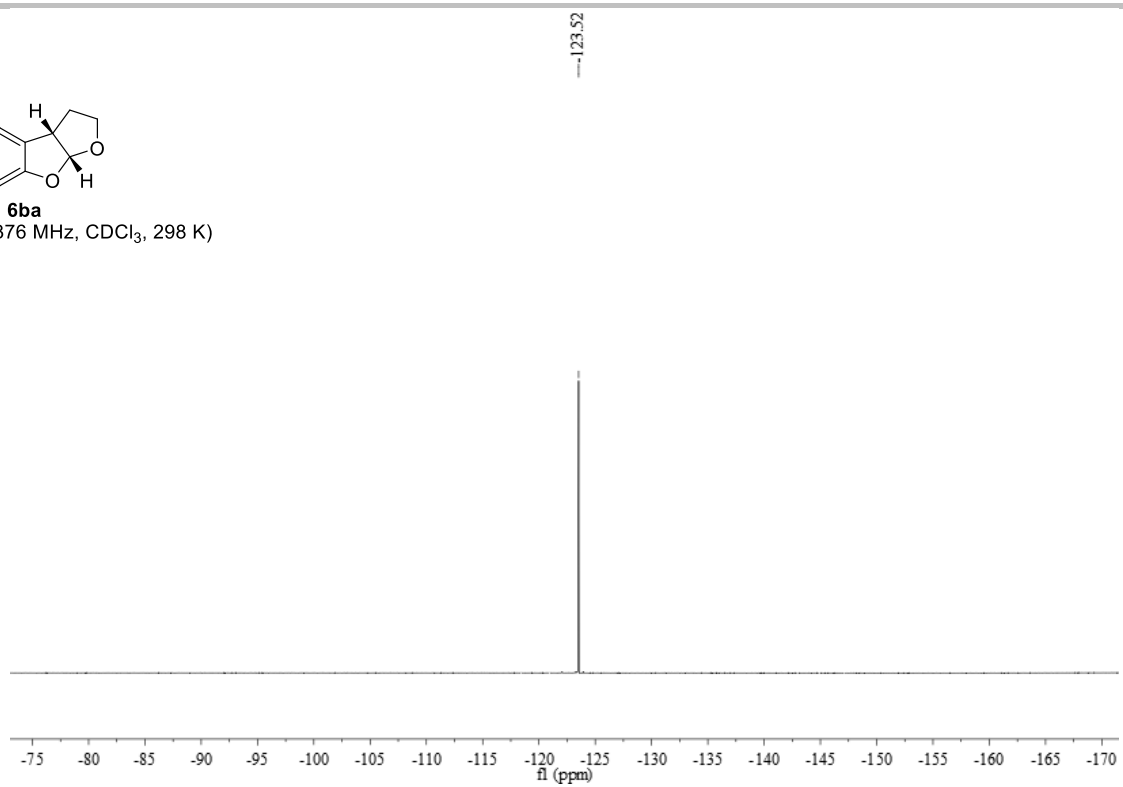

# Supporting Information

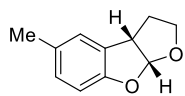

**6ca**

$^1\text{H}$  NMR (500 MHz,  $\text{CDCl}_3$ , 298 K)

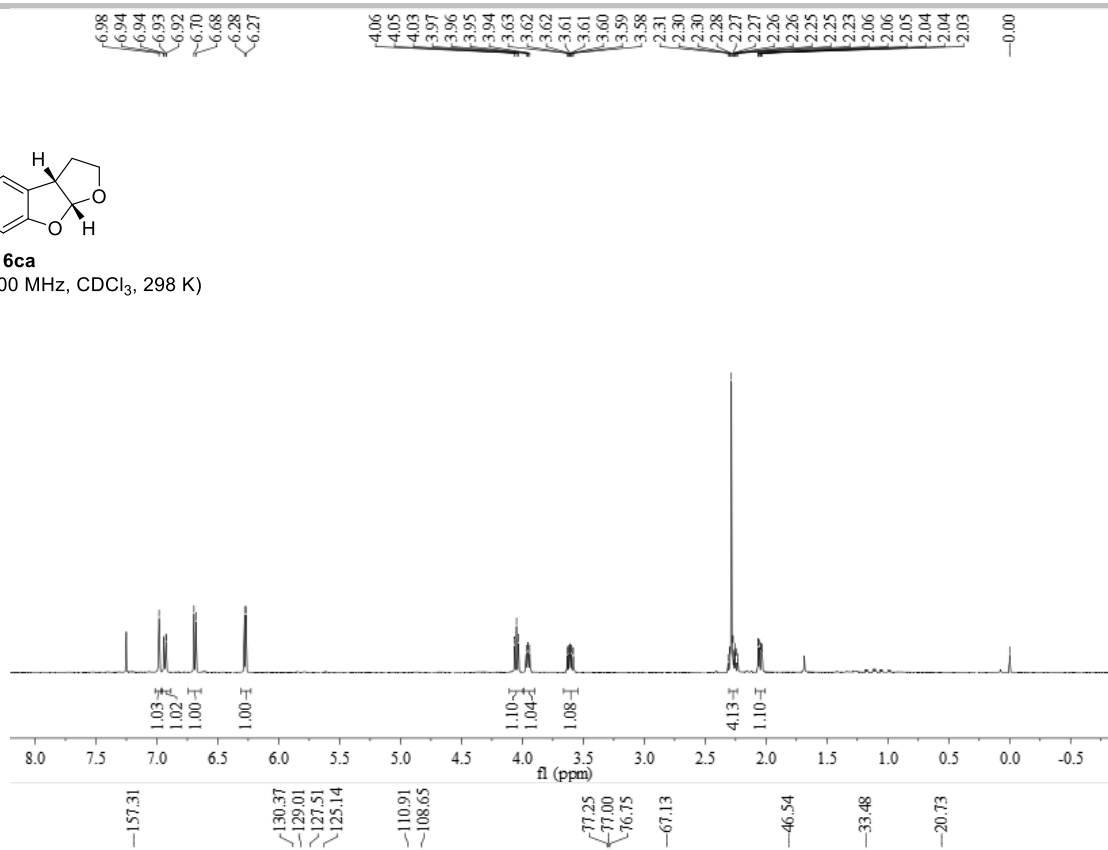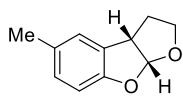

**6ca**

$^{13}\text{C}$  NMR (126 MHz,  $\text{CDCl}_3$ , 298 K)

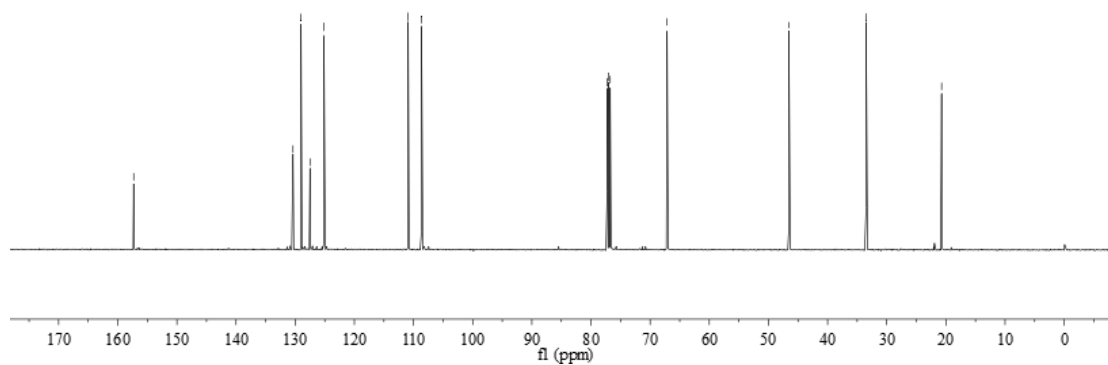



# Supporting Information

6.78, 6.77, 6.73, 6.72, 6.71, 6.69, 6.30, 6.29, 4.09, 4.07, 4.06, 4.01, 3.99, 3.98, 3.77, 3.66, 3.65, 3.64, 3.63, 3.63, 3.62, 3.61, 2.34, 2.32, 2.32, 2.31, 2.30, 2.29, 2.29, 2.28, 2.27, 2.27, 2.25, 2.10, 2.09, 2.07, 2.06

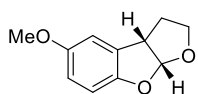

**6da**

<sup>1</sup>H NMR (500 MHz, CDCl<sub>3</sub>, 298 K)

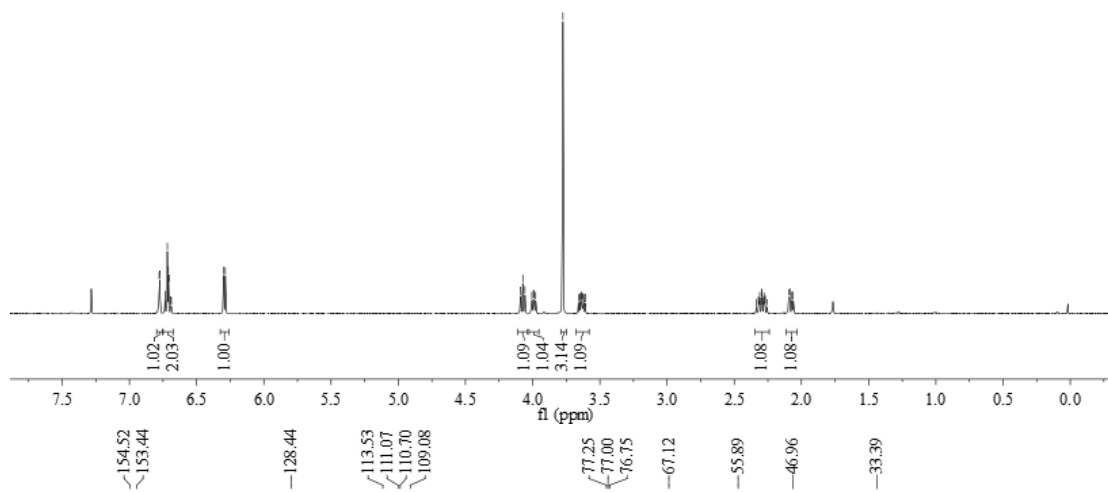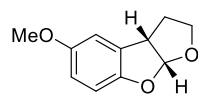

**6da**

<sup>13</sup>C NMR (126 MHz, CDCl<sub>3</sub>, 298 K)

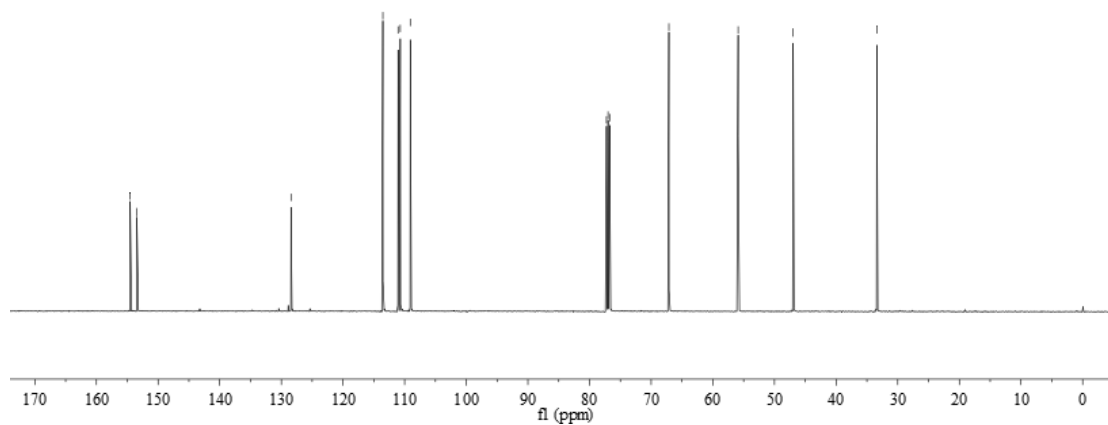

# Supporting Information

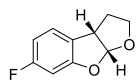

**6ea**

$^1\text{H}$  NMR (500 MHz,  $\text{CDCl}_3$ , 298 K)

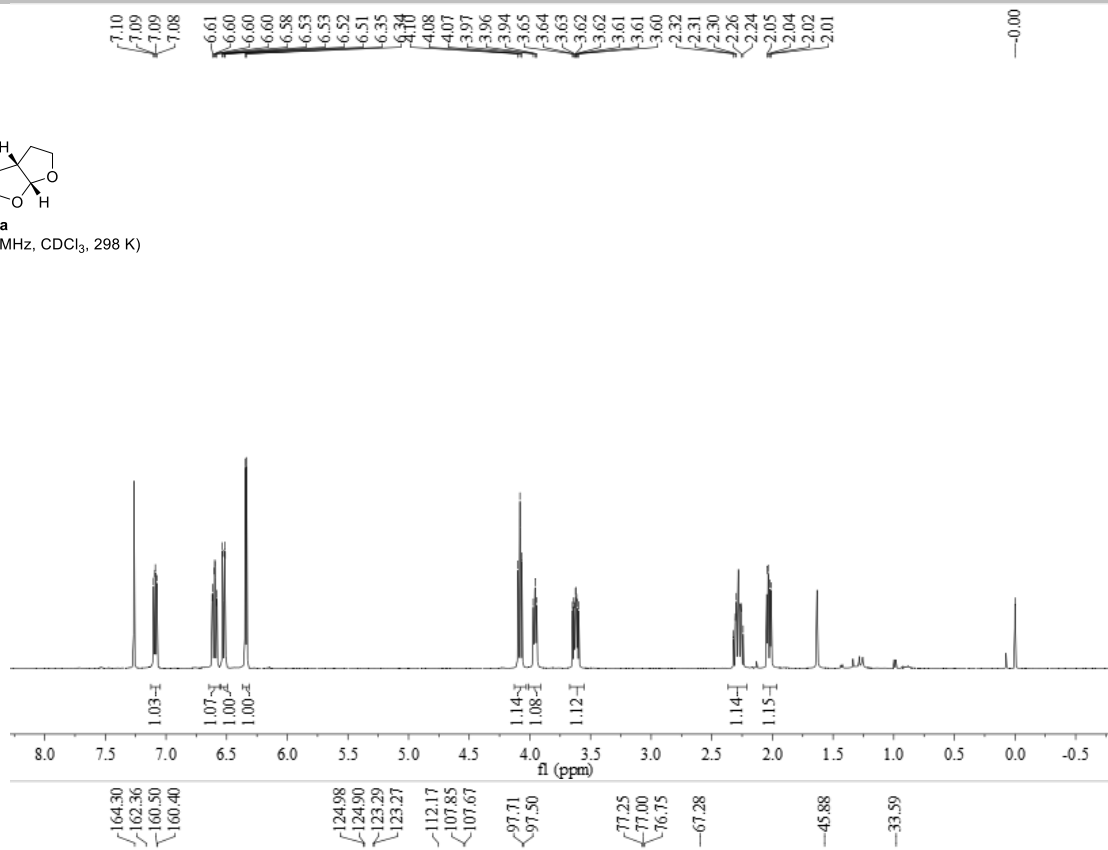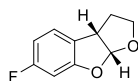

**6ea**

$^{13}\text{C}$  NMR (126 MHz,  $\text{CDCl}_3$ , 298 K)

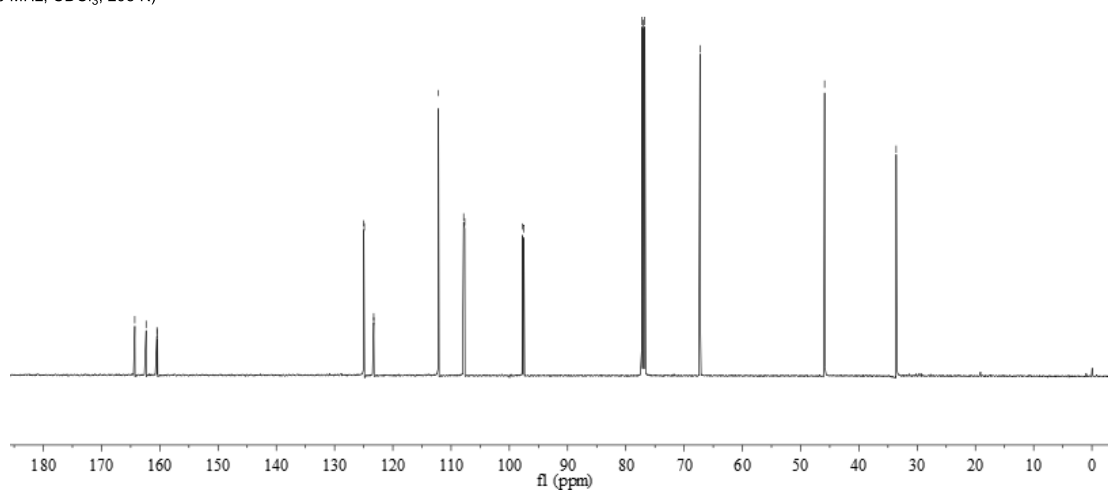

# Supporting Information

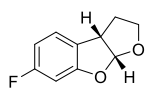

**6ea**

$^{19}\text{F}$  NMR (376 MHz,  $\text{CDCl}_3$ , 298 K)

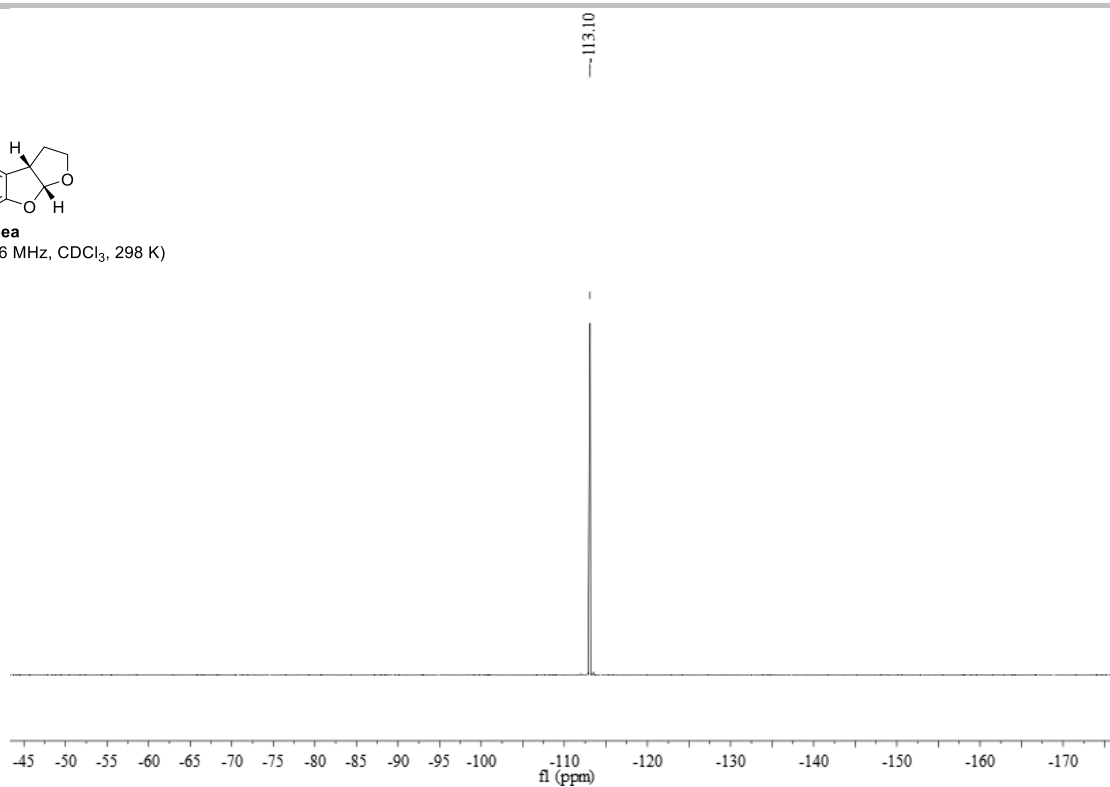

# Supporting Information

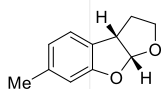

**6fa**

$^1\text{H NMR}$  (500 MHz,  $\text{CDCl}_3$ , 298 K)

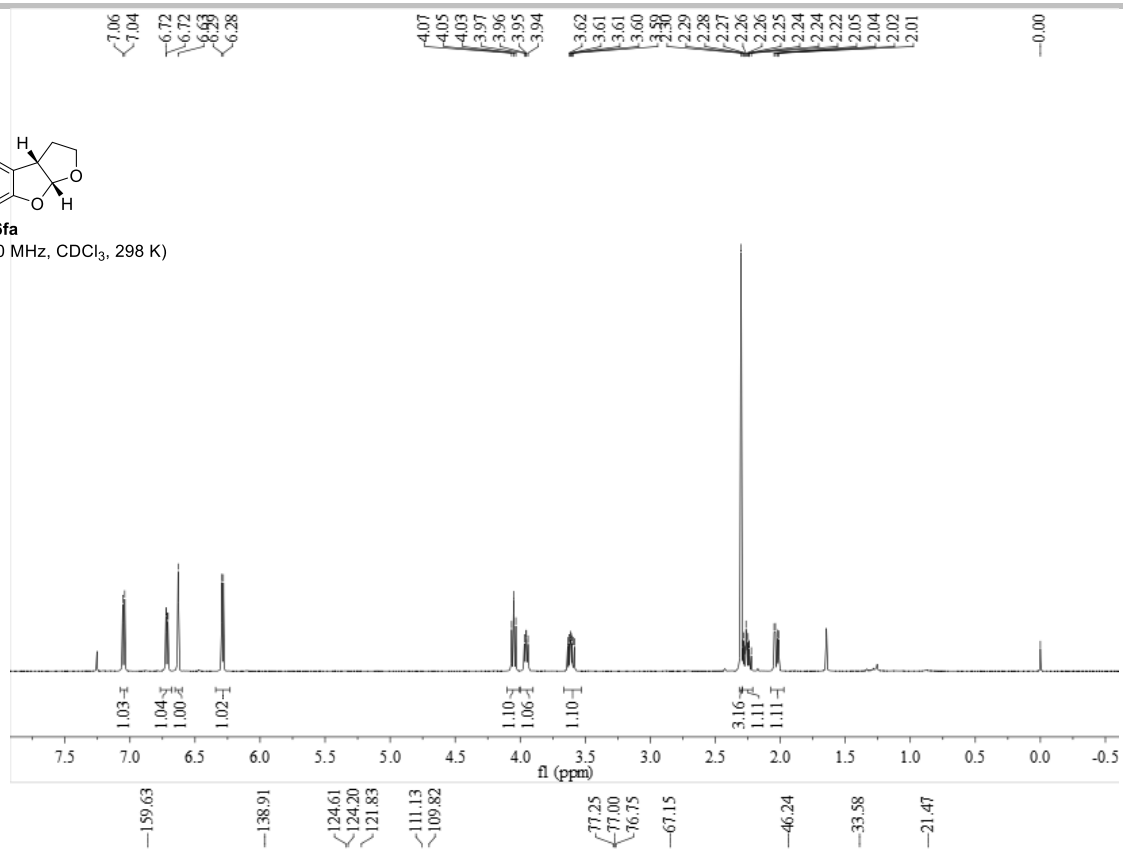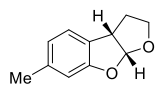

**6fa**

$^{13}\text{C NMR}$  (126 MHz,  $\text{CDCl}_3$ , 298 K)

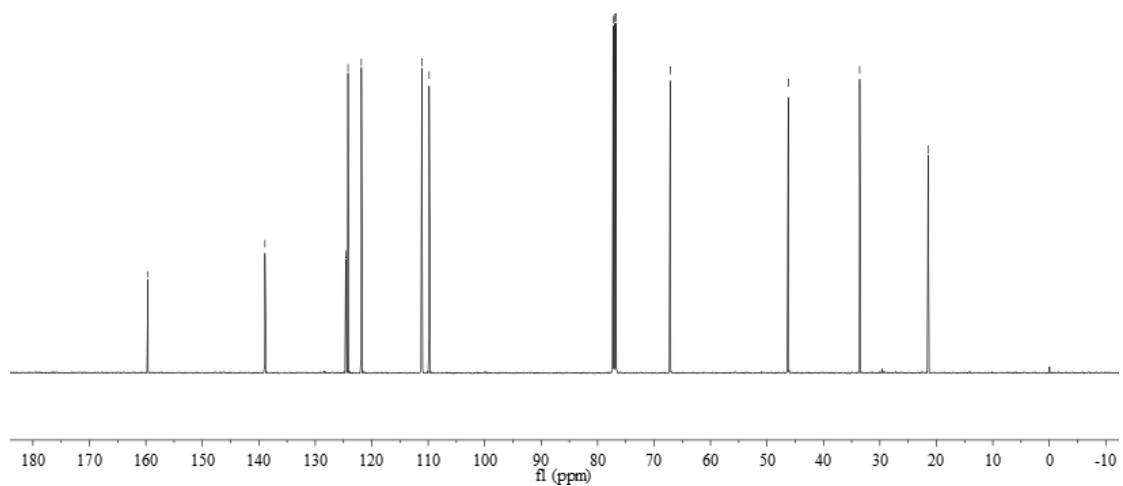

# Supporting Information

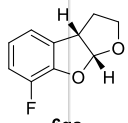

**6ga**

<sup>1</sup>H NMR (500 MHz, CDCl<sub>3</sub>, 298 K)

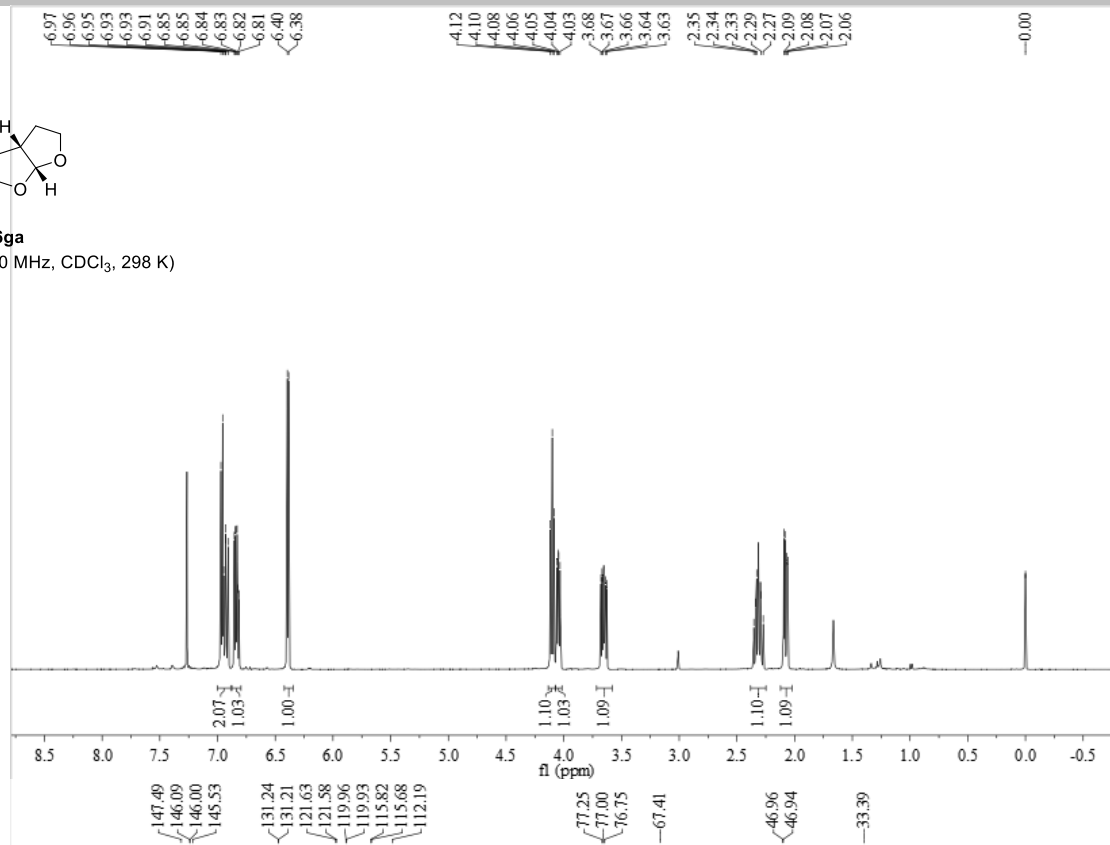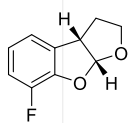

**6ga**

<sup>13</sup>C NMR (126 MHz, CDCl<sub>3</sub>, 298 K)

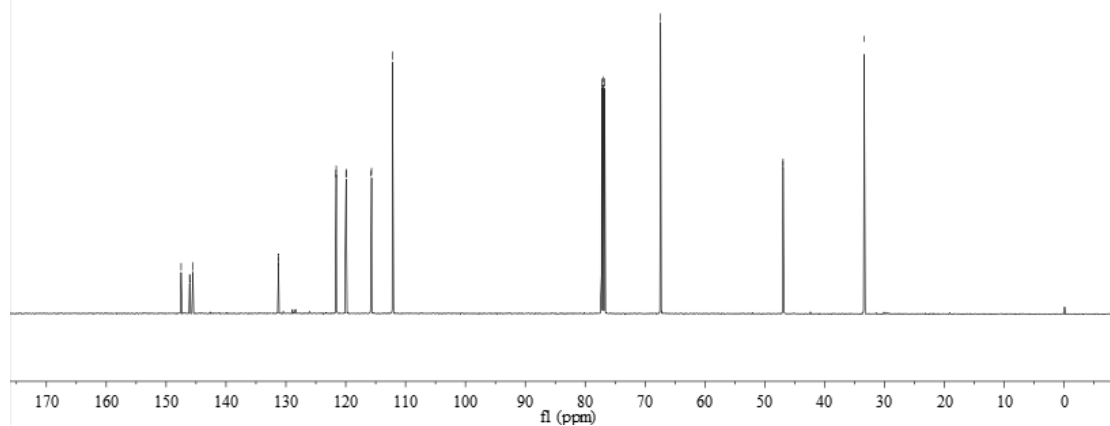

# Supporting Information

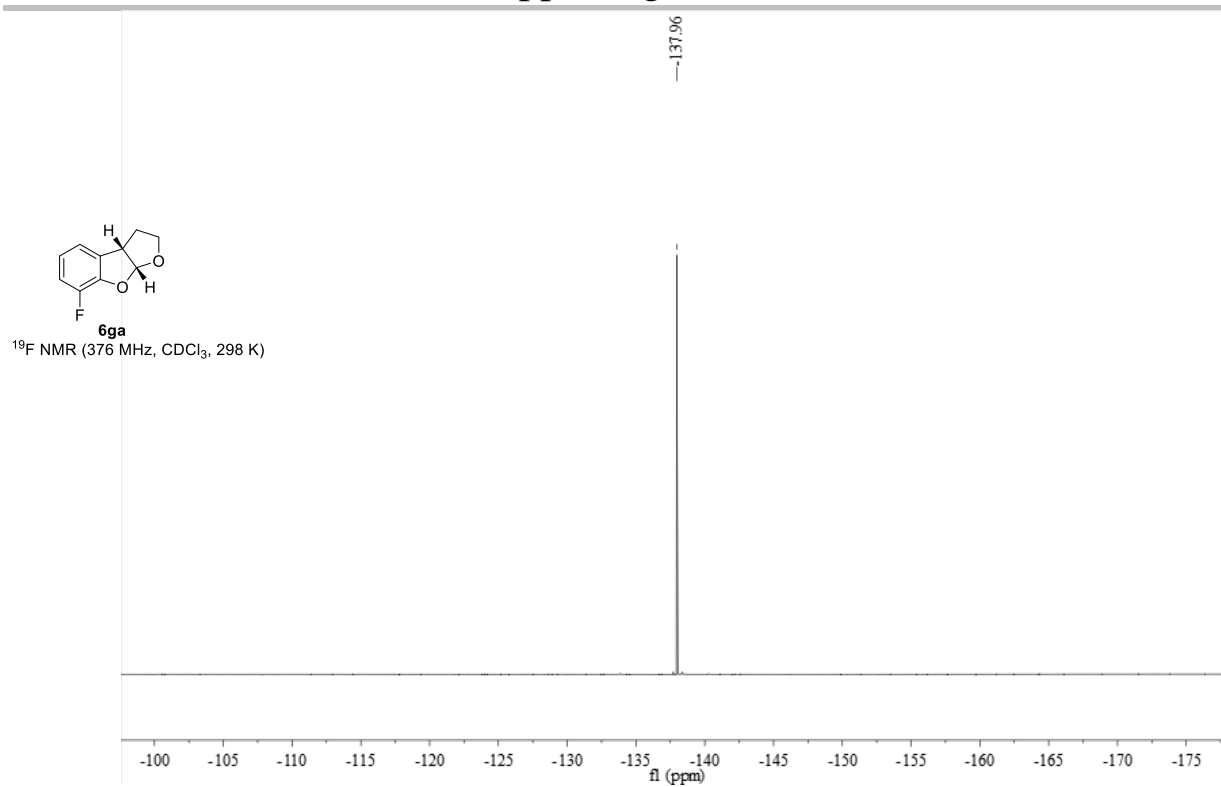

# Supporting Information

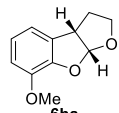

<sup>1</sup>H NMR (500 MHz, CDCl<sub>3</sub>, 298 K)

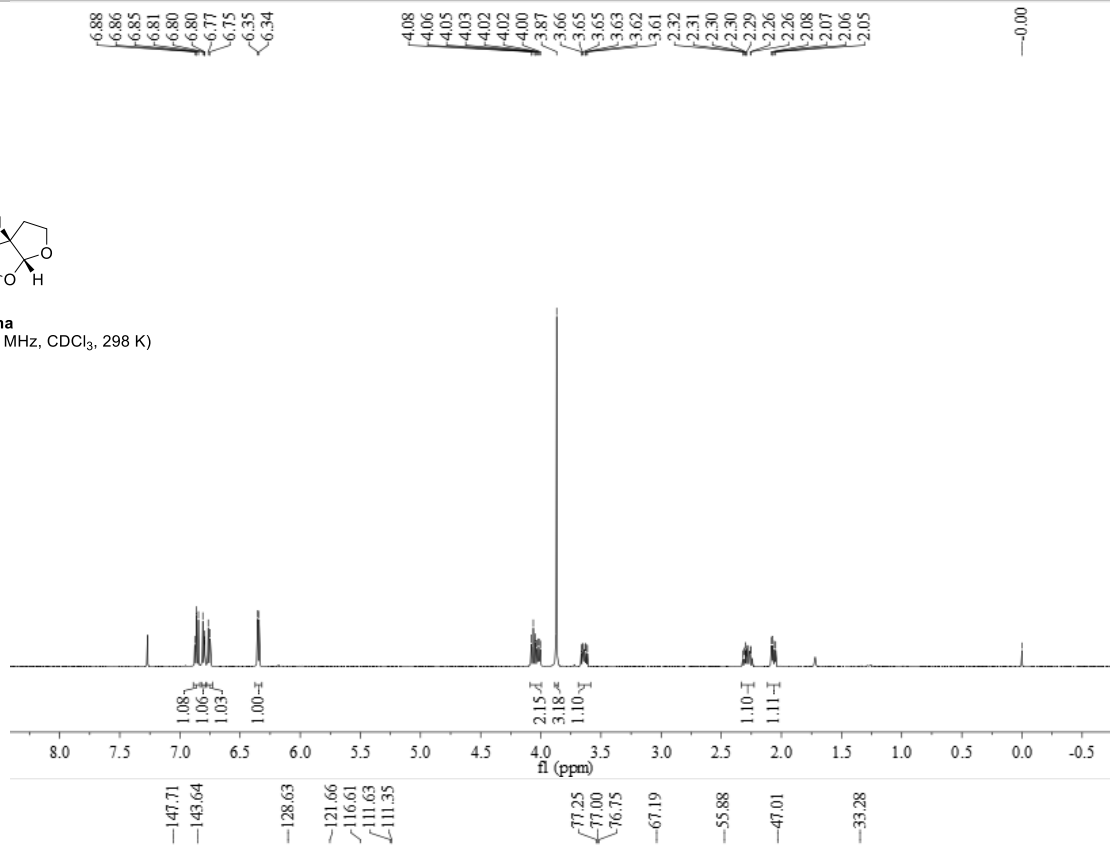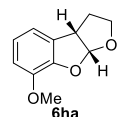

<sup>13</sup>C NMR (126 MHz, CDCl<sub>3</sub>, 298 K)

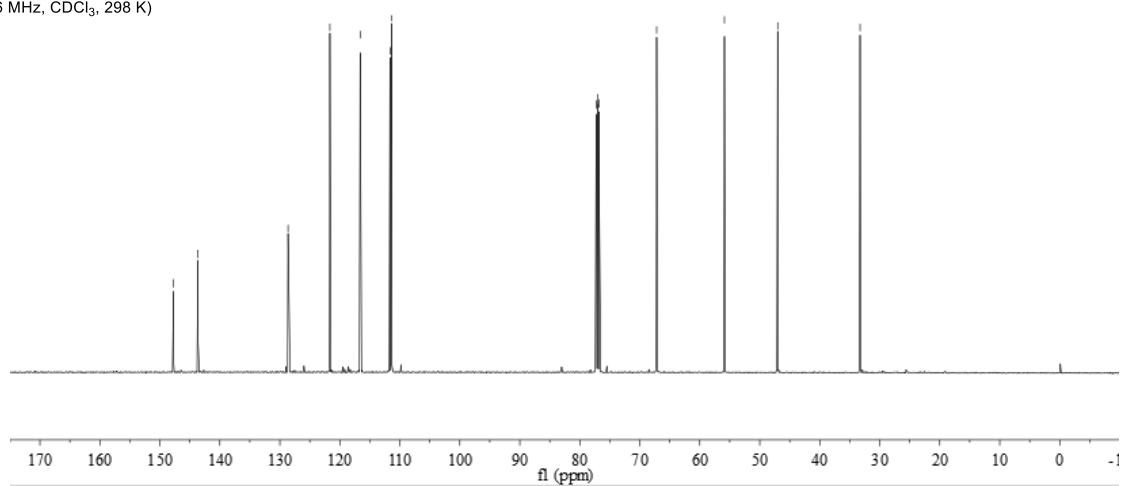

# Supporting Information

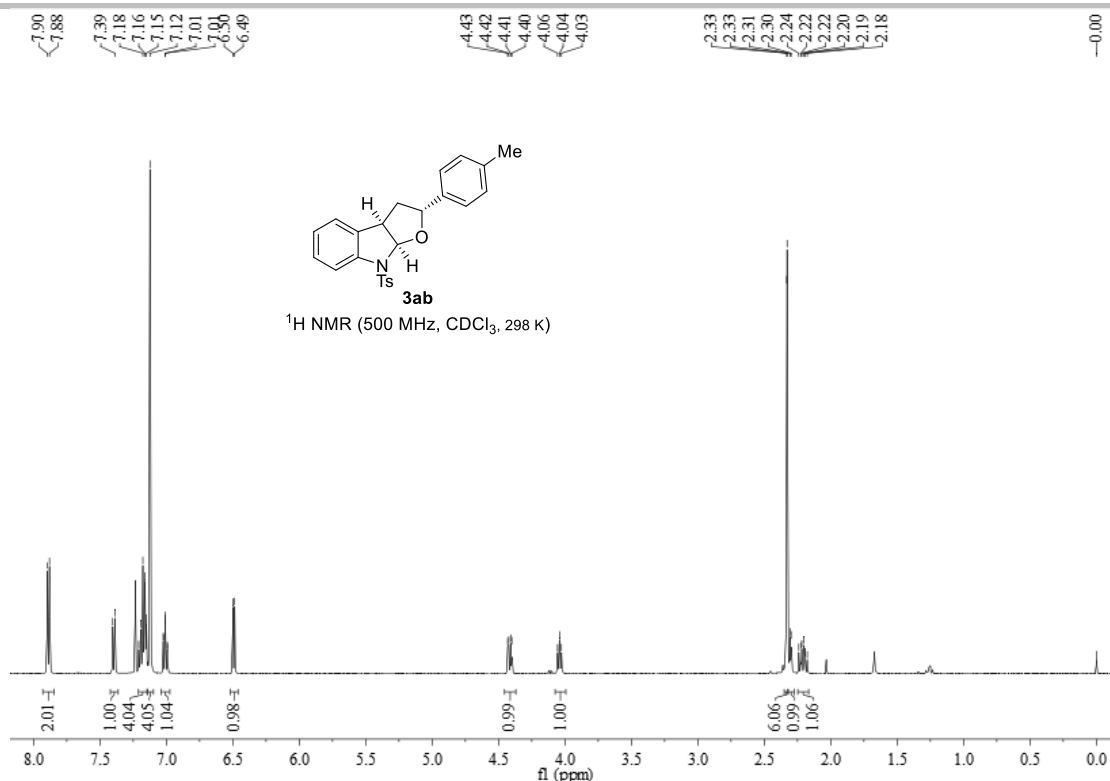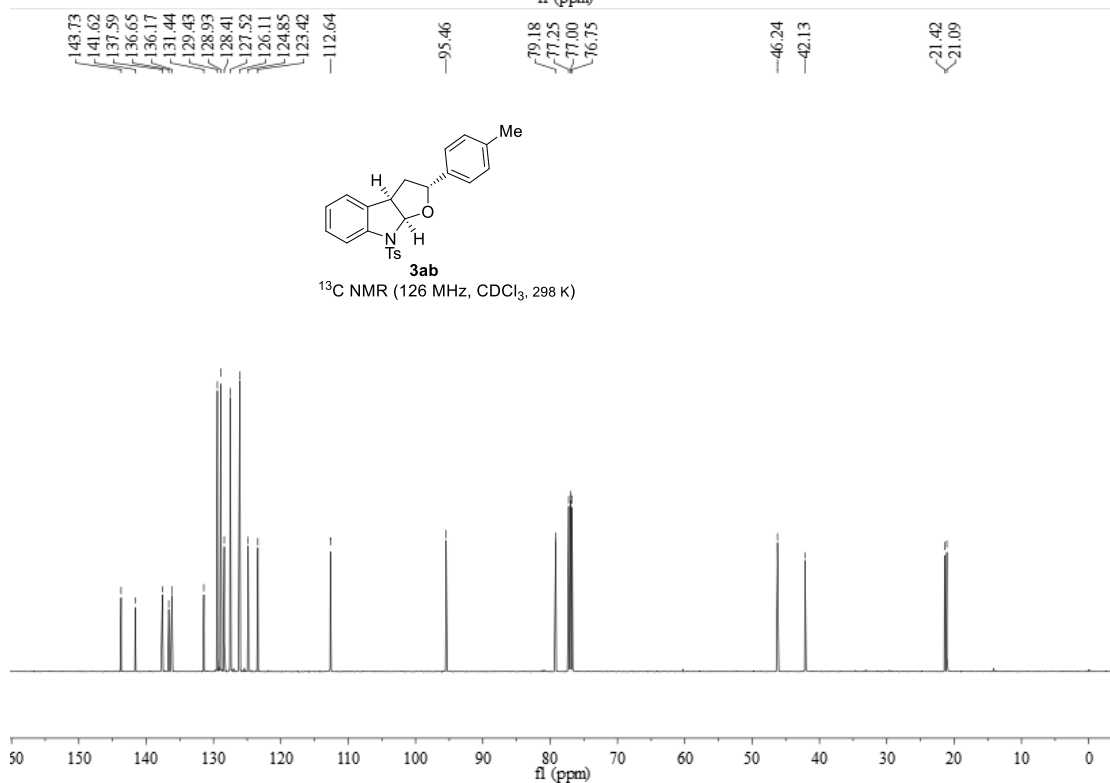



# Supporting Information

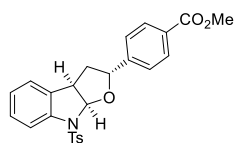

<sup>1</sup>H NMR (500 MHz, CDCl<sub>3</sub>, 298 K)

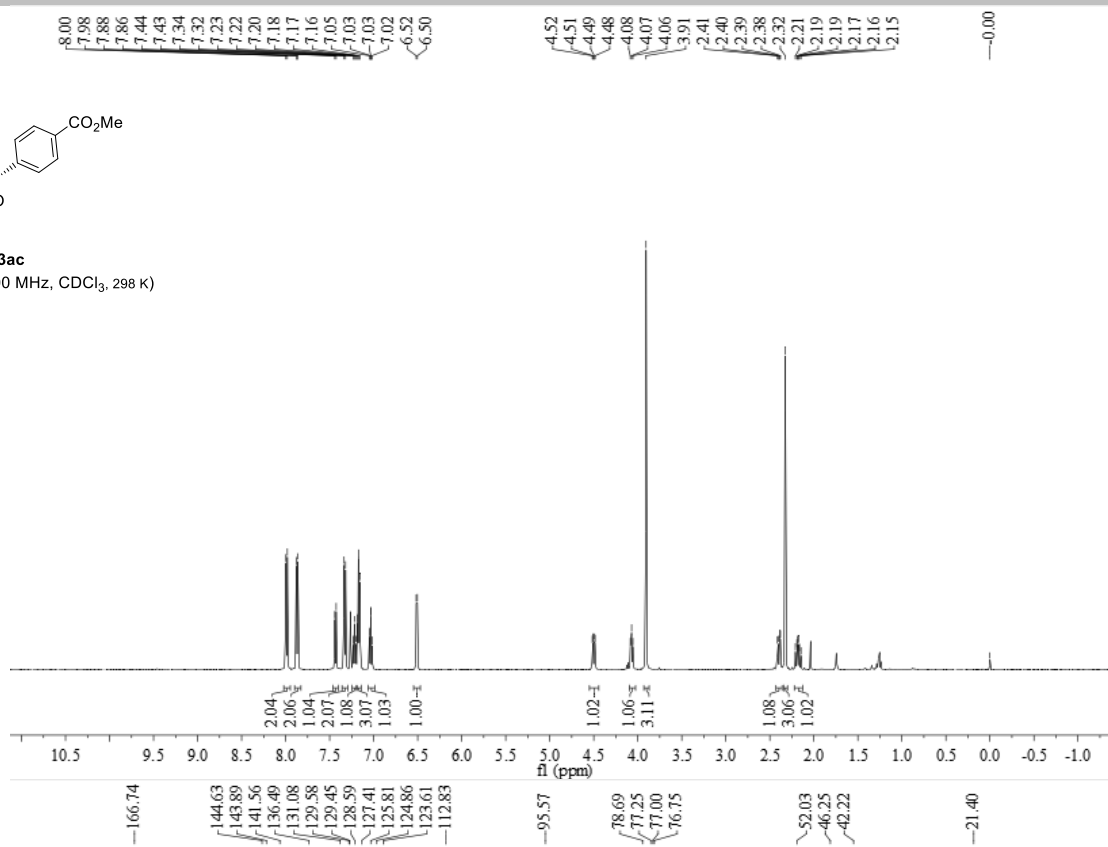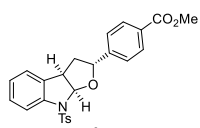

<sup>13</sup>C NMR (126 MHz, CDCl<sub>3</sub>, 298 K)

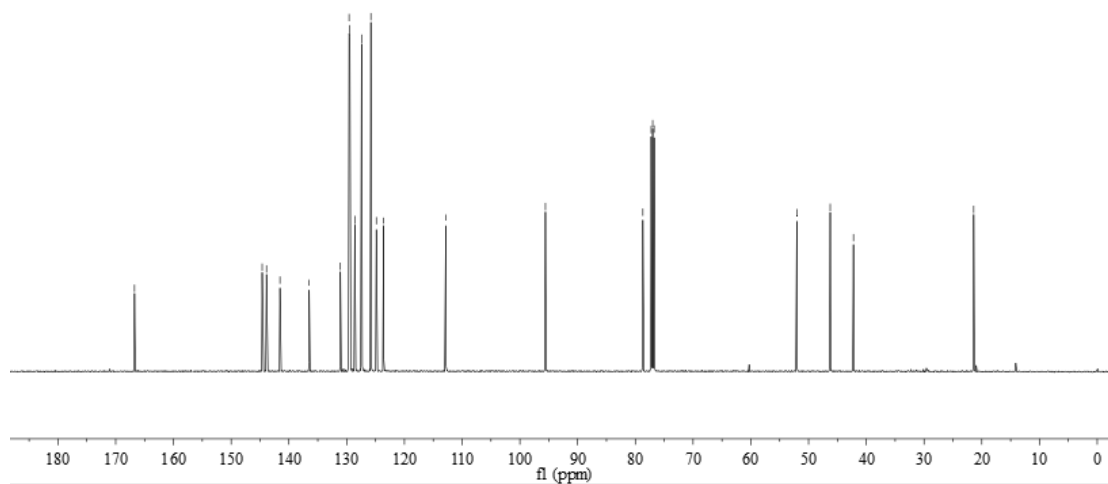

# Supporting Information

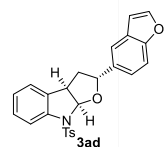

<sup>1</sup>H NMR (500 MHz, CDCl<sub>3</sub>, 298 K)

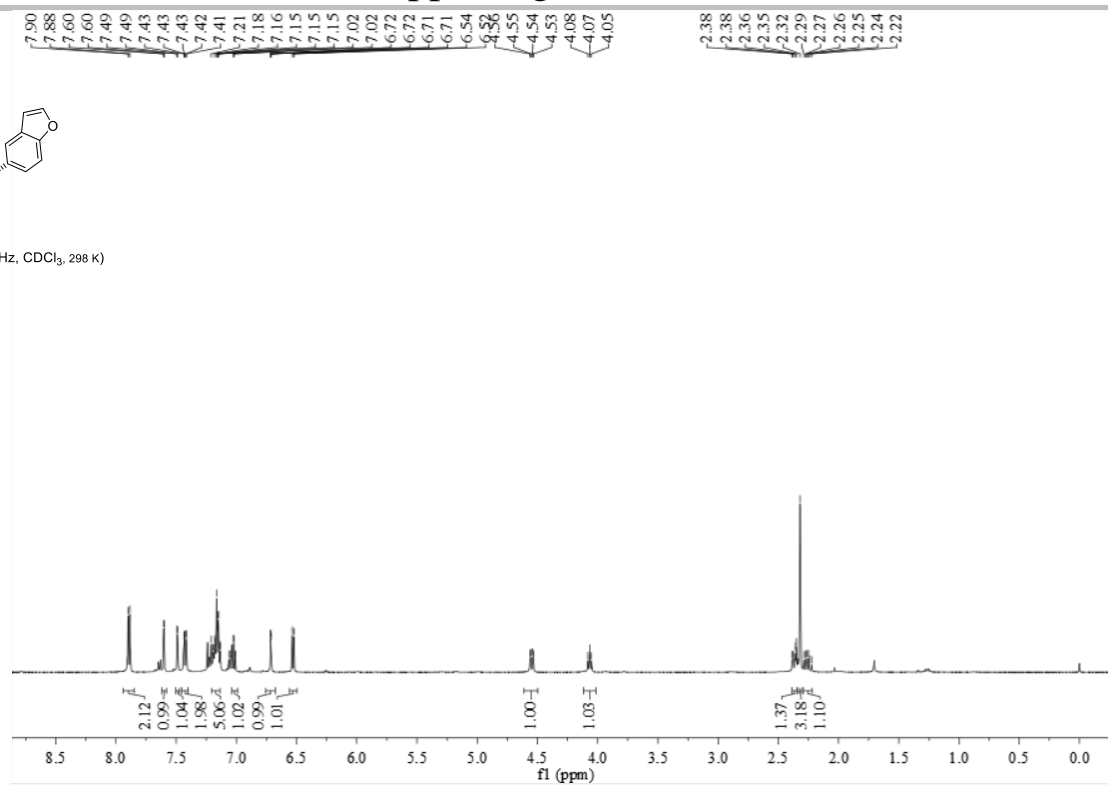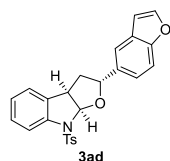

<sup>13</sup>C NMR (126 MHz, CDCl<sub>3</sub>, 298 K)

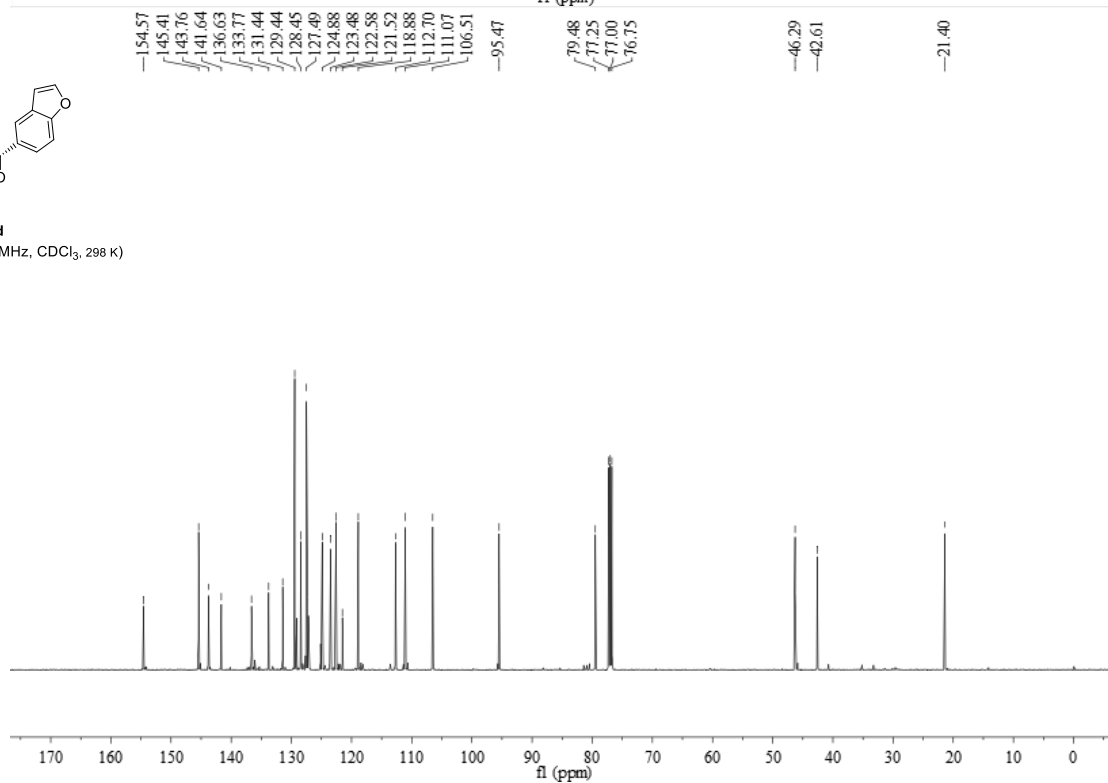

# Supporting Information

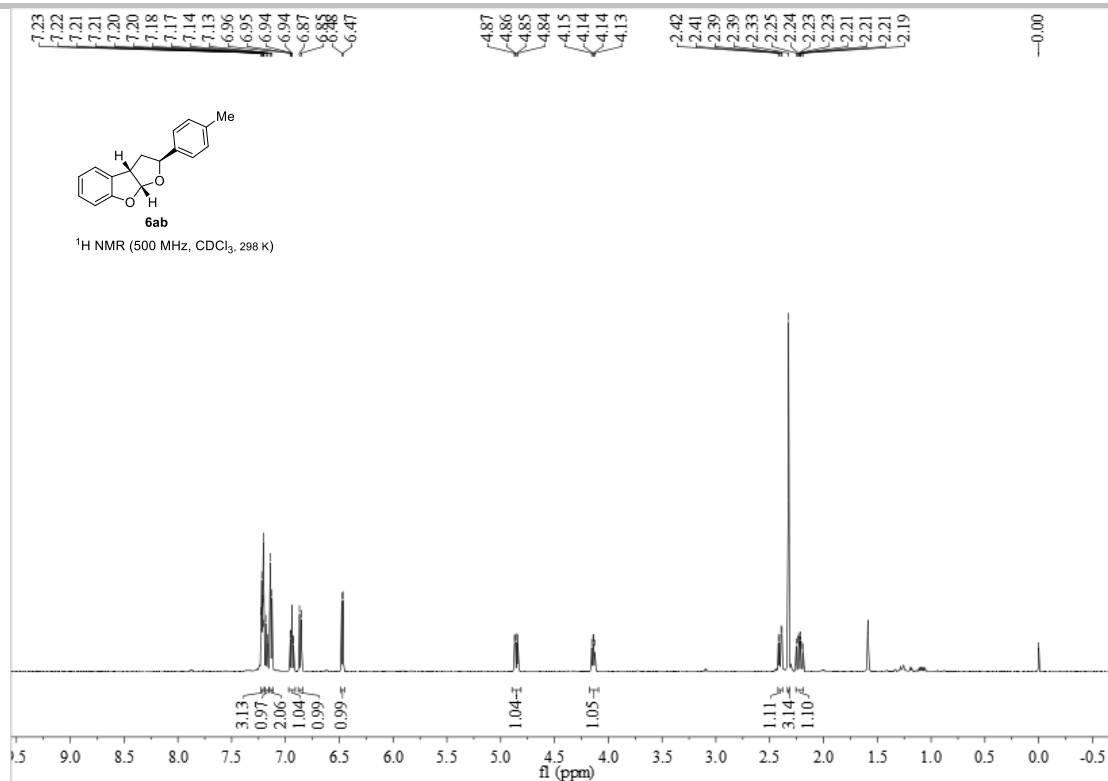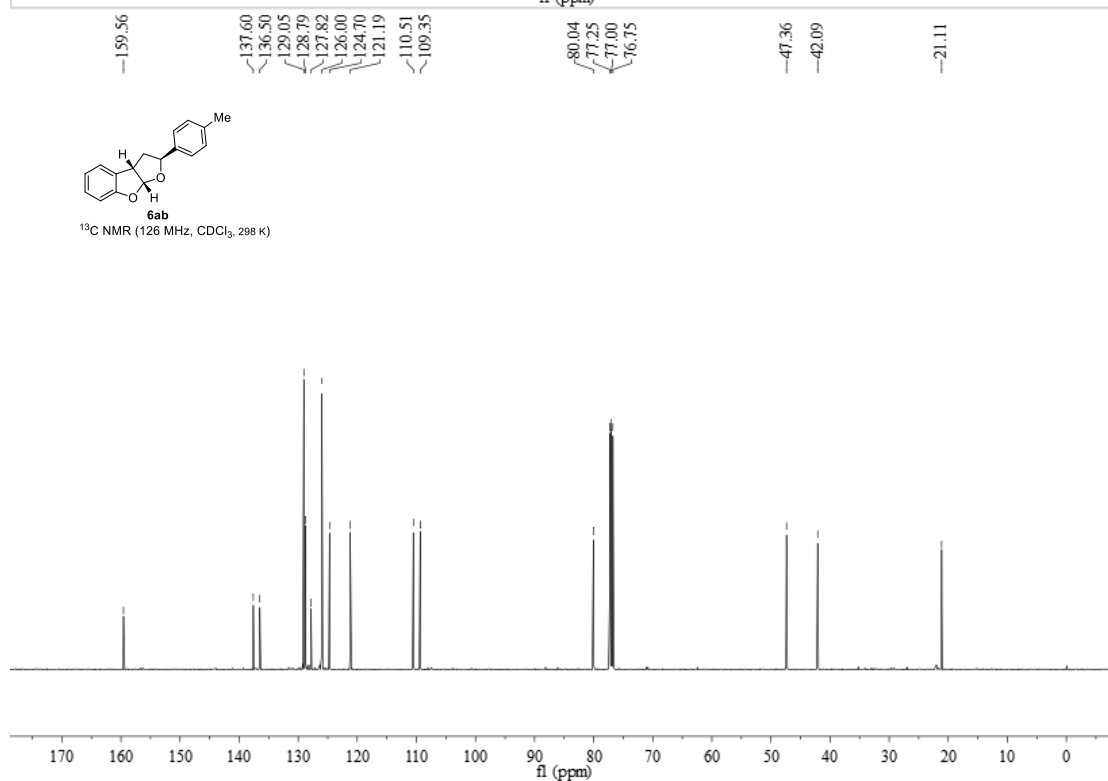

# Supporting Information

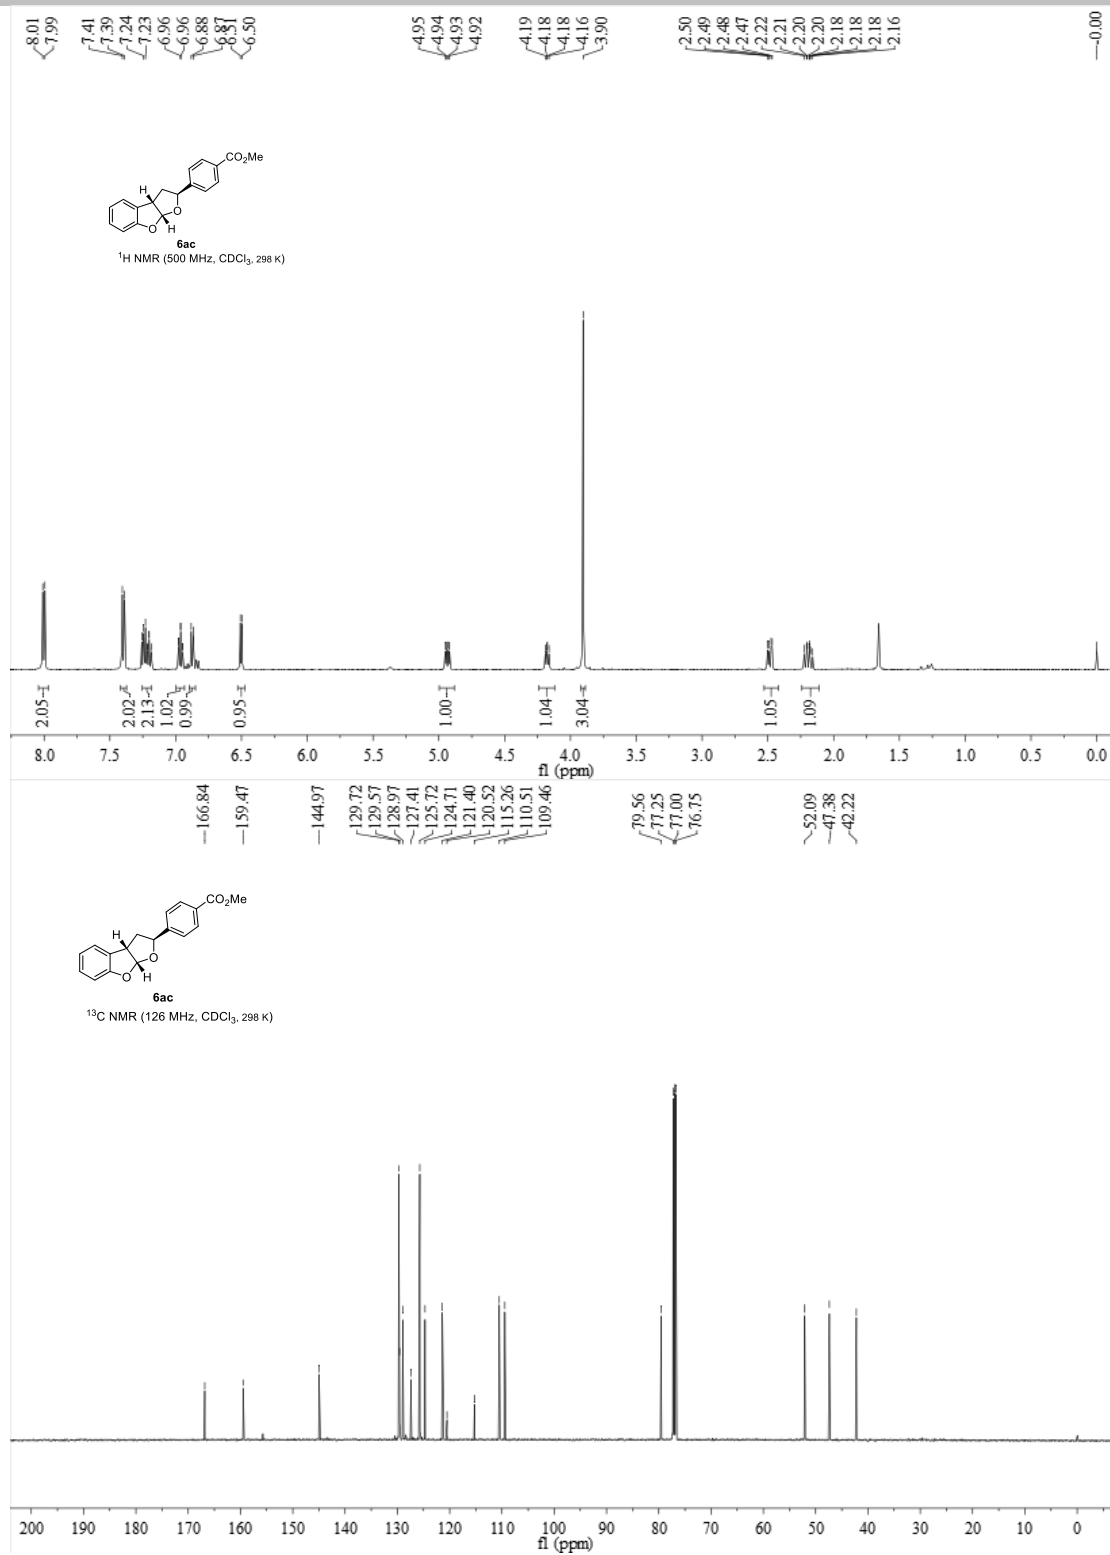

# Supporting Information

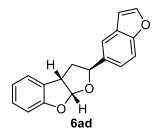

<sup>1</sup>H NMR (500 MHz, CDCl<sub>3</sub>, 298 K)

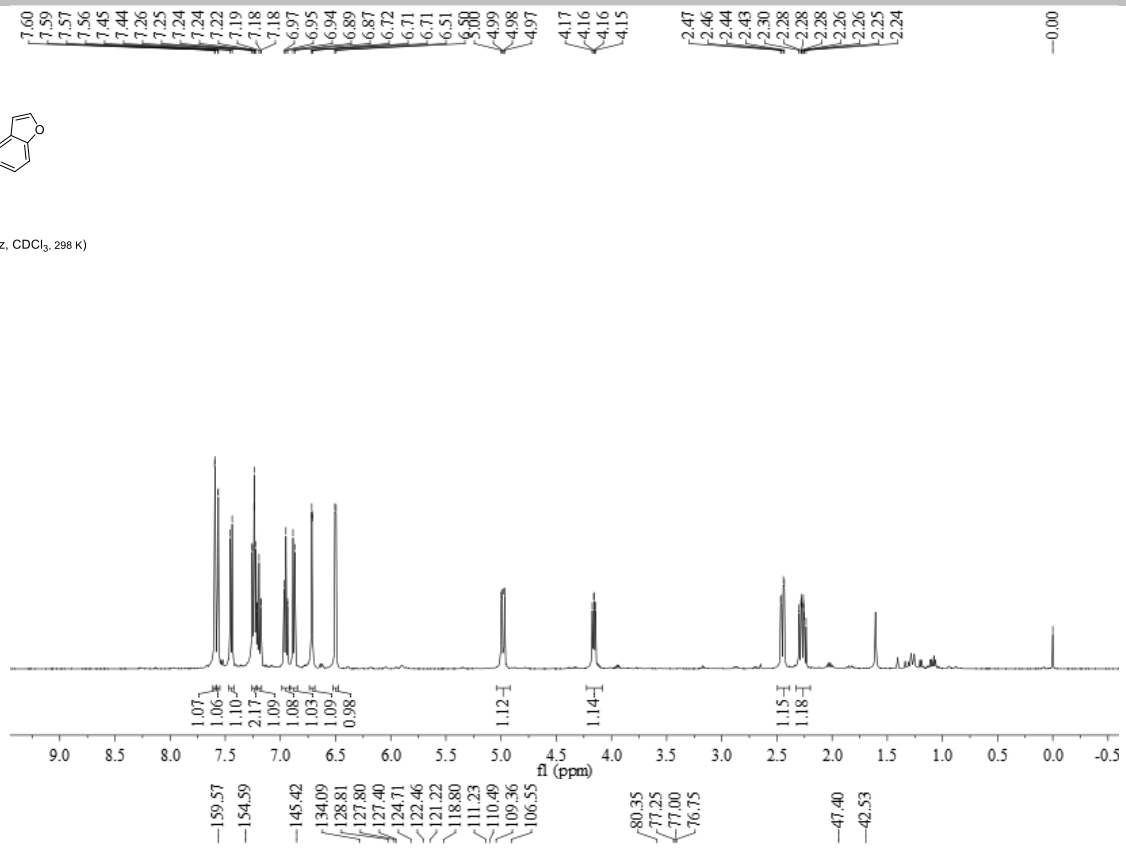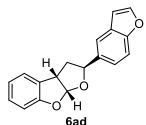

<sup>13</sup>C NMR (126 MHz, CDCl<sub>3</sub>, 298 K)

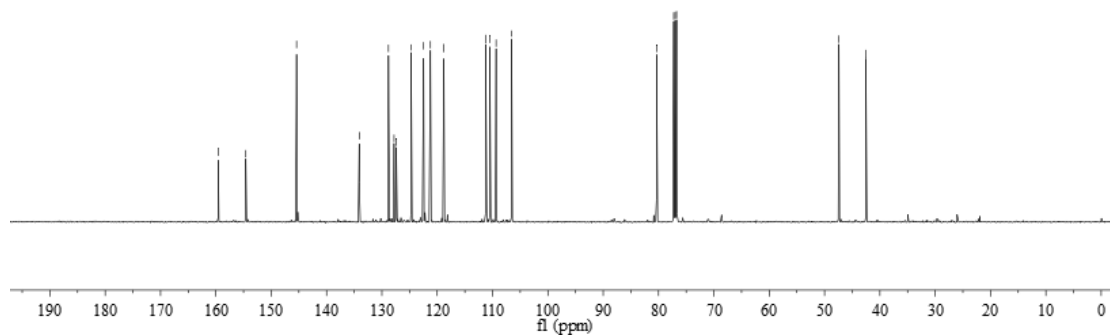

# Supporting Information

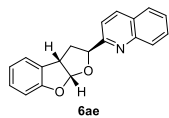

<sup>1</sup>H NMR (500 MHz, CDCl<sub>3</sub>, 298 K)

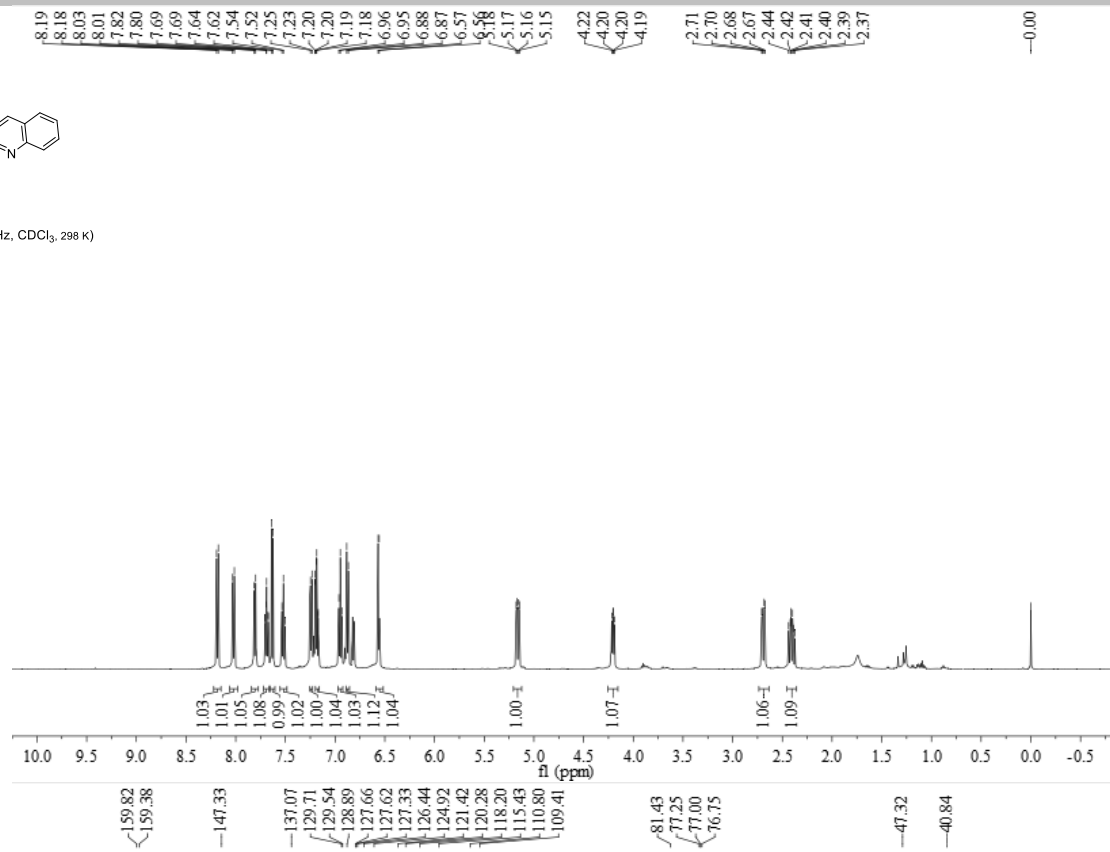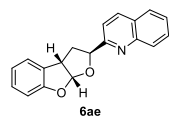

<sup>13</sup>C NMR (126 MHz, CDCl<sub>3</sub>, 298 K)

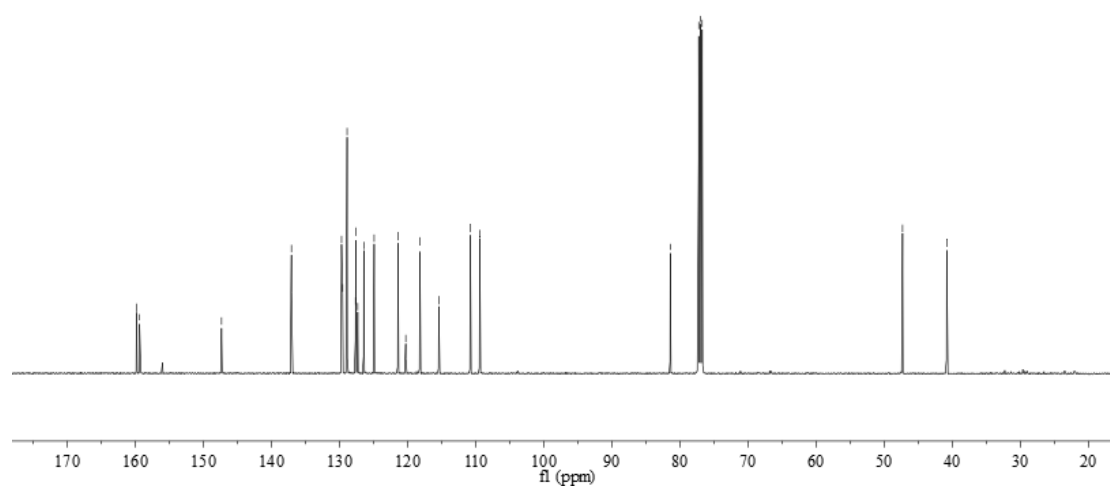

Supplement: SC-011-D0SC01391A-s001.pdf [file SC-011-D0SC01391A-s001.pdf]
